# Supplementary material for: Water-Soluble Fish Protein Intake Led to Lower Serum and Liver Cholesterol Concentrations in Obese Zucker fa/fa Rats
Source: Mar Drugs. 2018 May 1;16(5):149. doi: 10.3390/md16050149 (PMC5983280; doi:10.3390/md16050149)
Supplement: Supplementary file 1 [file marinedrugs-16-00149-s001.xlsx]

## Sheet: Raw data
Confidence	Annotated Sequence	Master Protein Accessions	Protein Accessions	m/z [Da]	MH+ [Da]	DeltaM [ppm]	Deltam/z [Da]	Ion Inject Time [ms]	RT [min]
High	ALQESHQQTLDDLQAEEDKVNTLTK	T2HFG0; H2UN88; C0STL2; P87344; Q98TQ5	H3CNF0; T2HFG0; Q4ST82; H2UN88; O93498; C0STL2; Q4SSC8; A0A0F8CAS0; P87344; H3CNI2; Q98TQ6; Q98TQ5; H9LBJ5	714.357	2854.41	0.138851	9.90844e-05	63.9212	61.6241
High	VPTPNVSVVDLTVR	Q8AWX8	A0A0R4IGI1; A0A0S7GK17; A0A0U2ERZ3; J9TGM4; L7NL90; C6FGX0; A0A0M4UPB6; A0A060WQ18; C6FGU8; Q5I1Z5; C7SPG8; A0A146RLE8; A0A0P7VZ44; E7DP96; E3TEB6; B5X5Z9; Q8JIQ0; K4P8V9; G3Q4G2; A0A0S7I4M5; I3JIY6; F5BZT5; Q90ZF1; B5DGR2; B8PXF5; A0A096M2G8; G9FPD2; D7RF67; Q2A665; B7U6G4; I6YYG2; M4AAH8; Q8AWX8; A0A146VUG8; I3K556; U3M7S9; H9B644; Q4SND7; S4SRW0; W5KQB8; A0A087XT39; Q3S910; B5SXM1; B5XG76; A0A…	748.427	1495.85	-1.00785	-0.000753792	93.2451	65.4111
High	VPTPNVSVVDLTVR	Q8AWX8	A0A0R4IGI1; A0A0S7GK17; A0A0U2ERZ3; J9TGM4; L7NL90; C6FGX0; A0A0M4UPB6; A0A060WQ18; C6FGU8; Q5I1Z5; C7SPG8; A0A146RLE8; A0A0P7VZ44; E7DP96; E3TEB6; B5X5Z9; Q8JIQ0; K4P8V9; G3Q4G2; A0A0S7I4M5; I3JIY6; F5BZT5; Q90ZF1; B5DGR2; B8PXF5; A0A096M2G8; G9FPD2; D7RF67; Q2A665; B7U6G4; I6YYG2; M4AAH8; Q8AWX8; A0A146VUG8; I3K556; U3M7S9; H9B644; Q4SND7; S4SRW0; W5KQB8; A0A087XT39; Q3S910; B5SXM1; B5XG76; A0A…	748.427	1495.85	-0.436604	-0.000326546	100	65.4654
High	NSYEETLDQLETMK	A0A060VYS1	A0A060VYS1	850.886	1700.77	-1.57842	-0.00134227	100	65.6581
High	NSYEETLDQLETMK	A0A060VYS1	A0A060VYS1	850.885	1700.76	-2.7268	-0.00231883	100	65.6981
High	NSYEETLDQLETMK	A0A060VYS1	A0A060VYS1	850.889	1700.77	1.65139	0.00140432	95.8242	65.7383
High	NSYEETLDQLETMK	A0A060VYS1	A0A060VYS1	850.889	1700.77	1.22075	0.00103811	79.6161	65.7896
High	LFLQVFSAGAR	P56503	P86758; P86744; P86775; P86771; P86753; P86762; P56503; P86757; P86769	604.843	1208.68	-0.187299	-0.000113192	66.8233	65.8897
High	LFLQVFSAGAR	P56503	P86758; P86744; P86775; P86771; P86753; P86762; P56503; P86757; P86769	604.843	1208.68	-0.591279	-0.000357333	42.8655	65.9922
High	RSASILDDVLRFEK	A0A060XUK2	A0A060XZH2; A0A060XUK2	550.305	1648.9	-1.43667	-0.000789642	85.5912	66.4601
High	RSASILDDVLRFEK	A0A060XUK2	A0A060XZH2; A0A060XUK2	550.305	1648.9	-1.21457	-0.000667572	100	66.4985
High	RSASILDDVLRFEK	A0A060XUK2	A0A060XZH2; A0A060XUK2	550.305	1648.9	-1.43667	-0.000789642	45.8576	66.5436
High	RSASILDDVLRFEK	A0A060XUK2	A0A060XZH2; A0A060XUK2	550.304	1648.9	-2.10295	-0.00115585	73.7691	66.5921
High	AVTISDVITSMASK	P98093	P98093	711.879	1422.75	0.375064	0.000266811	64.3181	67.0474
High	AVTISDVITSMASK	P98093	P98093	711.878	1422.75	-0.826119	-0.000587681	45.2623	67.1387
High	AVTISDVITSMASK	P98093	P98093	711.88	1422.75	0.63246	0.000449917	60.6976	67.176
High	VPTPNVSVVDLTVR	Q8AWX8	A0A0R4IGI1; A0A0S7GK17; A0A0U2ERZ3; J9TGM4; L7NL90; C6FGX0; A0A0M4UPB6; A0A060WQ18; C6FGU8; Q5I1Z5; C7SPG8; A0A146RLE8; A0A0P7VZ44; E7DP96; E3TEB6; B5X5Z9; Q8JIQ0; K4P8V9; G3Q4G2; A0A0S7I4M5; I3JIY6; F5BZT5; Q90ZF1; B5DGR2; B8PXF5; A0A096M2G8; G9FPD2; D7RF67; Q2A665; B7U6G4; I6YYG2; M4AAH8; Q8AWX8; A0A146VUG8; I3K556; U3M7S9; H9B644; Q4SND7; S4SRW0; W5KQB8; A0A087XT39; Q3S910; B5SXM1; B5XG76; A0A…	748.427	1495.85	-0.599816	-0.000448617	100	65.3624
High	MLGQNPTREELDEIIEEVDEDGSGTIDFEEFLVMMVR	A0A060WZV7	F5BZS8; B9EP57; H2SBN2; B9VJM4; H2L8Q7; A0A146V9Q1; A0A146P9L9; I3IZI3; H2L8Q9; A0A060WZV7; Q4RB38; A0A060YT85; H2L8R0; A0A146ZN37; G3NJM6	1429.34	4285.99	1.90509	0.00272172	100	164.856
High	LQGEVEDLMVDVER	B1Q382; P87344; B1Q385	B1Q382; A0A146UUF4; A0A146QJC9; A0A146UUW2; A0A146UUB4; B1Q383; P87344; A0A146ZJ51; B1Q385; B1Q384; A0A146UTU4	816.4	1631.79	-1.14121	-0.000931111	37.6011	65.3465
High	NGLMVAEIEELR	B1Q382; A0A087XQZ5; T2HFG0; Q8JIP5; P87344; B1Q385; Q98TQ5; Q33BP2	B1Q382; C4TIP2; C4TIP3; M3ZPQ1; A0A060YBV0; A0A060YS70; A0A0S7JAN2; Q91208; A0A060Y5W1; A0A087XQZ5; A0A060XRS6; T2HFG0; Q9IBD7; A0A0S7J8H5; A0A060YNF5; A0A060YKV8; A0A0S7J8I5; A0A060YK07; B1Q383; I3IZU1; Q8JIP5; A0A146ZZE3; A4PDX4; I3JYT9; P87344; Q9W642; A0A060YBI3; B1Q385; A0A060YKE6; B1Q384; A0A060YK95; Q98TQ5; A0A061AD12; B7SVK2; I3IZY4; A0A0S7J8G1; Q33BP2; I3IZY3; Q8JIV4; A0A060YUR3; A0A060X…	687.358	1373.71	-0.569733	-0.000391324	43.9984	65.2984
High	IGVDEFGAMIK	A5I874	E1UIZ8; A5I874	590.307	1179.61	-0.505411	-0.000298093	53.006	63.1813
High	LGSSEVDQVQMVVDGVK	B5DGP2	S0F2P2; Q98SS7; B5DGP1; A0A0A1IX88; C1BIK3; A0A060XA59; B5DGP2	895.449	1789.89	-4.89247	-0.00437851	100	63.5999
High	MLGQNPTREELDEIIEEVDEDGSGTIDFEEFLVMMVR	A0A060WZV7	F5BZS8; B9EP57; H2SBN2; B9VJM4; H2L8Q7; A0A146V9Q1; A0A146P9L9; I3IZI3; H2L8Q9; A0A060WZV7; Q4RB38; A0A060YT85; H2L8R0; A0A146ZN37; G3NJM6	1429.33	4285.98	-0.487343	-0.000696248	100	164.902
High	TIDDLEDELYAQK	D6PVP3; Q8AV86; Q8JIM7; Q5SPK6; H2SQV9; A0A087YEU9; A0A087YF71; P13104; A0A0F8CF82	K4PEK4; A0A060WJN0; D6PVP3; H2SQW0; A0A060WLJ6; H3DQ99; G1FCF2; Q6P0W3; Q8AV86; Q5SPK5; W5K5N7; Q8JIM7; H2M5M4; X2J4M2; I3J2Q1; A0A0P7TWT7; W5KS79; A0A147AVZ3; Q4RB49; A0A146NCI0; Q5SPK6; A0A060WRJ2; Q4SAI3; A0A0S7FXE9; Q91490; I3JVV2; W5JYT8; H2SQV9; A0A087YEU9; A0A087YF71; A0A146WFT2; A0A146YH85; A0A060W8G0; P13104; Q91472; Q805C6; Q76CT4; Q9DEB7; G3PVL1; B9V2W9; A0A060X9W2; A0A0F8CF82; F2WR17;…	776.873	1552.74	0.399204	0.000309929	58.7304	63.7962
High	AISEELDHALNDMTSM	Q5SPK6; A0A146W5Y8; H2SQV9; A0A0F8CF82	A0A0P7V399; A0A060X0I2; A0A060WJN0; H2SQW0; A0A060WLJ6; H3DQ99; Q5SPK5; G3N8Q3; A0A0P7TWT7; Q4RB49; Q5SPK6; A0A060WRJ2; A0A146W5Y8; H2SQV9; G3PVL1; A0A0F8CF82; G3PVK9	888.89	1776.77	-2.81476	-0.0025006	47.7428	64.3424
High	AISEELDHALNDMTSM	Q5SPK6; A0A146W5Y8; H2SQV9; A0A0F8CF82	A0A0P7V399; A0A060X0I2; A0A060WJN0; H2SQW0; A0A060WLJ6; H3DQ99; Q5SPK5; G3N8Q3; A0A0P7TWT7; Q4RB49; Q5SPK6; A0A060WRJ2; A0A146W5Y8; H2SQV9; G3PVL1; A0A0F8CF82; G3PVK9	888.891	1776.77	-2.05902	-0.00182921	43.1303	64.3924
High	AISEELDHALNDMTSM	Q5SPK6; A0A146W5Y8; H2SQV9; A0A0F8CF82	A0A0P7V399; A0A060X0I2; A0A060WJN0; H2SQW0; A0A060WLJ6; H3DQ99; Q5SPK5; G3N8Q3; A0A0P7TWT7; Q4RB49; Q5SPK6; A0A060WRJ2; A0A146W5Y8; H2SQV9; G3PVL1; A0A0F8CF82; G3PVK9	888.892	1776.78	-1.02848	-0.000913687	78.1015	64.4414
High	AISEELDHALNDMTSM	Q5SPK6; A0A146W5Y8; H2SQV9; A0A0F8CF82	A0A0P7V399; A0A060X0I2; A0A060WJN0; H2SQW0; A0A060WLJ6; H3DQ99; Q5SPK5; G3N8Q3; A0A0P7TWT7; Q4RB49; Q5SPK6; A0A060WRJ2; A0A146W5Y8; H2SQV9; G3PVL1; A0A0F8CF82; G3PVK9	888.891	1776.77	-1.71551	-0.00152404	57.1228	64.4911
High	NGLMVAEIEELR	B1Q382; A0A087XQZ5; T2HFG0; Q8JIP5; P87344; B1Q385; Q98TQ5; Q33BP2	B1Q382; C4TIP2; C4TIP3; M3ZPQ1; A0A060YBV0; A0A060YS70; A0A0S7JAN2; Q91208; A0A060Y5W1; A0A087XQZ5; A0A060XRS6; T2HFG0; Q9IBD7; A0A0S7J8H5; A0A060YNF5; A0A060YKV8; A0A0S7J8I5; A0A060YK07; B1Q383; I3IZU1; Q8JIP5; A0A146ZZE3; A4PDX4; I3JYT9; P87344; Q9W642; A0A060YBI3; B1Q385; A0A060YKE6; B1Q384; A0A060YK95; Q98TQ5; A0A061AD12; B7SVK2; I3IZY4; A0A0S7J8G1; Q33BP2; I3IZY3; Q8JIV4; A0A060YUR3; A0A060X…	687.358	1373.71	-0.214286	-0.000147183	100	65.1592
High	GTGGVDTASVGGVFDISNADR	B5DGP2	A0A0A1IVI8; Q7T306; G3PFW1; Q4RFW9; A0A0A1IV22; S0F2P2; H2L470; Q98SS7; A0A147ASA4; Q90X19; D0VBL9; A2BHA3; Q9YI14; Q9YI15; Q9YI16; B5DGP1; Q4STH0; A7XNJ0; Q6E461; A0A0A1IX88; G9FPD3; H9ZYM4; M4AU26; A0A0P7XIG3; Q9PV91; W5K1M2; G3PFX6; A0A0S7H2Q7; C1BIK3; I3KFP0; A3RH11; H1ZRL3; A0A0A1IW32; A0A087YJV3; F2X8C8; A7U8Z1; A0A0H4ADZ7; Q8JH38; C3UVH1; H3DNS1; A0A0S7H3J1; A0A0S7H793; A0A146WHL4; Q804Z1;…	997.977	1994.95	2.41973	0.00241361	100	65.1708
High	NGLMVAEIEELR	B1Q382; A0A087XQZ5; T2HFG0; Q8JIP5; P87344; B1Q385; Q98TQ5; Q33BP2	B1Q382; C4TIP2; C4TIP3; M3ZPQ1; A0A060YBV0; A0A060YS70; A0A0S7JAN2; Q91208; A0A060Y5W1; A0A087XQZ5; A0A060XRS6; T2HFG0; Q9IBD7; A0A0S7J8H5; A0A060YNF5; A0A060YKV8; A0A0S7J8I5; A0A060YK07; B1Q383; I3IZU1; Q8JIP5; A0A146ZZE3; A4PDX4; I3JYT9; P87344; Q9W642; A0A060YBI3; B1Q385; A0A060YKE6; B1Q384; A0A060YK95; Q98TQ5; A0A061AD12; B7SVK2; I3IZY4; A0A0S7J8G1; Q33BP2; I3IZY3; Q8JIV4; A0A060YUR3; A0A060X…	687.358	1373.71	-0.836318	-0.000574429	100	65.2044
High	LQGEVEDLMVDVER	B1Q382; P87344; B1Q385	B1Q382; A0A146UUF4; A0A146QJC9; A0A146UUW2; A0A146UUB4; B1Q383; P87344; A0A146ZJ51; B1Q385; B1Q384; A0A146UTU4	816.402	1631.8	1.55186	0.00126615	100	65.222
High	NGLMVAEIEELR	B1Q382; A0A087XQZ5; T2HFG0; Q8JIP5; P87344; B1Q385; Q98TQ5; Q33BP2	B1Q382; C4TIP2; C4TIP3; M3ZPQ1; A0A060YBV0; A0A060YS70; A0A0S7JAN2; Q91208; A0A060Y5W1; A0A087XQZ5; A0A060XRS6; T2HFG0; Q9IBD7; A0A0S7J8H5; A0A060YNF5; A0A060YKV8; A0A0S7J8I5; A0A060YK07; B1Q383; I3IZU1; Q8JIP5; A0A146ZZE3; A4PDX4; I3JYT9; P87344; Q9W642; A0A060YBI3; B1Q385; A0A060YKE6; B1Q384; A0A060YK95; Q98TQ5; A0A061AD12; B7SVK2; I3IZY4; A0A0S7J8G1; Q33BP2; I3IZY3; Q8JIV4; A0A060YUR3; A0A060X…	687.358	1373.71	-0.125424	-8.6148e-05	59.0856	65.2495
High	LQGEVEDLMVDVER	B1Q382; P87344; B1Q385	B1Q382; A0A146UUF4; A0A146QJC9; A0A146UUW2; A0A146UUB4; B1Q383; P87344; A0A146ZJ51; B1Q385; B1Q384; A0A146UTU4	816.4	1631.79	-0.692367	-0.0005649	69.3331	65.2544
High	VPTPNVSVVDLTVR	Q8AWX8	A0A0R4IGI1; A0A0S7GK17; A0A0U2ERZ3; J9TGM4; L7NL90; C6FGX0; A0A0M4UPB6; A0A060WQ18; C6FGU8; Q5I1Z5; C7SPG8; A0A146RLE8; A0A0P7VZ44; E7DP96; E3TEB6; B5X5Z9; Q8JIQ0; K4P8V9; G3Q4G2; A0A0S7I4M5; I3JIY6; F5BZT5; Q90ZF1; B5DGR2; B8PXF5; A0A096M2G8; G9FPD2; D7RF67; Q2A665; B7U6G4; I6YYG2; M4AAH8; Q8AWX8; A0A146VUG8; I3K556; U3M7S9; H9B644; Q4SND7; S4SRW0; W5KQB8; A0A087XT39; Q3S910; B5SXM1; B5XG76; A0A…	748.427	1495.85	-0.354997	-0.000265511	93.0856	65.2596
High	LQGEVEDLMVDVER	B1Q382; P87344; B1Q385	B1Q382; A0A146UUF4; A0A146QJC9; A0A146UUW2; A0A146UUB4; B1Q383; P87344; A0A146ZJ51; B1Q385; B1Q384; A0A146UTU4	816.4	1631.79	-0.692367	-0.0005649	67.3726	65.3031
High	EELDEIIEEVDEDGSGTIDFEEFLVMMVR	A0A060WZV7	F5BZS8; B9EP57; H2SBN2; B9VJM4; H2L8Q7; A0A146V9Q1; A0A146P9L9; I3IZI3; H2L8Q9; A0A060WZV7; Q4RB38; A0A060YT85; H2L8R0; A0A146ZN37; G3NJM6	1130.19	3388.56	8.27383	0.00934538	100	164.742
High	EELDEIIEEVDEDGSGTIDFEEFLVMMVR	A0A060WZV7	F5BZS8; B9EP57; H2SBN2; B9VJM4; H2L8Q7; A0A146V9Q1; A0A146P9L9; I3IZI3; H2L8Q9; A0A060WZV7; Q4RB38; A0A060YT85; H2L8R0; A0A146ZN37; G3NJM6	1130.18	3388.54	0.600601	0.000678386	100	164.626
High	VAEQELVDASERVGLLHSQNTSLINSK		Q789E7; Q90337	735.138	2937.53	0.79149	0.000581256	29.3033	67.4499
High	IIIGMDVAASEFYR	A0A0E9XJJ3	A0A146N5J7; A0A0E9XJJ3; A0A146XBN2; H2RQ53; A0A147AE36; Q4TBD1; A0A146XE41; A0A146PJU0; H3CAK5	792.908	1584.81	0.0563475	4.465e-05	31.6638	71.6329
High	NMWSAFPPDVAGNVDYK	I4BZJ0	Q90W42; Q8JH57; Q9IB28; Q9IB25; I6U9W3; I4BZJ0; Q90W47	955.941	1910.87	0.145283	0.000138809	30.0225	72.0506
High	NLQQEISDLTEQIGETGK	B1Q382; G9M5T1; A0A087XQZ5; W5L2L4; Q8JIP5; C0STL2; P87344; Q05K06; B1Q385; Q98TQ5; A0A0F8CGF3; H3DR28	B1Q382; F1R6C7; H3CMX1; Q90YF6; C4TIP2; A0A147A0M4; Q05K11; C4TIP3; A0A060ZE46; M3ZPQ1; B1PF34; A0A060YBV0; H3BX59; A0A146W4J3; G9M5T1; A0A0F8CX77; A0A060Y5W1; A0A087XQZ5; Q91520; W5ZLZ4; Q508P7; A4GWV4; H2ULB1; Q4RXH2; Q9IBD7; Q05K07; H3DB41; G0YU48; Q6SNT2; A0A087X5F9; A0A060YNF5; B8A561; Q05K09; Q05K08; A0A146W530; A0A146W7Q9; W5L2L4; A0A060YKV8; A0A0S7J8I5; G3NES6; G3NEV3; A0A060XSP7; Q4SSC7;…	1002	2002.99	0.411216	0.000411831	20.3566	72.6956
High	NLQQEISDLTEQLGETGK	T2HFG0; B3DJM6; W5L2L4; Q33BP2	A0A146QK60; A8R0Q2; A0A146Q5H9; A0A146RH13; A0A146RQV8; A0A146Y8S1; C4TIP1; A0A146Y712; A0A146U9E3; A0A146U920; A0A146SGF7; T2HFG0; Q90339; H2LPK6; B3DJM6; A0A146QN74; A0A146PEQ3; W5L2L4; A0A146Y6Z1; A0A059PBU4; A0A146T2L9; M4ASE4; Q90ZE5; Q6IQX1; A0A146RFI0; A0A146QM89; A0A146Y8N9; A0A146ZX56; A0A146QKX3; A0A146QL68; A0A146Y7G8; A0A146RGY8; A0A147ATZ3; A0A146Y8T1; A0A146PG34; A0A146Q7Y5; H2LNX8;…	1002	2002.99	0.411216	0.000411831	20.3566	72.6956
High	NLQQEISDLTEQLGETGK	T2HFG0; B3DJM6; W5L2L4; Q33BP2	A0A146QK60; A8R0Q2; A0A146Q5H9; A0A146RH13; A0A146RQV8; A0A146Y8S1; C4TIP1; A0A146Y712; A0A146U9E3; A0A146U920; A0A146SGF7; T2HFG0; Q90339; H2LPK6; B3DJM6; A0A146QN74; A0A146PEQ3; W5L2L4; A0A146Y6Z1; A0A059PBU4; A0A146T2L9; M4ASE4; Q90ZE5; Q6IQX1; A0A146RFI0; A0A146QM89; A0A146Y8N9; A0A146ZX56; A0A146QKX3; A0A146QL68; A0A146Y7G8; A0A146RGY8; A0A147ATZ3; A0A146Y8T1; A0A146PG34; A0A146Q7Y5; H2LNX8;…	668.336	2002.99	0.160727	0.000107312	17.2729	72.7515
High	NLQQEISDLTEQIGETGK	B1Q382; G9M5T1; A0A087XQZ5; W5L2L4; Q8JIP5; C0STL2; P87344; Q05K06; B1Q385; Q98TQ5; A0A0F8CGF3; H3DR28	B1Q382; F1R6C7; H3CMX1; Q90YF6; C4TIP2; A0A147A0M4; Q05K11; C4TIP3; A0A060ZE46; M3ZPQ1; B1PF34; A0A060YBV0; H3BX59; A0A146W4J3; G9M5T1; A0A0F8CX77; A0A060Y5W1; A0A087XQZ5; Q91520; W5ZLZ4; Q508P7; A4GWV4; H2ULB1; Q4RXH2; Q9IBD7; Q05K07; H3DB41; G0YU48; Q6SNT2; A0A087X5F9; A0A060YNF5; B8A561; Q05K09; Q05K08; A0A146W530; A0A146W7Q9; W5L2L4; A0A060YKV8; A0A0S7J8I5; G3NES6; G3NEV3; A0A060XSP7; Q4SSC7;…	668.336	2002.99	0.160727	0.000107312	17.2729	72.7515
High	NLQQEISDLTEQIGETGK	B1Q382; G9M5T1; A0A087XQZ5; W5L2L4; Q8JIP5; C0STL2; P87344; Q05K06; B1Q385; Q98TQ5; A0A0F8CGF3; H3DR28	B1Q382; F1R6C7; H3CMX1; Q90YF6; C4TIP2; A0A147A0M4; Q05K11; C4TIP3; A0A060ZE46; M3ZPQ1; B1PF34; A0A060YBV0; H3BX59; A0A146W4J3; G9M5T1; A0A0F8CX77; A0A060Y5W1; A0A087XQZ5; Q91520; W5ZLZ4; Q508P7; A4GWV4; H2ULB1; Q4RXH2; Q9IBD7; Q05K07; H3DB41; G0YU48; Q6SNT2; A0A087X5F9; A0A060YNF5; B8A561; Q05K09; Q05K08; A0A146W530; A0A146W7Q9; W5L2L4; A0A060YKV8; A0A0S7J8I5; G3NES6; G3NEV3; A0A060XSP7; Q4SSC7;…	668.336	2002.99	0.0693108	4.62764e-05	22.0734	72.7991
High	NLQQEISDLTEQLGETGK	T2HFG0; B3DJM6; W5L2L4; Q33BP2	A0A146QK60; A8R0Q2; A0A146Q5H9; A0A146RH13; A0A146RQV8; A0A146Y8S1; C4TIP1; A0A146Y712; A0A146U9E3; A0A146U920; A0A146SGF7; T2HFG0; Q90339; H2LPK6; B3DJM6; A0A146QN74; A0A146PEQ3; W5L2L4; A0A146Y6Z1; A0A059PBU4; A0A146T2L9; M4ASE4; Q90ZE5; Q6IQX1; A0A146RFI0; A0A146QM89; A0A146Y8N9; A0A146ZX56; A0A146QKX3; A0A146QL68; A0A146Y7G8; A0A146RGY8; A0A147ATZ3; A0A146Y8T1; A0A146PG34; A0A146Q7Y5; H2LNX8;…	668.336	2002.99	0.0693108	4.62764e-05	22.0734	72.7991
High	NLQQEISDLTEQLGETGK	T2HFG0; B3DJM6; W5L2L4; Q33BP2	A0A146QK60; A8R0Q2; A0A146Q5H9; A0A146RH13; A0A146RQV8; A0A146Y8S1; C4TIP1; A0A146Y712; A0A146U9E3; A0A146U920; A0A146SGF7; T2HFG0; Q90339; H2LPK6; B3DJM6; A0A146QN74; A0A146PEQ3; W5L2L4; A0A146Y6Z1; A0A059PBU4; A0A146T2L9; M4ASE4; Q90ZE5; Q6IQX1; A0A146RFI0; A0A146QM89; A0A146Y8N9; A0A146ZX56; A0A146QKX3; A0A146QL68; A0A146Y7G8; A0A146RGY8; A0A147ATZ3; A0A146Y8T1; A0A146PG34; A0A146Q7Y5; H2LNX8;…	1002	2002.99	-0.868607	-0.000869907	12.2771	72.8354
High	NLQQEISDLTEQIGETGK	B1Q382; G9M5T1; A0A087XQZ5; W5L2L4; Q8JIP5; C0STL2; P87344; Q05K06; B1Q385; Q98TQ5; A0A0F8CGF3; H3DR28	B1Q382; F1R6C7; H3CMX1; Q90YF6; C4TIP2; A0A147A0M4; Q05K11; C4TIP3; A0A060ZE46; M3ZPQ1; B1PF34; A0A060YBV0; H3BX59; A0A146W4J3; G9M5T1; A0A0F8CX77; A0A060Y5W1; A0A087XQZ5; Q91520; W5ZLZ4; Q508P7; A4GWV4; H2ULB1; Q4RXH2; Q9IBD7; Q05K07; H3DB41; G0YU48; Q6SNT2; A0A087X5F9; A0A060YNF5; B8A561; Q05K09; Q05K08; A0A146W530; A0A146W7Q9; W5L2L4; A0A060YKV8; A0A0S7J8I5; G3NES6; G3NEV3; A0A060XSP7; Q4SSC7;…	1002	2002.99	-0.868607	-0.000869907	12.2771	72.8354
High	DLSELQGLIDAHFEGR	Q8JJ07	Q8JJ07	600.636	1799.89	0.030336	1.82005e-05	14.9241	73.8013
High	GDVVSILLELQAK	P80429	B9U452; P80426; B5X2B3; P80429	692.907	1384.81	1.15037	0.000796516	32.8571	73.9931
High	MLGQNPTREELDEIIEEVDEDGSGTIDFEEFLVMMVR	A0A060WZV7	F5BZS8; B9EP57; H2SBN2; B9VJM4; H2L8Q7; A0A146V9Q1; A0A146P9L9; I3IZI3; H2L8Q9; A0A060WZV7; Q4RB38; A0A060YT85; H2L8R0; A0A146ZN37; G3NJM6	1072.25	4285.98	-1.70093	-0.00182254	99.6905	158.695
High	MLGQNPTREELDEIIEEVDEDGSGTIDFEEFLVMMVR	A0A060WZV7	F5BZS8; B9EP57; H2SBN2; B9VJM4; H2L8Q7; A0A146V9Q1; A0A146P9L9; I3IZI3; H2L8Q9; A0A060WZV7; Q4RB38; A0A060YT85; H2L8R0; A0A146ZN37; G3NJM6	1429.33	4285.99	0.794315	0.00113481	96.3465	158.656
High	AGDSDGDGAIGVEEWAVLVK	A5I873	A5I873	994.485	1987.96	1.4199	0.00141136	19.8872	74.5651
High	EELDEIIEEVDEDGSGTIDFEEFLVMMVR	A0A060WZV7	F5BZS8; B9EP57; H2SBN2; B9VJM4; H2L8Q7; A0A146V9Q1; A0A146P9L9; I3IZI3; H2L8Q9; A0A060WZV7; Q4RB38; A0A060YT85; H2L8R0; A0A146ZN37; G3NJM6	1130.18	3388.52	-2.96583	-0.00334993	100	161.425
High	EELDEIIEEVDEDGSGTIDFEEFLVMMVR	A0A060WZV7	F5BZS8; B9EP57; H2SBN2; B9VJM4; H2L8Q7; A0A146V9Q1; A0A146P9L9; I3IZI3; H2L8Q9; A0A060WZV7; Q4RB38; A0A060YT85; H2L8R0; A0A146ZN37; G3NJM6	1130.18	3388.53	-1.34472	-0.00151888	100	161.47
High	VPAHAVITRPETRGDVVSILLELQAK	P80429	B9U452; P80426; B5X2B3; P80429	563.326	2812.6	-1.24437	-0.000699984	24.7739	70.2808
High	EELDEIIEEVDEDGSGTIDFEEFLVMMVR	A0A060WZV7	F5BZS8; B9EP57; H2SBN2; B9VJM4; H2L8Q7; A0A146V9Q1; A0A146P9L9; I3IZI3; H2L8Q9; A0A060WZV7; Q4RB38; A0A060YT85; H2L8R0; A0A146ZN37; G3NJM6	1130.18	3388.54	1.0329	0.00116667	100	161.509
High	VAEQELVDASERVGLLHSQNTSLLNSK	P87344	P87344	735.138	2937.53	0.79149	0.000581256	29.3033	67.4499
High	LVTWYDNEFGYSNR	Q8AWX8	A0A0R4IGI1; A0A0U2ERZ3; J9TGM4; L7NL90; A0A0P7VZ44; E3TEB6; Q90ZF1; B5DGR2; Q2A665; Q8AWX8; H9B644; Q4SND7; H3CRI0; Q5XJ10; Q90Z48; W5LI76; G3KG80; B5DGR3; A1IGU6; Q155W8; H2S8H3; A4PIV5; B5DGR5; E3TDV1; D6BNU6; A0A060Y387; E3TCG5; E0YDW5; A0A060Y562	882.403	1763.8	-2.39916	-0.00211582	30.3727	67.7473
High	LVTWYDNEFGYSNR	Q8AWX8	A0A0R4IGI1; A0A0U2ERZ3; J9TGM4; L7NL90; A0A0P7VZ44; E3TEB6; Q90ZF1; B5DGR2; Q2A665; Q8AWX8; H9B644; Q4SND7; H3CRI0; Q5XJ10; Q90Z48; W5LI76; G3KG80; B5DGR3; A1IGU6; Q155W8; H2S8H3; A4PIV5; B5DGR5; E3TDV1; D6BNU6; A0A060Y387; E3TCG5; E0YDW5; A0A060Y562	882.408	1763.81	3.27595	0.00288906	58.3503	67.8403
High	MLGQNPTREELDEIIEEVDEDGSGTIDFEEFLVMMVR	A0A060WZV7	F5BZS8; B9EP57; H2SBN2; B9VJM4; H2L8Q7; A0A146V9Q1; A0A146P9L9; I3IZI3; H2L8Q9; A0A060WZV7; Q4RB38; A0A060YT85; H2L8R0; A0A146ZN37; G3NJM6	1429.34	4286.01	6.68994	0.00955766	100	161.827
High	NADGYIDREEFAIIIR	A0A060WZV7	B9EP57; A0A060WZV7; B5DG86; A0A060YT85	632.327	1894.97	-0.17127	-0.000108184	55.3254	68.0932
High	GADPEDVIVAAFK	Q9DEA8	E3TEI4; Q9DEA8; Q9IB20	666.347	1331.69	1.72076	0.00114575	25.0069	68.1353
High	AISEELDHALNDMTSL	A0A087XSB4	G3PBG3; H2RS11; A0A146VDU0; H2RS10; I3J232; Q805C5; Q1LXM1; H2MRC9; H2RS09; Q91489; H2RS08; A0A087XSB4; A0A060WIN1; A0A0F8D2I6; A0A146VDT9; F1QKG7	879.914	1758.82	-0.414482	-0.0003645	27.8906	68.9018
High	IGVDEFGAMIK	A5I874	E1UIZ8; A5I874	590.307	1179.61	-1.2298	-0.00072534	92.3437	63.1356
High	AISEELDHALNDMTSI	D6PVP3; Q8AV86; Q8JIM7; A0A087YEU9; A0A087YF71; P13104; E3TFQ0; H2MA79	H3CSI6; A0A0S7K1B6; K4PEK4; D6PVP3; E3TC29; G1FCF2; Q6P0W3; Q8AV86; Q8JIM7; H2M5M4; X2J4M2; Q805D2; I3J2Q1; A0A146W5R6; F6NVA3; W5KS79; Q8JIM8; A0A146NCI0; A0A0S7FXE9; Q91490; I3JVV2; W5JYT8; A0A087YEU9; A0A087YF71; A0A146WFT2; A0A146YH85; P13104; W5UMT9; A0A087XA45; Q76CT4; Q7ZVK9; Q9DEB7; B9V2W9; E3TFQ0; H2MA79; H2TF14; F2WR17; W5JZC9; H3C493	879.914	1758.82	-0.414482	-0.0003645	27.8906	68.9018
High	MLGQNPTREELDEIIEEVDEDGSGTIDFEEFLVMMVR	A0A060WZV7	F5BZS8; B9EP57; H2SBN2; B9VJM4; H2L8Q7; A0A146V9Q1; A0A146P9L9; I3IZI3; H2L8Q9; A0A060WZV7; Q4RB38; A0A060YT85; H2L8R0; A0A146ZN37; G3NJM6	1429.33	4285.97	-2.79433	-0.00399215	100	161.783
High	MLGQNPTREELDEIIEEVDEDGSGTIDFEEFLVMMVR	A0A060WZV7	F5BZS8; B9EP57; H2SBN2; B9VJM4; H2L8Q7; A0A146V9Q1; A0A146P9L9; I3IZI3; H2L8Q9; A0A060WZV7; Q4RB38; A0A060YT85; H2L8R0; A0A146ZN37; G3NJM6	1429.33	4285.99	0.794315	0.00113481	100	161.75
High	MQLSQSLDNLQQFADSTSK	B5XFF2	B5XFF2; P27007	1071.01	2141.02	0.317231	0.000339598	18.8946	69.0778
High	MLGQNPTREELDEIIEEVDEDGSGTIDFEEFLVMMVR	A0A060WZV7	F5BZS8; B9EP57; H2SBN2; B9VJM4; H2L8Q7; A0A146V9Q1; A0A146P9L9; I3IZI3; H2L8Q9; A0A060WZV7; Q4RB38; A0A060YT85; H2L8R0; A0A146ZN37; G3NJM6	1429.33	4285.96	-4.5032	-0.00643355	100	161.706
High	EELDEIIEEVDEDGSGTIDFEEFLVMMVR	A0A060WZV7	F5BZS8; B9EP57; H2SBN2; B9VJM4; H2L8Q7; A0A146V9Q1; A0A146P9L9; I3IZI3; H2L8Q9; A0A060WZV7; Q4RB38; A0A060YT85; H2L8R0; A0A146ZN37; G3NJM6	1130.18	3388.53	-0.804355	-0.000908528	100	161.547
High	VFDKNADGYIDREEFAIIIR	A0A060WZV7	B9EP57; A0A060WZV7; B5DG86; A0A060YT85	596.811	2384.22	-1.21931	-0.000726774	14.5255	69.9295
High	VFDKNADGYIDREEFAIIIR	A0A060WZV7	B9EP57; A0A060WZV7; B5DG86; A0A060YT85	596.811	2384.22	-0.195322	-0.000116423	14.8431	69.9645
High	MQLSQSLDNLQQFADSTSK	B5XFF2	B5XFF2; P27007	1071.01	2141.02	0.2032	0.000217528	24.0728	68.9536
High	LESDLVQVQGEVDDSVQEAR	P87344	P87344; Q8JIV4	1108.54	2216.07	-0.346474	-0.000383905	100	62.9242
High	LESDLVQVQGEVDDSVQEAR	P87344	P87344; Q8JIV4	1108.54	2216.07	0.75521	0.000836798	100	62.8775
High	LESDLVQVQGEVDDSVQEAR	P87344	P87344; Q8JIV4	1108.54	2216.07	0.0941995	0.000104376	100	62.8491
High	GTEDELDKYSEALKDAQEK	D6PVP3; H2LUJ8; Q8AV86; A0A0F8AT58; A0A146W5Y8; A0A0S7K258; A0A087YF71; E3TFQ0; A0A0F8CF82	A0A0S7K1B6; K4PEK4; D6PVP3; H2LUJ8; G1FCF2; Q6P0W3; A0A060WR17; Q8AV86; G3P8Z9; F8U085; G3N8Q3; X2J4M2; A0A146ZYU7; A0A146W5S1; A0A146W5R6; F6NVA3; A5WW36; A0A0F8AT58; I3KDN0; A0A147AVZ3; Q91489; E7FBZ3; G3P8Z5; B9EMY1; A0A146NCI0; Q91490; A0A146W5Y8; A0A146W2Z9; A0A0S7K258; M4AQP3; A0A087YF71; A0A0S7MHR3; I3ISQ1; A0A087XA45; Q805C6; A0A0P7WKP3; Q76CT4; Q7ZVK9; A0A060WCS0; A0A0P7YL18; Q9DEB7; A0A…	723.679	2169.02	1.10643	0.000799959	85.1279	58.5592
High	LFLQNFGAGAR	L7YEM5	L7YEM5	597.325	1193.64	-0.564874	-0.000337129	54.1354	58.5923
High	DLRVVAEGVLVK	A0A060XSW8; P98093	A0A060XSW8; P98093	433.266	1297.78	0.756454	0.000327238	100	58.66
High	EELDEIIEEVDEDGSGTIDFEEFLVMMVR	A0A060WZV7	F5BZS8; B9EP57; H2SBN2; B9VJM4; H2L8Q7; A0A146V9Q1; A0A146P9L9; I3IZI3; H2L8Q9; A0A060WZV7; Q4RB38; A0A060YT85; H2L8R0; A0A146ZN37; G3NJM6	1130.18	3388.53	-2.42546	-0.00273958	100	167.373
High	EELDEIIEEVDEDGSGTIDFEEFLVMMVR	A0A060WZV7	F5BZS8; B9EP57; H2SBN2; B9VJM4; H2L8Q7; A0A146V9Q1; A0A146P9L9; I3IZI3; H2L8Q9; A0A060WZV7; Q4RB38; A0A060YT85; H2L8R0; A0A146ZN37; G3NJM6	1130.18	3388.53	-0.804355	-0.000908528	100	166.971
High	EELDEIIEEVDEDGSGTIDFEEFLVMMVR	A0A060WZV7	F5BZS8; B9EP57; H2SBN2; B9VJM4; H2L8Q7; A0A146V9Q1; A0A146P9L9; I3IZI3; H2L8Q9; A0A060WZV7; Q4RB38; A0A060YT85; H2L8R0; A0A146ZN37; G3NJM6	1130.18	3388.54	1.89748	0.00214323	100	165.668
High	KMEGDxNEMEIQLSHANR		C9W8L8	529.504	2114.99	-0.69245	-0.000366132	100	58.8647
High	KMEGDLNEMEIQLSHANR	B1Q382; G9M5T1; A0A087XQZ5; B3DJM6; W5L2L4; H2UN88; P87344; Q05K06; B1Q385; D6PVQ0; Q98TQ5; A0A0F8CGF3; H3DR28; Q33BP2	A0A146QK60; A8R0Q2; Q05K05; H2LNV3; B1Q382; G3N9L2; F1R6C7; H3CMX1; Q90YF6; C4TIP2; A0A147A0M4; Q05K11; A0A087YKG8; H3CE06; C4TIP3; A0A146SNL8; A0A146Q5H9; A0A0F8C274; M3ZPQ1; A8R0Q7; Q4RXH7; A0A146RH13; Q4T6M5; B1PF34; H3DB42; A0A146RQV8; A0A060YBV0; H3BX59; A0A0S7JAN2; G9M5T1; A0A087XQZ5; A0A0S7K7R5; A0A146Y740; Q91520; A0A146Y8S1; C4TIP1; A0A146Y712; A0A146U9E3; Q98TQ4; A0A146U920; Q508P7; A0A…	529.504	2114.99	-0.69245	-0.000366132	100	58.8647
High	KMEGDxNEMEIQLSHANR		C9W8L8	529.504	2114.99	-1.50048	-0.000793378	100	58.904
High	KMEGDLNEMEIQLSHANR	B1Q382; G9M5T1; A0A087XQZ5; B3DJM6; W5L2L4; H2UN88; P87344; Q05K06; B1Q385; D6PVQ0; Q98TQ5; A0A0F8CGF3; H3DR28; Q33BP2	A0A146QK60; A8R0Q2; Q05K05; H2LNV3; B1Q382; G3N9L2; F1R6C7; H3CMX1; Q90YF6; C4TIP2; A0A147A0M4; Q05K11; A0A087YKG8; H3CE06; C4TIP3; A0A146SNL8; A0A146Q5H9; A0A0F8C274; M3ZPQ1; A8R0Q7; Q4RXH7; A0A146RH13; Q4T6M5; B1PF34; H3DB42; A0A146RQV8; A0A060YBV0; H3BX59; A0A0S7JAN2; G9M5T1; A0A087XQZ5; A0A0S7K7R5; A0A146Y740; Q91520; A0A146Y8S1; C4TIP1; A0A146Y712; A0A146U9E3; Q98TQ4; A0A146U920; Q508P7; A0A…	529.504	2114.99	-1.50048	-0.000793378	100	58.904
High	KMEGDLNEMEIQLSHANR	B1Q382; G9M5T1; A0A087XQZ5; B3DJM6; W5L2L4; H2UN88; P87344; Q05K06; B1Q385; D6PVQ0; Q98TQ5; A0A0F8CGF3; H3DR28; Q33BP2	A0A146QK60; A8R0Q2; Q05K05; H2LNV3; B1Q382; G3N9L2; F1R6C7; H3CMX1; Q90YF6; C4TIP2; A0A147A0M4; Q05K11; A0A087YKG8; H3CE06; C4TIP3; A0A146SNL8; A0A146Q5H9; A0A0F8C274; M3ZPQ1; A8R0Q7; Q4RXH7; A0A146RH13; Q4T6M5; B1PF34; H3DB42; A0A146RQV8; A0A060YBV0; H3BX59; A0A0S7JAN2; G9M5T1; A0A087XQZ5; A0A0S7K7R5; A0A146Y740; Q91520; A0A146Y8S1; C4TIP1; A0A146Y712; A0A146U9E3; Q98TQ4; A0A146U920; Q508P7; A0A…	529.504	2114.99	-0.807883	-0.000427167	79.7726	58.9561
High	KMEGDxNEMEIQLSHANR		C9W8L8	529.504	2114.99	-0.807883	-0.000427167	79.7726	58.9561
High	EELDEIIEEVDEDGSGTIDFEEFLVMMVR	A0A060WZV7	F5BZS8; B9EP57; H2SBN2; B9VJM4; H2L8Q7; A0A146V9Q1; A0A146P9L9; I3IZI3; H2L8Q9; A0A060WZV7; Q4RB38; A0A060YT85; H2L8R0; A0A146ZN37; G3NJM6	1130.18	3388.51	-5.66767	-0.00640169	100	165.131
High	EELDEIIEEVDEDGSGTIDFEEFLVMMVR	A0A060WZV7	F5BZS8; B9EP57; H2SBN2; B9VJM4; H2L8Q7; A0A146V9Q1; A0A146P9L9; I3IZI3; H2L8Q9; A0A060WZV7; Q4RB38; A0A060YT85; H2L8R0; A0A146ZN37; G3NJM6	1130.18	3388.53	-0.263987	-0.000298176	100	155.211
High	EELDEIIEEVDEDGSGTIDFEEFLVMMVR	A0A060WZV7	F5BZS8; B9EP57; H2SBN2; B9VJM4; H2L8Q7; A0A146V9Q1; A0A146P9L9; I3IZI3; H2L8Q9; A0A060WZV7; Q4RB38; A0A060YT85; H2L8R0; A0A146ZN37; G3NJM6	1130.18	3388.54	2.00556	0.0022653	100	165.104
High	LFLQNFGAGAR	L7YEM5	L7YEM5	597.325	1193.64	-0.155806	-9.29884e-05	53.6455	58.5429
High	GTEDELDKYSEALKDAQEK	D6PVP3; H2LUJ8; Q8AV86; A0A0F8AT58; A0A146W5Y8; A0A0S7K258; A0A087YF71; E3TFQ0; A0A0F8CF82	A0A0S7K1B6; K4PEK4; D6PVP3; H2LUJ8; G1FCF2; Q6P0W3; A0A060WR17; Q8AV86; G3P8Z9; F8U085; G3N8Q3; X2J4M2; A0A146ZYU7; A0A146W5S1; A0A146W5R6; F6NVA3; A5WW36; A0A0F8AT58; I3KDN0; A0A147AVZ3; Q91489; E7FBZ3; G3P8Z5; B9EMY1; A0A146NCI0; Q91490; A0A146W5Y8; A0A146W2Z9; A0A0S7K258; M4AQP3; A0A087YF71; A0A0S7MHR3; I3ISQ1; A0A087XA45; Q805C6; A0A0P7WKP3; Q76CT4; Q7ZVK9; A0A060WCS0; A0A0P7YL18; Q9DEB7; A0A…	723.677	2169.02	-1.42612	-0.0010311	100	58.5028
High	LFLQNFGAGAR	L7YEM5	L7YEM5	597.325	1193.64	-0.258073	-0.000154024	100	58.4587
High	IAELENQLQETRDQLNEK	A0A061A7B4	A0A061A7B4	724.368	2171.09	-1.47106	-0.0010646	100	58.1908
High	GGDDLDPNYVLSSR	B5DGP2	Q7T306; H3BY99; G3PFW1; Q4RFW9; H3C576; S0F2P2; H2L470; C1BWW9; A0A147ASA4; Q90X19; D0VBL9; G3Q9S7; A2BHA3; A7X9Z7; H2MUF3; A0A0R4IU65; Q8AY63; H3D4C2; Q08BV6; F8U028; Q9YI15; Q9YI16; B5DGP1; Q4STH0; B8JJ23; G9FPD3; H9ZYM4; A0A0E3TVC9; M4AU26; W5K1M2; A0A0P7Y1V2; G3PFX6; A0A0S7H2Q7; C1BIK3; I3KFP0; Q4S6F5; W5K2T2; A3RH11; I3K3E7; H1ZRL3; A0A087YJV3; F2X8C8; A7U8Z1; A0A0H4ADZ7; A0A0R4IGD0; Q8JH38;…	754.355	1507.7	0.0753444	5.67984e-05	100	56.8672
High	VFDKDGNGYISAAELR	A0A0F8AUE5	A0A146X7J1; B5XCM2; Q6R520; C1BHV5; H3DI88; A0A146R5I5; G3PGF2; A0A0P7ULQ0; G3P4Z6; Q20AK9; Q4JJ85; A0A060WZJ2; A0A147AAY6; A0A0F8ANM6; A0A060WVU0; X5DD20; I3IXY6; A0A060Y0G1; A0A0P7XGF1; F1C7D1; E3TFE6; C1BXP0; D2KX31; A0A060W7T8; A0A0P7XV73; A0A0P7UK75; H3CDX1; A0A060XPD1; A0A0P7UM01; A0A060WIX3; A0A060XT19; C1BIJ2; G3NDL7; Q7T3T2; A0A146TMD7; M9TJ14; P62150; Q4JJ74; A0A146NRJ8; Q4RN51; A2Q0R2;…	585.629	1754.87	0.784497	0.000458897	100	56.9006
High	EELDEIIEEVDEDGSGTIDFEEFLVMMVR	A0A060WZV7	F5BZS8; B9EP57; H2SBN2; B9VJM4; H2L8Q7; A0A146V9Q1; A0A146P9L9; I3IZI3; H2L8Q9; A0A060WZV7; Q4RB38; A0A060YT85; H2L8R0; A0A146ZN37; G3NJM6	1130.18	3388.53	0.168307	0.000190105	100	167.695
High	EELDEIIEEVDEDGSGTIDFEEFLVMMVR	A0A060WZV7	F5BZS8; B9EP57; H2SBN2; B9VJM4; H2L8Q7; A0A146V9Q1; A0A146P9L9; I3IZI3; H2L8Q9; A0A060WZV7; Q4RB38; A0A060YT85; H2L8R0; A0A146ZN37; G3NJM6	1130.19	3388.54	2.654	0.00299772	100	167.668
High	VFDKDGNGYISAAELR	A0A0F8AUE5	A0A146X7J1; B5XCM2; Q6R520; C1BHV5; H3DI88; A0A146R5I5; G3PGF2; A0A0P7ULQ0; G3P4Z6; Q20AK9; Q4JJ85; A0A060WZJ2; A0A147AAY6; A0A0F8ANM6; A0A060WVU0; X5DD20; I3IXY6; A0A060Y0G1; A0A0P7XGF1; F1C7D1; E3TFE6; C1BXP0; D2KX31; A0A060W7T8; A0A0P7XV73; A0A0P7UK75; H3CDX1; A0A060XPD1; A0A0P7UM01; A0A060WIX3; A0A060XT19; C1BIJ2; G3NDL7; Q7T3T2; A0A146TMD7; M9TJ14; P62150; Q4JJ74; A0A146NRJ8; Q4RN51; A2Q0R2;…	585.628	1754.87	-0.0502338	-2.93846e-05	100	56.9475
High	GESGPPGPAGFAGPPGADGQPGAK	G3NNI9	G3NNK6; G3NNI9; G3NNJ9; Q5NT96; A0A0F8B7E5	692.665	2075.98	1.53619	0.00106303	100	57.0754
High	TIDDLEDELYAQK	D6PVP3; Q8AV86; Q8JIM7; Q5SPK6; H2SQV9; A0A087YEU9; A0A087YF71; P13104; A0A0F8CF82	K4PEK4; A0A060WJN0; D6PVP3; H2SQW0; A0A060WLJ6; H3DQ99; G1FCF2; Q6P0W3; Q8AV86; Q5SPK5; W5K5N7; Q8JIM7; H2M5M4; X2J4M2; I3J2Q1; A0A0P7TWT7; W5KS79; A0A147AVZ3; Q4RB49; A0A146NCI0; Q5SPK6; A0A060WRJ2; Q4SAI3; A0A0S7FXE9; Q91490; I3JVV2; W5JYT8; H2SQV9; A0A087YEU9; A0A087YF71; A0A146WFT2; A0A146YH85; A0A060W8G0; P13104; Q91472; Q805C6; Q76CT4; Q9DEB7; G3PVL1; B9V2W9; A0A060X9W2; A0A0F8CF82; F2WR17;…	776.872	1552.74	-0.386958	-0.000300422	100	57.377
High	GVEDELDKYSESLK	A0A147AWH1	A0A0S7FPU0; A0A146YIJ7; A0A0R4INL7; A0A0R4IM99; B9ELP6; Q805C7; Q4T142; H2TYG2; B5X1U5; H2TYG5; Q6IQD7; Q805C8; A0A147A1D8; H2TYG4; B9EPX8; A0A147AWH1; I3K0E5; H2MCV5; H3CHP2; A0A0P7UYH2; M3ZZE4; A0A060YU53; G3Q407; A0A146YII9; G3Q402; H3DQ51; G3Q3Z9	537.929	1611.77	-1.67136	-0.000897954	100	59.1506
High	TIDDLEDELYAQK	D6PVP3; Q8AV86; Q8JIM7; Q5SPK6; H2SQV9; A0A087YEU9; A0A087YF71; P13104; A0A0F8CF82	K4PEK4; A0A060WJN0; D6PVP3; H2SQW0; A0A060WLJ6; H3DQ99; G1FCF2; Q6P0W3; Q8AV86; Q5SPK5; W5K5N7; Q8JIM7; H2M5M4; X2J4M2; I3J2Q1; A0A0P7TWT7; W5KS79; A0A147AVZ3; Q4RB49; A0A146NCI0; Q5SPK6; A0A060WRJ2; Q4SAI3; A0A0S7FXE9; Q91490; I3JVV2; W5JYT8; H2SQV9; A0A087YEU9; A0A087YF71; A0A146WFT2; A0A146YH85; A0A060W8G0; P13104; Q91472; Q805C6; Q76CT4; Q9DEB7; G3PVL1; B9V2W9; A0A060X9W2; A0A0F8CF82; F2WR17;…	776.872	1552.74	-0.54419	-0.000422492	100	57.4174
High	AALNMYIAQVK	B5XFF2	B5XFF2; P27007	611.337	1221.67	0.0475774	2.90619e-05	100	57.7461
High	AALNMYIAQVK	B5XFF2	B5XFF2; P27007	611.336	1221.66	-1.05156	-0.000642325	100	57.7855
High	DLEESTLQHEATAAALR	A0A087XQZ5; T2HFG0; B3DJM6; W5L2L4; H2UN88; Q8JIP5; C0STL2; P87344; Q05K06; B1Q385; A0A0F8CGF3; H3DR28	A8R0Q2; Q05K05; H2LNV3; G3N9L7; Q789E7; G3N9L2; F1R6C7; H3CNF0; H3CMX1; Q05K11; Q2PMW9; Q4RXH7; B1PF34; H3DB42; A0A060YBV0; H3BX59; A0A0F8BDK2; A0A0F8CX77; A0A087XQZ5; Q90337; Q98TQ4; Q508P7; H2ULB1; T2HFG0; Q90339; Q4RXH6; H2LPK6; Q05K07; H3DB41; H2UKY1; A0A060YNF5; B8A561; B3DJM6; G3N9K5; Q05K09; Q4ST82; Q05K08; A0A0F8BAD9; H2LNV4; W5L2L4; H2LP40; A0A0F8AFI5; Q6QUR6; A0A059PBU4; Q90ZE5; A0A060X…	618.978	1854.92	-0.313866	-0.000194065	77.8747	57.8303
High	DLEESTLQHEATAAALR	A0A087XQZ5; T2HFG0; B3DJM6; W5L2L4; H2UN88; Q8JIP5; C0STL2; P87344; Q05K06; B1Q385; A0A0F8CGF3; H3DR28	A8R0Q2; Q05K05; H2LNV3; G3N9L7; Q789E7; G3N9L2; F1R6C7; H3CNF0; H3CMX1; Q05K11; Q2PMW9; Q4RXH7; B1PF34; H3DB42; A0A060YBV0; H3BX59; A0A0F8BDK2; A0A0F8CX77; A0A087XQZ5; Q90337; Q98TQ4; Q508P7; H2ULB1; T2HFG0; Q90339; Q4RXH6; H2LPK6; Q05K07; H3DB41; H2UKY1; A0A060YNF5; B8A561; B3DJM6; G3N9K5; Q05K09; Q4ST82; Q05K08; A0A0F8BAD9; H2LNV4; W5L2L4; H2LP40; A0A0F8AFI5; Q6QUR6; A0A059PBU4; Q90ZE5; A0A060X…	618.977	1854.92	-0.70872	-0.000438206	48.4746	57.8804
High	DLEESTLQHEATAAALR	A0A087XQZ5; T2HFG0; B3DJM6; W5L2L4; H2UN88; Q8JIP5; C0STL2; P87344; Q05K06; B1Q385; A0A0F8CGF3; H3DR28	A8R0Q2; Q05K05; H2LNV3; G3N9L7; Q789E7; G3N9L2; F1R6C7; H3CNF0; H3CMX1; Q05K11; Q2PMW9; Q4RXH7; B1PF34; H3DB42; A0A060YBV0; H3BX59; A0A0F8BDK2; A0A0F8CX77; A0A087XQZ5; Q90337; Q98TQ4; Q508P7; H2ULB1; T2HFG0; Q90339; Q4RXH6; H2LPK6; Q05K07; H3DB41; H2UKY1; A0A060YNF5; B8A561; B3DJM6; G3N9K5; Q05K09; Q4ST82; Q05K08; A0A0F8BAD9; H2LNV4; W5L2L4; H2LP40; A0A0F8AFI5; Q6QUR6; A0A059PBU4; Q90ZE5; A0A060X…	618.977	1854.92	-1.20229	-0.000743382	100	57.931
High	DLEESTLQHEATAAALR	A0A087XQZ5; T2HFG0; B3DJM6; W5L2L4; H2UN88; Q8JIP5; C0STL2; P87344; Q05K06; B1Q385; A0A0F8CGF3; H3DR28	A8R0Q2; Q05K05; H2LNV3; G3N9L7; Q789E7; G3N9L2; F1R6C7; H3CNF0; H3CMX1; Q05K11; Q2PMW9; Q4RXH7; B1PF34; H3DB42; A0A060YBV0; H3BX59; A0A0F8BDK2; A0A0F8CX77; A0A087XQZ5; Q90337; Q98TQ4; Q508P7; H2ULB1; T2HFG0; Q90339; Q4RXH6; H2LPK6; Q05K07; H3DB41; H2UKY1; A0A060YNF5; B8A561; B3DJM6; G3N9K5; Q05K09; Q4ST82; Q05K08; A0A0F8BAD9; H2LNV4; W5L2L4; H2LP40; A0A0F8AFI5; Q6QUR6; A0A059PBU4; Q90ZE5; A0A060X…	618.978	1854.92	-0.0177257	-1.09599e-05	33.221	57.9835
High	EELDEIIEEVDEDGSGTIDFEEFLVMMVR	A0A060WZV7	F5BZS8; B9EP57; H2SBN2; B9VJM4; H2L8Q7; A0A146V9Q1; A0A146P9L9; I3IZI3; H2L8Q9; A0A060WZV7; Q4RB38; A0A060YT85; H2L8R0; A0A146ZN37; G3NJM6	1130.18	3388.53	-0.480134	-0.000542317	100	167.634
High	GTLDDYVEGLR	Q9IB19	A0A060YVD3; B5DGT3; Q90WC6; B5DGT2; Q9IB19	619.306	1237.61	-0.31578	-0.000195406	100	57.6253
High	MLGQNPTREELDEIIEEVDEDGSGTIDFEEFLVMMVR	A0A060WZV7	F5BZS8; B9EP57; H2SBN2; B9VJM4; H2L8Q7; A0A146V9Q1; A0A146P9L9; I3IZI3; H2L8Q9; A0A060WZV7; Q4RB38; A0A060YT85; H2L8R0; A0A146ZN37; G3NJM6	1429.33	4285.97	-1.769	-0.0025273	100	158.617
High	KQADSVAELGEQIDNLQR	B1Q382; G9M5T1; A0A087XQZ5; B3DJM6; W5L2L4; H2UN88; Q8JIP5; C0STL2; P87344; Q05K06; B1Q385; A0A060Y971; Q98TQ5; A0A0F8CGF3; H3DR28	W5KA98; A0A146QK60; A8R0Q2; Q05K05; H2LNV3; G3N9L7; B1Q382; Q789E7; G3N9L2; F1R6C7; H3CNF0; H3CMX1; C4TIP2; A0A147A0M4; Q05K11; A0A087YKG8; C4TIP3; A0A0S7LIY8; A0A146Q5H9; Q2PMW9; A8R0Q7; Q4RXH7; A0A146RH13; B1PF34; H3DB42; A0A146RQV8; A0A060YBV0; G3PQ58; A0A146W7Q2; H3BX59; A0A0F8BDK2; A0A146W4J3; G9M5T1; G3PQ45; A0A087XQZ5; A0A146Y740; Q90337; Q91520; A0A146Y8S1; C4TIP1; A0A146Y712; A0A146U9E3;…	672.012	2014.02	1.22244	0.000820672	67.7467	59.4684
High	KQADSVAELGEQIDNLQR	B1Q382; G9M5T1; A0A087XQZ5; B3DJM6; W5L2L4; H2UN88; Q8JIP5; C0STL2; P87344; Q05K06; B1Q385; A0A060Y971; Q98TQ5; A0A0F8CGF3; H3DR28	W5KA98; A0A146QK60; A8R0Q2; Q05K05; H2LNV3; G3N9L7; B1Q382; Q789E7; G3N9L2; F1R6C7; H3CNF0; H3CMX1; C4TIP2; A0A147A0M4; Q05K11; A0A087YKG8; C4TIP3; A0A0S7LIY8; A0A146Q5H9; Q2PMW9; A8R0Q7; Q4RXH7; A0A146RH13; B1PF34; H3DB42; A0A146RQV8; A0A060YBV0; G3PQ58; A0A146W7Q2; H3BX59; A0A0F8BDK2; A0A146W4J3; G9M5T1; G3PQ45; A0A087XQZ5; A0A146Y740; Q90337; Q91520; A0A146Y8S1; C4TIP1; A0A146Y712; A0A146U9E3;…	672.011	2014.02	-0.504955	-0.000338996	71.3541	59.5732
High	MEGDxNEMEIQLSHANR		C9W8L8	662.972	1986.9	0.0337478	2.23511e-05	75.9972	61.0612
High	KLESDLVQVQGEVDDSVQEAR	P87344	P87344; Q8JIV4	782.06	2344.17	1.02395	0.000800105	88.8418	61.3267
High	KLESDLVQVQGEVDDSVQEAR	P87344	P87344; Q8JIV4	782.059	2344.16	0.0866191	6.76831e-05	74.7062	61.3753
High	KLESDLVQVQGEVDDSVQEAR	P87344	P87344; Q8JIV4	782.06	2344.16	0.555287	0.000433894	33.9826	61.4188
High	KLESDLVQVQGEVDDSVQEAR	P87344	P87344; Q8JIV4	782.059	2344.16	-0.694493	-0.000542668	58.842	61.4615
High	VGSNENIFVESQDHAGGPLNVK	A0A060ZDQ0	A0A060ZDQ0	771.049	2311.13	0.346558	0.00026698	100	61.472
High	VGSNENIFVESQDHAGGPLNVK	A0A060ZDQ0	A0A060ZDQ0	771.05	2311.14	1.6142	0.00124354	100	61.5172
High	ALQESHQQTLDDLQAEEDKVNTLTK	T2HFG0; H2UN88; C0STL2; P87344; Q98TQ5	H3CNF0; T2HFG0; Q4ST82; H2UN88; O93498; C0STL2; Q4SSC8; A0A0F8CAS0; P87344; H3CNI2; Q98TQ6; Q98TQ5; H9LBJ5	714.358	2854.41	0.908631	0.000648401	49.451	61.563
High	VGSNENIFVESQDHAGGPLNVK	A0A060ZDQ0	A0A060ZDQ0	771.047	2311.13	-1.55491	-0.00119786	94.4901	61.5683
High	MLGQNPTREELDEIIEEVDEDGSGTIDFEEFLVMMVR	A0A060WZV7	F5BZS8; B9EP57; H2SBN2; B9VJM4; H2L8Q7; A0A146V9Q1; A0A146P9L9; I3IZI3; H2L8Q9; A0A060WZV7; Q4RB38; A0A060YT85; H2L8R0; A0A146ZN37; G3NJM6	1429.34	4286.01	5.32284	0.00760453	100	164.984
High	VGSNENIFVESQDHAGGPLNVK	A0A060ZDQ0	A0A060ZDQ0	771.05	2311.14	1.85188	0.00142665	64.7527	61.6296
High	QADSVAELGEQIDNLQR	B1Q382; G9M5T1; A0A087XQZ5; B3DJM6; W5L2L4; H2UN88; Q8JIP5; C0STL2; P87344; Q05K06; B1Q385; A0A060Y971; Q98TQ5; A0A0F8CGF3; H3DR28	W5KA98; A0A146QK60; A8R0Q2; Q05K05; H2LNV3; G3N9L7; B1Q382; Q789E7; G3N9L2; F1R6C7; H3CNF0; H3CMX1; C4TIP2; A0A147A0M4; Q05K11; A0A087YKG8; C4TIP3; A0A0S7LIY8; A0A146Q5H9; Q2PMW9; A8R0Q7; Q4RXH7; A0A146RH13; B1PF34; H3DB42; A0A146RQV8; A0A060YBV0; G3PQ58; A0A146W7Q2; H3BX59; A0A0F8BDK2; A0A146W4J3; G9M5T1; G3PQ45; A0A087XQZ5; A0A146Y740; Q90337; Q91520; A0A146Y8S1; C4TIP1; A0A146Y712; A0A146U9E3;…	943.467	1885.93	1.14667	0.00108127	91.1566	62.7286
High	QADSVAELGEQIDNLQR	B1Q382; G9M5T1; A0A087XQZ5; B3DJM6; W5L2L4; H2UN88; Q8JIP5; C0STL2; P87344; Q05K06; B1Q385; A0A060Y971; Q98TQ5; A0A0F8CGF3; H3DR28	W5KA98; A0A146QK60; A8R0Q2; Q05K05; H2LNV3; G3N9L7; B1Q382; Q789E7; G3N9L2; F1R6C7; H3CNF0; H3CMX1; C4TIP2; A0A147A0M4; Q05K11; A0A087YKG8; C4TIP3; A0A0S7LIY8; A0A146Q5H9; Q2PMW9; A8R0Q7; Q4RXH7; A0A146RH13; B1PF34; H3DB42; A0A146RQV8; A0A060YBV0; G3PQ58; A0A146W7Q2; H3BX59; A0A0F8BDK2; A0A146W4J3; G9M5T1; G3PQ45; A0A087XQZ5; A0A146Y740; Q90337; Q91520; A0A146Y8S1; C4TIP1; A0A146Y712; A0A146U9E3;…	629.314	1885.93	1.04245	0.00065533	48.049	62.7799
High	LESDLVQVQGEVDDSVQEAR	P87344	P87344; Q8JIV4	1108.54	2216.07	1.41622	0.00156922	100	62.8034
High	QADSVAELGEQIDNLQR	B1Q382; G9M5T1; A0A087XQZ5; B3DJM6; W5L2L4; H2UN88; Q8JIP5; C0STL2; P87344; Q05K06; B1Q385; A0A060Y971; Q98TQ5; A0A0F8CGF3; H3DR28	W5KA98; A0A146QK60; A8R0Q2; Q05K05; H2LNV3; G3N9L7; B1Q382; Q789E7; G3N9L2; F1R6C7; H3CNF0; H3CMX1; C4TIP2; A0A147A0M4; Q05K11; A0A087YKG8; C4TIP3; A0A0S7LIY8; A0A146Q5H9; Q2PMW9; A8R0Q7; Q4RXH7; A0A146RH13; B1PF34; H3DB42; A0A146RQV8; A0A060YBV0; G3PQ58; A0A146W7Q2; H3BX59; A0A0F8BDK2; A0A146W4J3; G9M5T1; G3PQ45; A0A087XQZ5; A0A146Y740; Q90337; Q91520; A0A146Y8S1; C4TIP1; A0A146Y712; A0A146U9E3;…	943.466	1885.92	-0.600955	-0.000566678	95.108	62.8318
High	MEGDLNEMEIQLSHANR	B1Q382; G9M5T1; A0A087XQZ5; B3DJM6; W5L2L4; H2UN88; C0STL2; P87344; Q05K06; B1Q385; D6PVQ0; Q98TQ5; A0A0F8CGF3; H3DR28; Q33BP2	A0A146QK60; A8R0Q2; Q05K05; H2LNV3; B1Q382; G3N9L2; F1R6C7; H3CMX1; Q90YF6; C4TIP2; A0A147A0M4; Q05K11; A0A087YKG8; H3CE06; C4TIP3; A0A146SNL8; A0A146Q5H9; A0A0F8C274; M3ZPQ1; A8R0Q7; Q4RXH7; A0A146RH13; Q4T6M5; B1PF34; H3DB42; A0A146RQV8; A0A060YBV0; H3CNI4; H3BX59; A0A0S7JAN2; G9M5T1; A0A087XQZ5; A0A0S7K7R5; A0A146Y740; Q91520; A0A146Y8S1; C4TIP1; W5ZLZ4; A0A146Y712; A0A146U9E3; Q98TQ4; A0A146U…	662.972	1986.9	0.0337478	2.23511e-05	75.9972	61.0612
High	MEGDxNEMEIQLSHANR		C9W8L8	662.972	1986.9	0.0337478	2.23511e-05	47.6823	61.0157
High	MEGDLNEMEIQLSHANR	B1Q382; G9M5T1; A0A087XQZ5; B3DJM6; W5L2L4; H2UN88; C0STL2; P87344; Q05K06; B1Q385; D6PVQ0; Q98TQ5; A0A0F8CGF3; H3DR28; Q33BP2	A0A146QK60; A8R0Q2; Q05K05; H2LNV3; B1Q382; G3N9L2; F1R6C7; H3CMX1; Q90YF6; C4TIP2; A0A147A0M4; Q05K11; A0A087YKG8; H3CE06; C4TIP3; A0A146SNL8; A0A146Q5H9; A0A0F8C274; M3ZPQ1; A8R0Q7; Q4RXH7; A0A146RH13; Q4T6M5; B1PF34; H3DB42; A0A146RQV8; A0A060YBV0; H3CNI4; H3BX59; A0A0S7JAN2; G9M5T1; A0A087XQZ5; A0A0S7K7R5; A0A146Y740; Q91520; A0A146Y8S1; C4TIP1; W5ZLZ4; A0A146Y712; A0A146U9E3; Q98TQ4; A0A146U…	662.972	1986.9	0.0337478	2.23511e-05	47.6823	61.0157
High	MEGDxNEMEIQLSHANR		C9W8L8	662.971	1986.9	-1.44075	-0.000954211	50.6306	60.9783
High	KQADTVADLGEQIDNLQR	A0A146UU13	A0A146TVH6; A0A146UU32; A0A146UV76; A0A147B5U4; A0A146UU29; A0A146UU23; A0A146UU19; A0A146UUA7; A0A146UVS4; A0A146PH08; A0A146QKG2; A0A146UUJ4; A0A146UV67; A0A146UUQ0; A0A146UU07; M4AVP5; A0A146XFX6; A0A146UUK4; A0A146UUB5; A0A146UU16; A0A146XLQ6; A0A146UU13; A0A146UU98; A0A146UVT3; A0A146ZHV0; A0A146UUA4	672.011	2014.02	-0.504955	-0.000338996	71.3541	59.5732
High	MEIDDLSSNMEAVSK	B1Q382; P87344; B1Q385	B1Q382; O93498; B1Q383; P87344; B1Q385; B1Q384	834.876	1668.75	0.083798	6.99188e-05	100	60.171
High	AITDAAMMAEELK	B1Q382; G9M5T1; A0A087XQZ5; T2HFG0; B3DJM6; A0A060VYS1; Q8JIP5; P87344; B1Q385; D6PVQ0; A0A060Y971; Q98TQ5; A0A146UU13; H3DR28	M4AVL6; A0A0S7KB19; W5KA98; H3CMS0; M4A5A5; H3CDY9; A0A0N8JYG6; A8R0Q2; Q05K05; H2LNV3; B1Q382; Q789E7; G3N9L2; F1R6C7; F4ZQR5; H3CMX1; Q90YF6; C4TIP2; Q05K11; A0A087YKG8; C4TIP3; A0A146Q5H9; Q2PMW9; M3ZPQ1; Q4RXH7; H3DB42; I3KU01; A0A060YPQ8; A0A060YBV0; A0A060YS70; G3PQ58; H3BW93; H3CNI4; H3BX59; A0A060WL78; A0A0S7JAN2; G9M5T1; M3ZVQ6; G3PQ45; Q91208; A0A060Y5W1; A0A087XQZ5; Q90337; Q91520; C4T…	697.338	1393.67	-0.927622	-0.0006464	100	60.1767
High	AITDAAMMAEELK	B1Q382; G9M5T1; A0A087XQZ5; T2HFG0; B3DJM6; A0A060VYS1; Q8JIP5; P87344; B1Q385; D6PVQ0; A0A060Y971; Q98TQ5; A0A146UU13; H3DR28	M4AVL6; A0A0S7KB19; W5KA98; H3CMS0; M4A5A5; H3CDY9; A0A0N8JYG6; A8R0Q2; Q05K05; H2LNV3; B1Q382; Q789E7; G3N9L2; F1R6C7; F4ZQR5; H3CMX1; Q90YF6; C4TIP2; Q05K11; A0A087YKG8; C4TIP3; A0A146Q5H9; Q2PMW9; M3ZPQ1; Q4RXH7; H3DB42; I3KU01; A0A060YPQ8; A0A060YBV0; A0A060YS70; G3PQ58; H3BW93; H3CNI4; H3BX59; A0A060WL78; A0A0S7JAN2; G9M5T1; M3ZVQ6; G3PQ45; Q91208; A0A060Y5W1; A0A087XQZ5; Q90337; Q91520; C4T…	697.339	1393.67	0.123447	8.60223e-05	85.7723	60.2043
High	MEIDDLSSNMEAVSK	B1Q382; P87344; B1Q385	B1Q382; O93498; B1Q383; P87344; B1Q385; B1Q384	834.876	1668.75	-0.0625039	-5.21516e-05	100	60.2097
High	AITDAAMMAEELK	B1Q382; G9M5T1; A0A087XQZ5; T2HFG0; B3DJM6; A0A060VYS1; Q8JIP5; P87344; B1Q385; D6PVQ0; A0A060Y971; Q98TQ5; A0A146UU13; H3DR28	M4AVL6; A0A0S7KB19; W5KA98; H3CMS0; M4A5A5; H3CDY9; A0A0N8JYG6; A8R0Q2; Q05K05; H2LNV3; B1Q382; Q789E7; G3N9L2; F1R6C7; F4ZQR5; H3CMX1; Q90YF6; C4TIP2; Q05K11; A0A087YKG8; C4TIP3; A0A146Q5H9; Q2PMW9; M3ZPQ1; Q4RXH7; H3DB42; I3KU01; A0A060YPQ8; A0A060YBV0; A0A060YS70; G3PQ58; H3BW93; H3CNI4; H3BX59; A0A060WL78; A0A0S7JAN2; G9M5T1; M3ZVQ6; G3PQ45; Q91208; A0A060Y5W1; A0A087XQZ5; Q90337; Q91520; C4T…	697.339	1393.67	0.473804	0.000330163	97.374	60.2559
High	MEIDDLSSNMEAVSK	B1Q382; P87344; B1Q385	B1Q382; O93498; B1Q383; P87344; B1Q385; B1Q384	834.877	1668.75	0.522704	0.00043613	100	60.2614
High	KQADSVAELGEQIDNLQR	B1Q382; G9M5T1; A0A087XQZ5; B3DJM6; W5L2L4; H2UN88; Q8JIP5; C0STL2; P87344; Q05K06; B1Q385; A0A060Y971; Q98TQ5; A0A0F8CGF3; H3DR28	W5KA98; A0A146QK60; A8R0Q2; Q05K05; H2LNV3; G3N9L7; B1Q382; Q789E7; G3N9L2; F1R6C7; H3CNF0; H3CMX1; C4TIP2; A0A147A0M4; Q05K11; A0A087YKG8; C4TIP3; A0A0S7LIY8; A0A146Q5H9; Q2PMW9; A8R0Q7; Q4RXH7; A0A146RH13; B1PF34; H3DB42; A0A146RQV8; A0A060YBV0; G3PQ58; A0A146W7Q2; H3BX59; A0A0F8BDK2; A0A146W4J3; G9M5T1; G3PQ45; A0A087XQZ5; A0A146Y740; Q90337; Q91520; A0A146Y8S1; C4TIP1; A0A146Y712; A0A146U9E3;…	672.011	2014.02	-1.32319	-0.000888313	100	59.5202
High	AITDAAMMAEELK	B1Q382; G9M5T1; A0A087XQZ5; T2HFG0; B3DJM6; A0A060VYS1; Q8JIP5; P87344; B1Q385; D6PVQ0; A0A060Y971; Q98TQ5; A0A146UU13; H3DR28	M4AVL6; A0A0S7KB19; W5KA98; H3CMS0; M4A5A5; H3CDY9; A0A0N8JYG6; A8R0Q2; Q05K05; H2LNV3; B1Q382; Q789E7; G3N9L2; F1R6C7; F4ZQR5; H3CMX1; Q90YF6; C4TIP2; Q05K11; A0A087YKG8; C4TIP3; A0A146Q5H9; Q2PMW9; M3ZPQ1; Q4RXH7; H3DB42; I3KU01; A0A060YPQ8; A0A060YBV0; A0A060YS70; G3PQ58; H3BW93; H3CNI4; H3BX59; A0A060WL78; A0A0S7JAN2; G9M5T1; M3ZVQ6; G3PQ45; Q91208; A0A060Y5W1; A0A087XQZ5; Q90337; Q91520; C4T…	697.339	1393.67	0.648982	0.000452233	77.789	60.3071
High	TIDDLEDELYAQK	D6PVP3; Q8AV86; Q8JIM7; Q5SPK6; H2SQV9; A0A087YEU9; A0A087YF71; P13104; A0A0F8CF82	K4PEK4; A0A060WJN0; D6PVP3; H2SQW0; A0A060WLJ6; H3DQ99; G1FCF2; Q6P0W3; Q8AV86; Q5SPK5; W5K5N7; Q8JIM7; H2M5M4; X2J4M2; I3J2Q1; A0A0P7TWT7; W5KS79; A0A147AVZ3; Q4RB49; A0A146NCI0; Q5SPK6; A0A060WRJ2; Q4SAI3; A0A0S7FXE9; Q91490; I3JVV2; W5JYT8; H2SQV9; A0A087YEU9; A0A087YF71; A0A146WFT2; A0A146YH85; A0A060W8G0; P13104; Q91472; Q805C6; Q76CT4; Q9DEB7; G3PVL1; B9V2W9; A0A060X9W2; A0A0F8CF82; F2WR17;…	776.872	1552.74	-0.54419	-0.000422492	8.03585	60.4586
High	TIDDLEDELYAQK	D6PVP3; Q8AV86; Q8JIM7; Q5SPK6; H2SQV9; A0A087YEU9; A0A087YF71; P13104; A0A0F8CF82	K4PEK4; A0A060WJN0; D6PVP3; H2SQW0; A0A060WLJ6; H3DQ99; G1FCF2; Q6P0W3; Q8AV86; Q5SPK5; W5K5N7; Q8JIM7; H2M5M4; X2J4M2; I3J2Q1; A0A0P7TWT7; W5KS79; A0A147AVZ3; Q4RB49; A0A146NCI0; Q5SPK6; A0A060WRJ2; Q4SAI3; A0A0S7FXE9; Q91490; I3JVV2; W5JYT8; H2SQV9; A0A087YEU9; A0A087YF71; A0A146WFT2; A0A146YH85; A0A060W8G0; P13104; Q91472; Q805C6; Q76CT4; Q9DEB7; G3PVL1; B9V2W9; A0A060X9W2; A0A0F8CF82; F2WR17;…	776.873	1552.74	0.241971	0.000187859	9.78454	60.5069
High	TIDDLEDELYAQK	D6PVP3; Q8AV86; Q8JIM7; Q5SPK6; H2SQV9; A0A087YEU9; A0A087YF71; P13104; A0A0F8CF82	K4PEK4; A0A060WJN0; D6PVP3; H2SQW0; A0A060WLJ6; H3DQ99; G1FCF2; Q6P0W3; Q8AV86; Q5SPK5; W5K5N7; Q8JIM7; H2M5M4; X2J4M2; I3J2Q1; A0A0P7TWT7; W5KS79; A0A147AVZ3; Q4RB49; A0A146NCI0; Q5SPK6; A0A060WRJ2; Q4SAI3; A0A0S7FXE9; Q91490; I3JVV2; W5JYT8; H2SQV9; A0A087YEU9; A0A087YF71; A0A146WFT2; A0A146YH85; A0A060W8G0; P13104; Q91472; Q805C6; Q76CT4; Q9DEB7; G3PVL1; B9V2W9; A0A060X9W2; A0A0F8CF82; F2WR17;…	776.872	1552.74	-0.15111	-0.000117317	10.654	60.5556
High	TIDDLEDELYAQK	D6PVP3; Q8AV86; Q8JIM7; Q5SPK6; H2SQV9; A0A087YEU9; A0A087YF71; P13104; A0A0F8CF82	K4PEK4; A0A060WJN0; D6PVP3; H2SQW0; A0A060WLJ6; H3DQ99; G1FCF2; Q6P0W3; Q8AV86; Q5SPK5; W5K5N7; Q8JIM7; H2M5M4; X2J4M2; I3J2Q1; A0A0P7TWT7; W5KS79; A0A147AVZ3; Q4RB49; A0A146NCI0; Q5SPK6; A0A060WRJ2; Q4SAI3; A0A0S7FXE9; Q91490; I3JVV2; W5JYT8; H2SQV9; A0A087YEU9; A0A087YF71; A0A146WFT2; A0A146YH85; A0A060W8G0; P13104; Q91472; Q805C6; Q76CT4; Q9DEB7; G3PVL1; B9V2W9; A0A060X9W2; A0A0F8CF82; F2WR17;…	776.872	1552.74	-0.229726	-0.000178352	12.9141	60.6051
High	MEGDLNEMEIQLSHANR	B1Q382; G9M5T1; A0A087XQZ5; B3DJM6; W5L2L4; H2UN88; C0STL2; P87344; Q05K06; B1Q385; D6PVQ0; Q98TQ5; A0A0F8CGF3; H3DR28; Q33BP2	A0A146QK60; A8R0Q2; Q05K05; H2LNV3; B1Q382; G3N9L2; F1R6C7; H3CMX1; Q90YF6; C4TIP2; A0A147A0M4; Q05K11; A0A087YKG8; H3CE06; C4TIP3; A0A146SNL8; A0A146Q5H9; A0A0F8C274; M3ZPQ1; A8R0Q7; Q4RXH7; A0A146RH13; Q4T6M5; B1PF34; H3DB42; A0A146RQV8; A0A060YBV0; H3CNI4; H3BX59; A0A0S7JAN2; G9M5T1; A0A087XQZ5; A0A0S7K7R5; A0A146Y740; Q91520; A0A146Y8S1; C4TIP1; W5ZLZ4; A0A146Y712; A0A146U9E3; Q98TQ4; A0A146U…	662.971	1986.9	-1.25644	-0.000832141	62.8687	60.9281
High	MEGDxNEMEIQLSHANR		C9W8L8	662.971	1986.9	-1.25644	-0.000832141	62.8687	60.9281
High	MEGDLNEMEIQLSHANR	B1Q382; G9M5T1; A0A087XQZ5; B3DJM6; W5L2L4; H2UN88; C0STL2; P87344; Q05K06; B1Q385; D6PVQ0; Q98TQ5; A0A0F8CGF3; H3DR28; Q33BP2	A0A146QK60; A8R0Q2; Q05K05; H2LNV3; B1Q382; G3N9L2; F1R6C7; H3CMX1; Q90YF6; C4TIP2; A0A147A0M4; Q05K11; A0A087YKG8; H3CE06; C4TIP3; A0A146SNL8; A0A146Q5H9; A0A0F8C274; M3ZPQ1; A8R0Q7; Q4RXH7; A0A146RH13; Q4T6M5; B1PF34; H3DB42; A0A146RQV8; A0A060YBV0; H3CNI4; H3BX59; A0A0S7JAN2; G9M5T1; A0A087XQZ5; A0A0S7K7R5; A0A146Y740; Q91520; A0A146Y8S1; C4TIP1; W5ZLZ4; A0A146Y712; A0A146U9E3; Q98TQ4; A0A146U…	662.971	1986.9	-1.44075	-0.000954211	50.6306	60.9783
High	MEIDDLSSNMEAVSK	B1Q382; P87344; B1Q385	B1Q382; O93498; B1Q383; P87344; B1Q385; B1Q384	834.877	1668.75	0.742156	0.000619235	75.9269	60.3124
High	AGDSDGDGAIGVEEWAVLVK	A5I873	A5I873	994.485	1987.96	1.17429	0.00116722	17.7208	74.6557
High	AGDSDGDGAIGVEEWVALVK	P02621	P02621	994.485	1987.96	1.17429	0.00116722	17.7208	74.6557
High	AAAGDSGSSNVFSMFEQSQIQEYK	F8U029	F8U029	861.055	2581.15	0.0846191	7.28049e-05	43.6882	75.0204
High	EELDEIIEEVDEDGSGTIDFEEFLVMMVR	A0A060WZV7	F5BZS8; B9EP57; H2SBN2; B9VJM4; H2L8Q7; A0A146V9Q1; A0A146P9L9; I3IZI3; H2L8Q9; A0A060WZV7; Q4RB38; A0A060YT85; H2L8R0; A0A146ZN37; G3NJM6	1130.18	3388.52	-2.64161	-0.00298372	100	132.494
High	EELDEIIEEVDEDGSGTIDFEEFLVMMVR	A0A060WZV7	F5BZS8; B9EP57; H2SBN2; B9VJM4; H2L8Q7; A0A146V9Q1; A0A146P9L9; I3IZI3; H2L8Q9; A0A060WZV7; Q4RB38; A0A060YT85; H2L8R0; A0A146ZN37; G3NJM6	1130.18	3388.52	-4.15464	-0.00469271	100	133.188
High	EELDEIIEEVDEDGSGTIDFEEFLVMMVR	A0A060WZV7	F5BZS8; B9EP57; H2SBN2; B9VJM4; H2L8Q7; A0A146V9Q1; A0A146P9L9; I3IZI3; H2L8Q9; A0A060WZV7; Q4RB38; A0A060YT85; H2L8R0; A0A146ZN37; G3NJM6	1130.18	3388.52	-4.47886	-0.00505892	100	133.22
High	EELDEIIEEVDEDGSGTIDFEEFLVMMVR	A0A060WZV7	F5BZS8; B9EP57; H2SBN2; B9VJM4; H2L8Q7; A0A146V9Q1; A0A146P9L9; I3IZI3; H2L8Q9; A0A060WZV7; Q4RB38; A0A060YT85; H2L8R0; A0A146ZN37; G3NJM6	1130.18	3388.54	0.492528	0.000556316	100	133.253
High	MLGQNPTREELDEIIEEVDEDGSGTIDFEEFLVMMVR	A0A060WZV7	F5BZS8; B9EP57; H2SBN2; B9VJM4; H2L8Q7; A0A146V9Q1; A0A146P9L9; I3IZI3; H2L8Q9; A0A060WZV7; Q4RB38; A0A060YT85; H2L8R0; A0A146ZN37; G3NJM6	1072.25	4285.98	-1.47308	-0.0015784	100	133.499
High	MLGQNPTREELDEIIEEVDEDGSGTIDFEEFLVMMVR	A0A060WZV7	F5BZS8; B9EP57; H2SBN2; B9VJM4; H2L8Q7; A0A146V9Q1; A0A146P9L9; I3IZI3; H2L8Q9; A0A060WZV7; Q4RB38; A0A060YT85; H2L8R0; A0A146ZN37; G3NJM6	1072.25	4286	3.53962	0.00379269	100	133.544
High	MLGQNPTREELDEIIEEVDEDGSGTIDFEEFLVMMVR	A0A060WZV7	F5BZS8; B9EP57; H2SBN2; B9VJM4; H2L8Q7; A0A146V9Q1; A0A146P9L9; I3IZI3; H2L8Q9; A0A060WZV7; Q4RB38; A0A060YT85; H2L8R0; A0A146ZN37; G3NJM6	1072.25	4285.97	-1.81486	-0.00194461	96.5979	133.583
High	MLGQNPTREELDEIIEEVDEDGSGTIDFEEFLVMMVR	A0A060WZV7	F5BZS8; B9EP57; H2SBN2; B9VJM4; H2L8Q7; A0A146V9Q1; A0A146P9L9; I3IZI3; H2L8Q9; A0A060WZV7; Q4RB38; A0A060YT85; H2L8R0; A0A146ZN37; G3NJM6	1429.33	4285.98	-1.42723	-0.00203902	69.7304	133.611
High	EELDEIIEEVDEDGSGTIDFEEFLVMMVR	A0A060WZV7	F5BZS8; B9EP57; H2SBN2; B9VJM4; H2L8Q7; A0A146V9Q1; A0A146P9L9; I3IZI3; H2L8Q9; A0A060WZV7; Q4RB38; A0A060YT85; H2L8R0; A0A146ZN37; G3NJM6	1130.18	3388.53	-0.804355	-0.000908528	100	136.303
High	EELDEIIEEVDEDGSGTIDFEEFLVMMVR	A0A060WZV7	F5BZS8; B9EP57; H2SBN2; B9VJM4; H2L8Q7; A0A146V9Q1; A0A146P9L9; I3IZI3; H2L8Q9; A0A060WZV7; Q4RB38; A0A060YT85; H2L8R0; A0A146ZN37; G3NJM6	1130.18	3388.53	-1.0205	-0.00115267	100	136.348
High	EELDEIIEEVDEDGSGTIDFEEFLVMMVR	A0A060WZV7	F5BZS8; B9EP57; H2SBN2; B9VJM4; H2L8Q7; A0A146V9Q1; A0A146P9L9; I3IZI3; H2L8Q9; A0A060WZV7; Q4RB38; A0A060YT85; H2L8R0; A0A146ZN37; G3NJM6	1130.18	3388.54	0.708675	0.000800456	100	136.414
High	MLGQNPTREELDEIIEEVDEDGSGTIDFEEFLVMMVR	A0A060WZV7	F5BZS8; B9EP57; H2SBN2; B9VJM4; H2L8Q7; A0A146V9Q1; A0A146P9L9; I3IZI3; H2L8Q9; A0A060WZV7; Q4RB38; A0A060YT85; H2L8R0; A0A146ZN37; G3NJM6	1072.26	4286	4.56495	0.00489132	100	136.63
High	MLGQNPTREELDEIIEEVDEDGSGTIDFEEFLVMMVR	A0A060WZV7	F5BZS8; B9EP57; H2SBN2; B9VJM4; H2L8Q7; A0A146V9Q1; A0A146P9L9; I3IZI3; H2L8Q9; A0A060WZV7; Q4RB38; A0A060YT85; H2L8R0; A0A146ZN37; G3NJM6	1429.33	4285.98	-0.401899	-0.000574177	100	136.674
High	MLGQNPTREELDEIIEEVDEDGSGTIDFEEFLVMMVR	A0A060WZV7	F5BZS8; B9EP57; H2SBN2; B9VJM4; H2L8Q7; A0A146V9Q1; A0A146P9L9; I3IZI3; H2L8Q9; A0A060WZV7; Q4RB38; A0A060YT85; H2L8R0; A0A146ZN37; G3NJM6	1072.25	4285.99	1.03327	0.00110714	100	136.763
High	EELDEIIEEVDEDGSGTIDFEEFLVMMVR	A0A060WZV7	F5BZS8; B9EP57; H2SBN2; B9VJM4; H2L8Q7; A0A146V9Q1; A0A146P9L9; I3IZI3; H2L8Q9; A0A060WZV7; Q4RB38; A0A060YT85; H2L8R0; A0A146ZN37; G3NJM6	1130.18	3388.54	1.46519	0.00165495	100	139.435
High	MLGQNPTREELDEIIEEVDEDGSGTIDFEEFLVMMVR	A0A060WZV7	F5BZS8; B9EP57; H2SBN2; B9VJM4; H2L8Q7; A0A146V9Q1; A0A146P9L9; I3IZI3; H2L8Q9; A0A060WZV7; Q4RB38; A0A060YT85; H2L8R0; A0A146ZN37; G3NJM6	1429.33	4285.98	-0.658231	-0.000940388	54.1127	130.486
High	MLGQNPTREELDEIIEEVDEDGSGTIDFEEFLVMMVR	A0A060WZV7	F5BZS8; B9EP57; H2SBN2; B9VJM4; H2L8Q7; A0A146V9Q1; A0A146P9L9; I3IZI3; H2L8Q9; A0A060WZV7; Q4RB38; A0A060YT85; H2L8R0; A0A146ZN37; G3NJM6	1429.33	4285.99	1.22153	0.00174516	78.243	130.443
High	MLGQNPTREELDEIIEEVDEDGSGTIDFEEFLVMMVR	A0A060WZV7	F5BZS8; B9EP57; H2SBN2; B9VJM4; H2L8Q7; A0A146V9Q1; A0A146P9L9; I3IZI3; H2L8Q9; A0A060WZV7; Q4RB38; A0A060YT85; H2L8R0; A0A146ZN37; G3NJM6	1429.33	4285.99	1.39242	0.0019893	58.6838	130.416
High	MLGQNPTREELDEIIEEVDEDGSGTIDFEEFLVMMVR	A0A060WZV7	F5BZS8; B9EP57; H2SBN2; B9VJM4; H2L8Q7; A0A146V9Q1; A0A146P9L9; I3IZI3; H2L8Q9; A0A060WZV7; Q4RB38; A0A060YT85; H2L8R0; A0A146ZN37; G3NJM6	1429.34	4285.99	2.07597	0.00296586	79.7788	130.378
High	MLGQNPTREELDEIIEEVDEDGSGTIDFEEFLVMMVR	A0A060WZV7	F5BZS8; B9EP57; H2SBN2; B9VJM4; H2L8Q7; A0A146V9Q1; A0A146P9L9; I3IZI3; H2L8Q9; A0A060WZV7; Q4RB38; A0A060YT85; H2L8R0; A0A146ZN37; G3NJM6	1429.33	4285.99	0.708871	0.00101274	36.5625	117.898
High	MLGQNPTREELDEIIEEVDEDGSGTIDFEEFLVMMVR	A0A060WZV7	F5BZS8; B9EP57; H2SBN2; B9VJM4; H2L8Q7; A0A146V9Q1; A0A146P9L9; I3IZI3; H2L8Q9; A0A060WZV7; Q4RB38; A0A060YT85; H2L8R0; A0A146ZN37; G3NJM6	1429.33	4285.97	-1.93989	-0.00277144	30.3032	117.94
High	MLGQNPTREELDEIIEEVDEDGSGTIDFEEFLVMMVR	A0A060WZV7	F5BZS8; B9EP57; H2SBN2; B9VJM4; H2L8Q7; A0A146V9Q1; A0A146P9L9; I3IZI3; H2L8Q9; A0A060WZV7; Q4RB38; A0A060YT85; H2L8R0; A0A146ZN37; G3NJM6	1429.33	4285.99	1.47787	0.00211137	41.3426	117.966
High	MLGQNPTREELDEIIEEVDEDGSGTIDFEEFLVMMVR	A0A060WZV7	F5BZS8; B9EP57; H2SBN2; B9VJM4; H2L8Q7; A0A146V9Q1; A0A146P9L9; I3IZI3; H2L8Q9; A0A060WZV7; Q4RB38; A0A060YT85; H2L8R0; A0A146ZN37; G3NJM6	1429.33	4285.99	1.47787	0.00211137	43.6689	120.976
High	MLGQNPTREELDEIIEEVDEDGSGTIDFEEFLVMMVR	A0A060WZV7	F5BZS8; B9EP57; H2SBN2; B9VJM4; H2L8Q7; A0A146V9Q1; A0A146P9L9; I3IZI3; H2L8Q9; A0A060WZV7; Q4RB38; A0A060YT85; H2L8R0; A0A146ZN37; G3NJM6	1072.25	4285.98	0.235793	0.000252651	48.6668	121.008
High	MLGQNPTREELDEIIEEVDEDGSGTIDFEEFLVMMVR	A0A060WZV7	F5BZS8; B9EP57; H2SBN2; B9VJM4; H2L8Q7; A0A146V9Q1; A0A146P9L9; I3IZI3; H2L8Q9; A0A060WZV7; Q4RB38; A0A060YT85; H2L8R0; A0A146ZN37; G3NJM6	1429.34	4285.99	1.90509	0.00272172	61.5326	121.041
High	MLGQNPTREELDEIIEEVDEDGSGTIDFEEFLVMMVR	A0A060WZV7	F5BZS8; B9EP57; H2SBN2; B9VJM4; H2L8Q7; A0A146V9Q1; A0A146P9L9; I3IZI3; H2L8Q9; A0A060WZV7; Q4RB38; A0A060YT85; H2L8R0; A0A146ZN37; G3NJM6	1429.33	4285.98	0.281652	0.000402385	42.9102	121.073
High	EELDEIIEEVDEDGSGTIDFEEFLVMMVR	A0A060WZV7	F5BZS8; B9EP57; H2SBN2; B9VJM4; H2L8Q7; A0A146V9Q1; A0A146P9L9; I3IZI3; H2L8Q9; A0A060WZV7; Q4RB38; A0A060YT85; H2L8R0; A0A146ZN37; G3NJM6	1130.18	3388.54	1.57326	0.00177702	100	139.474
High	MLGQNPTREELDEIIEEVDEDGSGTIDFEEFLVMMVR	A0A060WZV7	F5BZS8; B9EP57; H2SBN2; B9VJM4; H2L8Q7; A0A146V9Q1; A0A146P9L9; I3IZI3; H2L8Q9; A0A060WZV7; Q4RB38; A0A060YT85; H2L8R0; A0A146ZN37; G3NJM6	1429.33	4285.99	1.81964	0.00259965	47.4517	124.085
High	MLGQNPTREELDEIIEEVDEDGSGTIDFEEFLVMMVR	A0A060WZV7	F5BZS8; B9EP57; H2SBN2; B9VJM4; H2L8Q7; A0A146V9Q1; A0A146P9L9; I3IZI3; H2L8Q9; A0A060WZV7; Q4RB38; A0A060YT85; H2L8R0; A0A146ZN37; G3NJM6	1429.33	4285.98	0.0253204	3.61743e-05	39.4151	124.188
High	MLGQNPTREELDEIIEEVDEDGSGTIDFEEFLVMMVR	A0A060WZV7	F5BZS8; B9EP57; H2SBN2; B9VJM4; H2L8Q7; A0A146V9Q1; A0A146P9L9; I3IZI3; H2L8Q9; A0A060WZV7; Q4RB38; A0A060YT85; H2L8R0; A0A146ZN37; G3NJM6	1429.33	4285.98	0.196208	0.000280315	39.1631	124.214
High	MLGQNPTREELDEIIEEVDEDGSGTIDFEEFLVMMVR	A0A060WZV7	F5BZS8; B9EP57; H2SBN2; B9VJM4; H2L8Q7; A0A146V9Q1; A0A146P9L9; I3IZI3; H2L8Q9; A0A060WZV7; Q4RB38; A0A060YT85; H2L8R0; A0A146ZN37; G3NJM6	1429.33	4285.98	0.537984	0.000768596	55.8988	127.23
High	MLGQNPTREELDEIIEEVDEDGSGTIDFEEFLVMMVR	A0A060WZV7	F5BZS8; B9EP57; H2SBN2; B9VJM4; H2L8Q7; A0A146V9Q1; A0A146P9L9; I3IZI3; H2L8Q9; A0A060WZV7; Q4RB38; A0A060YT85; H2L8R0; A0A146ZN37; G3NJM6	1429.33	4285.97	-1.769	-0.0025273	65.9916	127.256
High	MLGQNPTREELDEIIEEVDEDGSGTIDFEEFLVMMVR	A0A060WZV7	F5BZS8; B9EP57; H2SBN2; B9VJM4; H2L8Q7; A0A146V9Q1; A0A146P9L9; I3IZI3; H2L8Q9; A0A060WZV7; Q4RB38; A0A060YT85; H2L8R0; A0A146ZN37; G3NJM6	1429.33	4285.98	0.45254	0.000646526	89.3315	127.289
High	MLGQNPTREELDEIIEEVDEDGSGTIDFEEFLVMMVR	A0A060WZV7	F5BZS8; B9EP57; H2SBN2; B9VJM4; H2L8Q7; A0A146V9Q1; A0A146P9L9; I3IZI3; H2L8Q9; A0A060WZV7; Q4RB38; A0A060YT85; H2L8R0; A0A146ZN37; G3NJM6	1429.34	4285.99	2.16142	0.00308793	41.4748	127.354
High	EELDEIIEEVDEDGSGTIDFEEFLVMMVR	A0A060WZV7	F5BZS8; B9EP57; H2SBN2; B9VJM4; H2L8Q7; A0A146V9Q1; A0A146P9L9; I3IZI3; H2L8Q9; A0A060WZV7; Q4RB38; A0A060YT85; H2L8R0; A0A146ZN37; G3NJM6	1130.18	3388.53	-2.10124	-0.00237337	100	130.003
High	MLGQNPTREELDEIIEEVDEDGSGTIDFEEFLVMMVR	A0A060WZV7	F5BZS8; B9EP57; H2SBN2; B9VJM4; H2L8Q7; A0A146V9Q1; A0A146P9L9; I3IZI3; H2L8Q9; A0A060WZV7; Q4RB38; A0A060YT85; H2L8R0; A0A146ZN37; G3NJM6	1072.25	4285.98	-1.70093	-0.00182254	75.2496	124.149
High	MLGQNPTREELDEIIEEVDEDGSGTIDFEEFLVMMVR	A0A060WZV7	F5BZS8; B9EP57; H2SBN2; B9VJM4; H2L8Q7; A0A146V9Q1; A0A146P9L9; I3IZI3; H2L8Q9; A0A060WZV7; Q4RB38; A0A060YT85; H2L8R0; A0A146ZN37; G3NJM6	1429.33	4285.97	-3.99054	-0.00570113	99.9826	117.838
High	EELDEIIEEVDEDGSGTIDFEEFLVMMVR	A0A060WZV7	F5BZS8; B9EP57; H2SBN2; B9VJM4; H2L8Q7; A0A146V9Q1; A0A146P9L9; I3IZI3; H2L8Q9; A0A060WZV7; Q4RB38; A0A060YT85; H2L8R0; A0A146ZN37; G3NJM6	1130.18	3388.54	0.492528	0.000556316	100	139.507
High	MLGQNPTREELDEIIEEVDEDGSGTIDFEEFLVMMVR	A0A060WZV7	F5BZS8; B9EP57; H2SBN2; B9VJM4; H2L8Q7; A0A146V9Q1; A0A146P9L9; I3IZI3; H2L8Q9; A0A060WZV7; Q4RB38; A0A060YT85; H2L8R0; A0A146ZN37; G3NJM6	1429.33	4285.98	0.367096	0.000524456	75.4595	139.779
High	EELDEIIEEVDEDGSGTIDFEEFLVMMVR	A0A060WZV7	F5BZS8; B9EP57; H2SBN2; B9VJM4; H2L8Q7; A0A146V9Q1; A0A146P9L9; I3IZI3; H2L8Q9; A0A060WZV7; Q4RB38; A0A060YT85; H2L8R0; A0A146ZN37; G3NJM6	1130.18	3388.53	-1.4528	-0.00164095	100	148.988
High	EELDEIIEEVDEDGSGTIDFEEFLVMMVR	A0A060WZV7	F5BZS8; B9EP57; H2SBN2; B9VJM4; H2L8Q7; A0A146V9Q1; A0A146P9L9; I3IZI3; H2L8Q9; A0A060WZV7; Q4RB38; A0A060YT85; H2L8R0; A0A146ZN37; G3NJM6	1130.18	3388.53	-2.10124	-0.00237337	100	149.039
High	MLGQNPTREELDEIIEEVDEDGSGTIDFEEFLVMMVR	A0A060WZV7	F5BZS8; B9EP57; H2SBN2; B9VJM4; H2L8Q7; A0A146V9Q1; A0A146P9L9; I3IZI3; H2L8Q9; A0A060WZV7; Q4RB38; A0A060YT85; H2L8R0; A0A146ZN37; G3NJM6	1429.33	4285.98	-1.42723	-0.00203902	100	149.16
High	MLGQNPTREELDEIIEEVDEDGSGTIDFEEFLVMMVR	A0A060WZV7	F5BZS8; B9EP57; H2SBN2; B9VJM4; H2L8Q7; A0A146V9Q1; A0A146P9L9; I3IZI3; H2L8Q9; A0A060WZV7; Q4RB38; A0A060YT85; H2L8R0; A0A146ZN37; G3NJM6	1429.33	4285.97	-2.11078	-0.00301558	71.0454	149.21
High	MLGQNPTREELDEIIEEVDEDGSGTIDFEEFLVMMVR	A0A060WZV7	F5BZS8; B9EP57; H2SBN2; B9VJM4; H2L8Q7; A0A146V9Q1; A0A146P9L9; I3IZI3; H2L8Q9; A0A060WZV7; Q4RB38; A0A060YT85; H2L8R0; A0A146ZN37; G3NJM6	1429.33	4285.98	-0.231011	-0.000330037	100	149.242
High	MLGQNPTREELDEIIEEVDEDGSGTIDFEEFLVMMVR	A0A060WZV7	F5BZS8; B9EP57; H2SBN2; B9VJM4; H2L8Q7; A0A146V9Q1; A0A146P9L9; I3IZI3; H2L8Q9; A0A060WZV7; Q4RB38; A0A060YT85; H2L8R0; A0A146ZN37; G3NJM6	1429.33	4285.99	0.879759	0.00125688	77.8083	149.27
High	EELDEIIEEVDEDGSGTIDFEEFLVMMVR	A0A060WZV7	F5BZS8; B9EP57; H2SBN2; B9VJM4; H2L8Q7; A0A146V9Q1; A0A146P9L9; I3IZI3; H2L8Q9; A0A060WZV7; Q4RB38; A0A060YT85; H2L8R0; A0A146ZN37; G3NJM6	1130.18	3388.53	0.384454	0.000434245	100	152.05
High	EELDEIIEEVDEDGSGTIDFEEFLVMMVR	A0A060WZV7	F5BZS8; B9EP57; H2SBN2; B9VJM4; H2L8Q7; A0A146V9Q1; A0A146P9L9; I3IZI3; H2L8Q9; A0A060WZV7; Q4RB38; A0A060YT85; H2L8R0; A0A146ZN37; G3NJM6	1130.18	3388.53	-0.372061	-0.000420247	100	152.089
High	EELDEIIEEVDEDGSGTIDFEEFLVMMVR	A0A060WZV7	F5BZS8; B9EP57; H2SBN2; B9VJM4; H2L8Q7; A0A146V9Q1; A0A146P9L9; I3IZI3; H2L8Q9; A0A060WZV7; Q4RB38; A0A060YT85; H2L8R0; A0A146ZN37; G3NJM6	1130.18	3388.53	-1.99316	-0.0022513	100	152.122
High	EELDEIIEEVDEDGSGTIDFEEFLVMMVR	A0A060WZV7	F5BZS8; B9EP57; H2SBN2; B9VJM4; H2L8Q7; A0A146V9Q1; A0A146P9L9; I3IZI3; H2L8Q9; A0A060WZV7; Q4RB38; A0A060YT85; H2L8R0; A0A146ZN37; G3NJM6	1130.18	3388.53	-1.0205	-0.00115267	100	152.161
High	MLGQNPTREELDEIIEEVDEDGSGTIDFEEFLVMMVR	A0A060WZV7	F5BZS8; B9EP57; H2SBN2; B9VJM4; H2L8Q7; A0A146V9Q1; A0A146P9L9; I3IZI3; H2L8Q9; A0A060WZV7; Q4RB38; A0A060YT85; H2L8R0; A0A146ZN37; G3NJM6	1072.25	4286	2.97	0.00318234	100	152.295
High	MLGQNPTREELDEIIEEVDEDGSGTIDFEEFLVMMVR	A0A060WZV7	F5BZS8; B9EP57; H2SBN2; B9VJM4; H2L8Q7; A0A146V9Q1; A0A146P9L9; I3IZI3; H2L8Q9; A0A060WZV7; Q4RB38; A0A060YT85; H2L8R0; A0A146ZN37; G3NJM6	1429.33	4285.98	-1.68356	-0.00240523	100	152.34
High	MLGQNPTREELDEIIEEVDEDGSGTIDFEEFLVMMVR	A0A060WZV7	F5BZS8; B9EP57; H2SBN2; B9VJM4; H2L8Q7; A0A146V9Q1; A0A146P9L9; I3IZI3; H2L8Q9; A0A060WZV7; Q4RB38; A0A060YT85; H2L8R0; A0A146ZN37; G3NJM6	1429.33	4285.98	0.367096	0.000524456	98.9759	152.389
High	MLGQNPTREELDEIIEEVDEDGSGTIDFEEFLVMMVR	A0A060WZV7	F5BZS8; B9EP57; H2SBN2; B9VJM4; H2L8Q7; A0A146V9Q1; A0A146P9L9; I3IZI3; H2L8Q9; A0A060WZV7; Q4RB38; A0A060YT85; H2L8R0; A0A146ZN37; G3NJM6	1429.33	4285.98	0.45254	0.000646526	100	152.422
High	EELDEIIEEVDEDGSGTIDFEEFLVMMVR	A0A060WZV7	F5BZS8; B9EP57; H2SBN2; B9VJM4; H2L8Q7; A0A146V9Q1; A0A146P9L9; I3IZI3; H2L8Q9; A0A060WZV7; Q4RB38; A0A060YT85; H2L8R0; A0A146ZN37; G3NJM6	1130.18	3388.53	0.276381	0.000312175	100	155.167
High	EELDEIIEEVDEDGSGTIDFEEFLVMMVR	A0A060WZV7	F5BZS8; B9EP57; H2SBN2; B9VJM4; H2L8Q7; A0A146V9Q1; A0A146P9L9; I3IZI3; H2L8Q9; A0A060WZV7; Q4RB38; A0A060YT85; H2L8R0; A0A146ZN37; G3NJM6	1130.18	3388.53	0.0602336	6.80345e-05	100	148.961
High	EELDEIIEEVDEDGSGTIDFEEFLVMMVR	A0A060WZV7	F5BZS8; B9EP57; H2SBN2; B9VJM4; H2L8Q7; A0A146V9Q1; A0A146P9L9; I3IZI3; H2L8Q9; A0A060WZV7; Q4RB38; A0A060YT85; H2L8R0; A0A146ZN37; G3NJM6	1130.18	3388.53	-0.804355	-0.000908528	100	148.888
High	MLGQNPTREELDEIIEEVDEDGSGTIDFEEFLVMMVR	A0A060WZV7	F5BZS8; B9EP57; H2SBN2; B9VJM4; H2L8Q7; A0A146V9Q1; A0A146P9L9; I3IZI3; H2L8Q9; A0A060WZV7; Q4RB38; A0A060YT85; H2L8R0; A0A146ZN37; G3NJM6	1429.33	4285.98	-1.34178	-0.00191695	100	146.126
High	MLGQNPTREELDEIIEEVDEDGSGTIDFEEFLVMMVR	A0A060WZV7	F5BZS8; B9EP57; H2SBN2; B9VJM4; H2L8Q7; A0A146V9Q1; A0A146P9L9; I3IZI3; H2L8Q9; A0A060WZV7; Q4RB38; A0A060YT85; H2L8R0; A0A146ZN37; G3NJM6	1072.25	4286	2.97	0.00318234	100	146.081
High	MLGQNPTREELDEIIEEVDEDGSGTIDFEEFLVMMVR	A0A060WZV7	F5BZS8; B9EP57; H2SBN2; B9VJM4; H2L8Q7; A0A146V9Q1; A0A146P9L9; I3IZI3; H2L8Q9; A0A060WZV7; Q4RB38; A0A060YT85; H2L8R0; A0A146ZN37; G3NJM6	1429.33	4285.99	1.47787	0.00211137	100	139.818
High	MLGQNPTREELDEIIEEVDEDGSGTIDFEEFLVMMVR	A0A060WZV7	F5BZS8; B9EP57; H2SBN2; B9VJM4; H2L8Q7; A0A146V9Q1; A0A146P9L9; I3IZI3; H2L8Q9; A0A060WZV7; Q4RB38; A0A060YT85; H2L8R0; A0A146ZN37; G3NJM6	1429.33	4285.98	0.45254	0.000646526	100	139.857
High	MLGQNPTREELDEIIEEVDEDGSGTIDFEEFLVMMVR	A0A060WZV7	F5BZS8; B9EP57; H2SBN2; B9VJM4; H2L8Q7; A0A146V9Q1; A0A146P9L9; I3IZI3; H2L8Q9; A0A060WZV7; Q4RB38; A0A060YT85; H2L8R0; A0A146ZN37; G3NJM6	1429.33	4285.98	-1.00001	-0.00142867	68.2343	139.895
High	EELDEIIEEVDEDGSGTIDFEEFLVMMVR	A0A060WZV7	F5BZS8; B9EP57; H2SBN2; B9VJM4; H2L8Q7; A0A146V9Q1; A0A146P9L9; I3IZI3; H2L8Q9; A0A060WZV7; Q4RB38; A0A060YT85; H2L8R0; A0A146ZN37; G3NJM6	1130.19	3388.54	2.11363	0.00238737	100	142.583
High	EELDEIIEEVDEDGSGTIDFEEFLVMMVR	A0A060WZV7	F5BZS8; B9EP57; H2SBN2; B9VJM4; H2L8Q7; A0A146V9Q1; A0A146P9L9; I3IZI3; H2L8Q9; A0A060WZV7; Q4RB38; A0A060YT85; H2L8R0; A0A146ZN37; G3NJM6	1130.18	3388.53	-0.155914	-0.000176106	100	142.66
High	EELDEIIEEVDEDGSGTIDFEEFLVMMVR	A0A060WZV7	F5BZS8; B9EP57; H2SBN2; B9VJM4; H2L8Q7; A0A146V9Q1; A0A146P9L9; I3IZI3; H2L8Q9; A0A060WZV7; Q4RB38; A0A060YT85; H2L8R0; A0A146ZN37; G3NJM6	1130.18	3388.53	-1.34472	-0.00151888	100	142.732
High	MLGQNPTREELDEIIEEVDEDGSGTIDFEEFLVMMVR	A0A060WZV7	F5BZS8; B9EP57; H2SBN2; B9VJM4; H2L8Q7; A0A146V9Q1; A0A146P9L9; I3IZI3; H2L8Q9; A0A060WZV7; Q4RB38; A0A060YT85; H2L8R0; A0A146ZN37; G3NJM6	1429.33	4285.99	0.623428	0.000890666	100	142.9
High	EELDEIIEEVDEDGSGTIDFEEFLVMMVR	A0A060WZV7	F5BZS8; B9EP57; H2SBN2; B9VJM4; H2L8Q7; A0A146V9Q1; A0A146P9L9; I3IZI3; H2L8Q9; A0A060WZV7; Q4RB38; A0A060YT85; H2L8R0; A0A146ZN37; G3NJM6	1130.19	3388.54	2.11363	0.00238737	100	139.535
High	MLGQNPTREELDEIIEEVDEDGSGTIDFEEFLVMMVR	A0A060WZV7	F5BZS8; B9EP57; H2SBN2; B9VJM4; H2L8Q7; A0A146V9Q1; A0A146P9L9; I3IZI3; H2L8Q9; A0A060WZV7; Q4RB38; A0A060YT85; H2L8R0; A0A146ZN37; G3NJM6	1429.34	4285.99	2.84497	0.00406449	73.416	142.939
High	MLGQNPTREELDEIIEEVDEDGSGTIDFEEFLVMMVR	A0A060WZV7	F5BZS8; B9EP57; H2SBN2; B9VJM4; H2L8Q7; A0A146V9Q1; A0A146P9L9; I3IZI3; H2L8Q9; A0A060WZV7; Q4RB38; A0A060YT85; H2L8R0; A0A146ZN37; G3NJM6	1429.33	4285.97	-2.28166	-0.00325972	100	143.006
High	EELDEIIEEVDEDGSGTIDFEEFLVMMVR	A0A060WZV7	F5BZS8; B9EP57; H2SBN2; B9VJM4; H2L8Q7; A0A146V9Q1; A0A146P9L9; I3IZI3; H2L8Q9; A0A060WZV7; Q4RB38; A0A060YT85; H2L8R0; A0A146ZN37; G3NJM6	1130.18	3388.53	-2.31739	-0.00261751	100	145.747
High	EELDEIIEEVDEDGSGTIDFEEFLVMMVR	A0A060WZV7	F5BZS8; B9EP57; H2SBN2; B9VJM4; H2L8Q7; A0A146V9Q1; A0A146P9L9; I3IZI3; H2L8Q9; A0A060WZV7; Q4RB38; A0A060YT85; H2L8R0; A0A146ZN37; G3NJM6	1130.18	3388.53	-1.99316	-0.0022513	100	145.78
High	EELDEIIEEVDEDGSGTIDFEEFLVMMVR	A0A060WZV7	F5BZS8; B9EP57; H2SBN2; B9VJM4; H2L8Q7; A0A146V9Q1; A0A146P9L9; I3IZI3; H2L8Q9; A0A060WZV7; Q4RB38; A0A060YT85; H2L8R0; A0A146ZN37; G3NJM6	1130.18	3388.54	0.708675	0.000800456	100	145.847
High	EELDEIIEEVDEDGSGTIDFEEFLVMMVR	A0A060WZV7	F5BZS8; B9EP57; H2SBN2; B9VJM4; H2L8Q7; A0A146V9Q1; A0A146P9L9; I3IZI3; H2L8Q9; A0A060WZV7; Q4RB38; A0A060YT85; H2L8R0; A0A146ZN37; G3NJM6	1130.18	3388.53	-0.263987	-0.000298176	100	145.874
High	MLGQNPTREELDEIIEEVDEDGSGTIDFEEFLVMMVR	A0A060WZV7	F5BZS8; B9EP57; H2SBN2; B9VJM4; H2L8Q7; A0A146V9Q1; A0A146P9L9; I3IZI3; H2L8Q9; A0A060WZV7; Q4RB38; A0A060YT85; H2L8R0; A0A146ZN37; G3NJM6	1429.33	4285.98	0.110764	0.000158245	77.9083	146.01
High	MLGQNPTREELDEIIEEVDEDGSGTIDFEEFLVMMVR	A0A060WZV7	F5BZS8; B9EP57; H2SBN2; B9VJM4; H2L8Q7; A0A146V9Q1; A0A146P9L9; I3IZI3; H2L8Q9; A0A060WZV7; Q4RB38; A0A060YT85; H2L8R0; A0A146ZN37; G3NJM6	1072.25	4285.99	1.48897	0.00159542	100	146.048
High	MLGQNPTREELDEIIEEVDEDGSGTIDFEEFLVMMVR	A0A060WZV7	F5BZS8; B9EP57; H2SBN2; B9VJM4; H2L8Q7; A0A146V9Q1; A0A146P9L9; I3IZI3; H2L8Q9; A0A060WZV7; Q4RB38; A0A060YT85; H2L8R0; A0A146ZN37; G3NJM6	1429.33	4285.97	-2.02533	-0.00289351	100	142.972
High	GGDDLDPNYVISSR		C0H8B9; C1BGT5; C1BGR4; A0A060VML0; P24722	754.355	1507.7	0.0753444	5.67984e-05	100	56.8672
High	MLGQNPTREELDEIIEEVDEDGSGTIDFEEFLVMMVR	A0A060WZV7	F5BZS8; B9EP57; H2SBN2; B9VJM4; H2L8Q7; A0A146V9Q1; A0A146P9L9; I3IZI3; H2L8Q9; A0A060WZV7; Q4RB38; A0A060YT85; H2L8R0; A0A146ZN37; G3NJM6	1072.25	4285.98	-0.105983	-0.00011356	73.5096	114.809
High	MLGQNPTREELDEIIEEVDEDGSGTIDFEEFLVMMVR	A0A060WZV7	F5BZS8; B9EP57; H2SBN2; B9VJM4; H2L8Q7; A0A146V9Q1; A0A146P9L9; I3IZI3; H2L8Q9; A0A060WZV7; Q4RB38; A0A060YT85; H2L8R0; A0A146ZN37; G3NJM6	1429.33	4285.99	0.879759	0.00125688	26.2393	114.746
High	GIQIVTSPYTILFK	A0A060W1F1; A0A060XSW8; A0A060VZH2	A0A060W1F1; A0A060XSW8; A0A060VZH2	790.458	1579.91	0.118486	9.35986e-05	70.6478	77.7996
High	SVVLDQANNFQAMTQLVIPEGDHFVDDPKQK	A0A060W1F1; A0A060ZDQ0	A0A060W1F1; A0A060ZDQ0	871.687	3483.73	1.6936	0.00147501	21.2151	79.2789
High	IDYDEFLEFMK	A0A146ZZT0	A0A0P7UTI8; H2MYQ9; I3KKJ3; G3PQU8; W5LRA5; A0A087XTY9; A0A0S7M3G5; I3KNH1; Q7ZZB9; A0A060XPN3; C1BL97; C1BWR8; M4ATM4; A0A087XE68; C3KI12; B5X8Q3; Q5XJB2; A0A146ZZT0; M4AKK8; G3PHV3; A0A0P7W7U4; A0A060Z0B8; D6PVT0; Q800V7; C3KGS3; H2M7W2; B5X7T1; H2SLG9; B5XCS2; E3TGE9; Q4S5I9	725.335	1449.66	0.958903	0.000695042	70.3388	80.9683
High	IDYDEFLEFMK	A0A146ZZT0	A0A0P7UTI8; H2MYQ9; I3KKJ3; G3PQU8; W5LRA5; A0A087XTY9; A0A0S7M3G5; I3KNH1; Q7ZZB9; A0A060XPN3; C1BL97; C1BWR8; M4ATM4; A0A087XE68; C3KI12; B5X8Q3; Q5XJB2; A0A146ZZT0; M4AKK8; G3PHV3; A0A0P7W7U4; A0A060Z0B8; D6PVT0; Q800V7; C3KGS3; H2M7W2; B5X7T1; H2SLG9; B5XCS2; E3TGE9; Q4S5I9	725.333	1449.66	-0.977838	-0.000708767	100	81.157
High	EADIDGDGQVNYEEFVQMMTAK	A0A0F8AUE5	A0A146X7J1; Q6R520; C1BHV5; H3DI88; G3PGF2; A0A0P7ULQ0; G3P4Z6; A0A060WZJ2; A0A147AAY6; A0A0F8ANM6; A0A060WVU0; I3IXY6; A0A060Y0G1; F1C7D1; E3TFE6; A0A060W7T8; A0A0P7XV73; A0A060XPD1; A0A0P7UM01; A0A060WIX3; Q3ZLF2; G3NDL7; C0H8K4; Q71S42; B5AS02; A0A0F8AUE5; A0A060YSJ4; A0A146PHS2; A0A0F8CEZ5; A0A0S7GN41; B9ENM0; Q804H6; A0A060Y7X2; P02594; A0A0F8AU34	830.701	2490.09	3.84761	0.00319362	24.858	81.2407
High	EADIDGDGQVNYEEFVQMMTAK	A0A0F8AUE5	A0A146X7J1; Q6R520; C1BHV5; H3DI88; G3PGF2; A0A0P7ULQ0; G3P4Z6; A0A060WZJ2; A0A147AAY6; A0A0F8ANM6; A0A060WVU0; I3IXY6; A0A060Y0G1; F1C7D1; E3TFE6; A0A060W7T8; A0A0P7XV73; A0A060XPD1; A0A0P7UM01; A0A060WIX3; Q3ZLF2; G3NDL7; C0H8K4; Q71S42; B5AS02; A0A0F8AUE5; A0A060YSJ4; A0A146PHS2; A0A0F8CEZ5; A0A0S7GN41; B9ENM0; Q804H6; A0A060Y7X2; P02594; A0A0F8AU34	1245.54	2490.08	-0.510008	-0.00063498	69.411	81.2722
High	VIHDNFGIVEGLMSTVHAITATQK	Q8AWX8	Q8AWX8; C3VMM8; A0A0F8CPA8; B5AAJ5	646.09	2581.34	-1.66439	-0.00107409	70.6142	82.0955
High	LNFDAFLPMLK	B9V2Y1	B6VCB3; H2TBH9; A0A146SAL6; Q4SMB6; I3K6V3; A0A0S7MDP0; B7U3X5; B9V2Y1; F2WR27; A0A147A177; H2LAV5; H3CSC1; A0A146P771; A0A087Y5E6; A0A147A2F8; P82160; A0A096MH75; Q90W40	654.855	1308.7	1.13285	0.00074128	60.4627	82.1419
High	INFDAFLPMLK		A0A0F8AVT1; Q9IB29	654.855	1308.7	1.13285	0.00074128	60.4627	82.1419
High	INFDAFLPMLK		A0A0F8AVT1; Q9IB29	654.854	1308.7	-1.47888	-0.000967705	30.7196	82.27
High	LNFDAFLPMLK	B9V2Y1	B6VCB3; H2TBH9; A0A146SAL6; Q4SMB6; I3K6V3; A0A0S7MDP0; B7U3X5; B9V2Y1; F2WR27; A0A147A177; H2LAV5; H3CSC1; A0A146P771; A0A087Y5E6; A0A147A2F8; P82160; A0A096MH75; Q90W40	654.854	1308.7	-1.47888	-0.000967705	30.7196	82.27
High	NGLMVAEIEELRAALEQTER	B1Q382; A0A087XQZ5; P87344; Q98TQ5; Q33BP2	B1Q382; C4TIP3; M3ZPQ1; A0A0S7JAN2; A0A087XQZ5; A0A0S7J8H5; A0A0S7J8I5; B1Q383; A0A146ZZE3; I3JYT9; P87344; Q98TQ5; B7SVK2; I3IZY4; A0A0S7J8G1; Q33BP2; I3IZY3; Q8JIV4	758.058	2272.16	0.304199	0.000230396	32.6244	82.6299
High	RVDFEGFLPMMQTIVNSPNK	Q9IB19	Q9IB19	775.059	2323.16	2.54319	0.00196941	37.0627	82.9786
High	RVDFEGFLPMMQTIVNSPNK	Q9IB19	Q9IB19	775.057	2323.16	-0.29424	-0.000227856	73.627	83.0295
High	LAMQEFMILPVGAANFHEAMR	A0A0E9XJJ3	A0A0P7UEW6; F5BZS7; A0A0E9XJJ3; G3N816; A0A0F8AN77; D6PVP1; H2RQ53; Q4TBD1; H3CAK5	792.727	2376.17	0.276782	0.000219226	45.4858	83.5453
High	MLGQNPTREELDEIIEEVDEDGSGTIDFEEFLVMMVR	A0A060WZV7	F5BZS8; B9EP57; H2SBN2; B9VJM4; H2L8Q7; A0A146V9Q1; A0A146P9L9; I3IZI3; H2L8Q9; A0A060WZV7; Q4RB38; A0A060YT85; H2L8R0; A0A146ZN37; G3NJM6	1429.33	4285.99	1.05065	0.00150102	100	155.562
High	EELDEIIEEVDEDGSGTIDFEEFLVMMVR	A0A060WZV7	F5BZS8; B9EP57; H2SBN2; B9VJM4; H2L8Q7; A0A146V9Q1; A0A146P9L9; I3IZI3; H2L8Q9; A0A060WZV7; Q4RB38; A0A060YT85; H2L8R0; A0A146ZN37; G3NJM6	1130.18	3388.53	-2.31739	-0.00261751	100	158.29
High	EELDEIIEEVDEDGSGTIDFEEFLVMMVR	A0A060WZV7	F5BZS8; B9EP57; H2SBN2; B9VJM4; H2L8Q7; A0A146V9Q1; A0A146P9L9; I3IZI3; H2L8Q9; A0A060WZV7; Q4RB38; A0A060YT85; H2L8R0; A0A146ZN37; G3NJM6	1130.18	3388.53	-2.31739	-0.00261751	100	158.322
High	LLALYETISQAMKA	B5XFF2	B5XFF2	776.425	1551.84	-0.991092	-0.000769011	16.6118	76.0994
High	AAAGDSGSSNVFSMFEQSQIQEYK	F8U029	F8U029	861.054	2581.15	-1.68887	-0.00145307	28.7135	75.1209
High	AAAGDSGSSNVFSMFEQSQIQEYK	F8U029	F8U029	861.054	2581.15	-1.05041	-0.000903758	35.0852	75.1675
High	MLGQNPTREELDEIIEEVDEDGSGTIDFEEFLVMMVR	A0A060WZV7	F5BZS8; B9EP57; H2SBN2; B9VJM4; H2L8Q7; A0A146V9Q1; A0A146P9L9; I3IZI3; H2L8Q9; A0A060WZV7; Q4RB38; A0A060YT85; H2L8R0; A0A146ZN37; G3NJM6	1429.34	4285.99	2.41775	0.00345414	100	158.572
High	AISEELDHALNDMTSL	A0A087XSB4	G3PBG3; H2RS11; A0A146VDU0; H2RS10; I3J232; Q805C5; Q1LXM1; H2MRC9; H2RS09; Q91489; H2RS08; A0A087XSB4; A0A060WIN1; A0A0F8D2I6; A0A146VDT9; F1QKG7	879.915	1758.82	0.97361	0.000856203	25.2727	75.6488
High	AISEELDHALNDMTSI	D6PVP3; Q8AV86; Q8JIM7; A0A087YEU9; A0A087YF71; P13104; E3TFQ0; H2MA79	H3CSI6; A0A0S7K1B6; K4PEK4; D6PVP3; E3TC29; G1FCF2; Q6P0W3; Q8AV86; Q8JIM7; H2M5M4; X2J4M2; Q805D2; I3J2Q1; A0A146W5R6; F6NVA3; W5KS79; Q8JIM8; A0A146NCI0; A0A0S7FXE9; Q91490; I3JVV2; W5JYT8; A0A087YEU9; A0A087YF71; A0A146WFT2; A0A146YH85; P13104; W5UMT9; A0A087XA45; Q76CT4; Q7ZVK9; Q9DEB7; B9V2W9; E3TFQ0; H2MA79; H2TF14; F2WR17; W5JZC9; H3C493	879.915	1758.82	0.97361	0.000856203	25.2727	75.6488
High	SLAPYTTVFGTQLADATATVR	B5XFF2	B5XFF2	728.383	2183.13	-0.34604	-0.000251817	33.3466	75.6534
High	EELDEIIEEVDEDGSGTIDFEEFLVMMVR	A0A060WZV7	F5BZS8; B9EP57; H2SBN2; B9VJM4; H2L8Q7; A0A146V9Q1; A0A146P9L9; I3IZI3; H2L8Q9; A0A060WZV7; Q4RB38; A0A060YT85; H2L8R0; A0A146ZN37; G3NJM6	1130.18	3388.52	-2.74968	-0.00310579	100	158.4
High	LAMQEFMILPVGAANFHEAMR	A0A0E9XJJ3	A0A0P7UEW6; F5BZS7; A0A0E9XJJ3; G3N816; A0A0F8AN77; D6PVP1; H2RQ53; Q4TBD1; H3CAK5	792.727	2376.17	0.0456041	3.61209e-05	43.8089	83.5824
High	EELDEIIEEVDEDGSGTIDFEEFLVMMVR	A0A060WZV7	F5BZS8; B9EP57; H2SBN2; B9VJM4; H2L8Q7; A0A146V9Q1; A0A146P9L9; I3IZI3; H2L8Q9; A0A060WZV7; Q4RB38; A0A060YT85; H2L8R0; A0A146ZN37; G3NJM6	1130.19	3388.54	2.32978	0.00263151	100	158.367
High	SLAPYTTVFGTQLADATATVR	B5XFF2	B5XFF2	728.383	2183.13	0.0733241	5.33588e-05	20.3501	75.7447
High	WGDAGAQYVVESTGVFTTIEK	Q8AWX8	J9TGM4; F5BZT5; Q8AWX8; H9B644; E7CN50; B8Y1B3; G3KG80; A1IGU6; Q155W8; G3P7L3; G8G8Z6; B5AAJ5; Q5NDA0; F6KMK4; S4TLM3; D6BNU6	753.368	2258.09	-3.93978	-0.00296547	23.7196	75.7994
High	WGDAGAQYVVESTGVFTTIEK	Q8AWX8	J9TGM4; F5BZT5; Q8AWX8; H9B644; E7CN50; B8Y1B3; G3KG80; A1IGU6; Q155W8; G3P7L3; G8G8Z6; B5AAJ5; Q5NDA0; F6KMK4; S4TLM3; D6BNU6	1129.56	2258.11	5.58055	0.00630071	29.0157	75.8404
High	WGDAGAQYVVESTGVFTTIEK	Q8AWX8	J9TGM4; F5BZT5; Q8AWX8; H9B644; E7CN50; B8Y1B3; G3KG80; A1IGU6; Q155W8; G3P7L3; G8G8Z6; B5AAJ5; Q5NDA0; F6KMK4; S4TLM3; D6BNU6	753.37	2258.09	-1.50713	-0.00113441	36.1416	75.8955
High	WGDAGAQYVVESTGVFTTIEK	Q8AWX8	J9TGM4; F5BZT5; Q8AWX8; H9B644; E7CN50; B8Y1B3; G3KG80; A1IGU6; Q155W8; G3P7L3; G8G8Z6; B5AAJ5; Q5NDA0; F6KMK4; S4TLM3; D6BNU6	753.37	2258.1	-0.2908	-0.000218885	49.2582	75.9278
High	LLALYETISQAMKA	B5XFF2	B5XFF2	776.428	1551.85	1.91938	0.00148929	40.244	75.974
High	LLALYETISQAMKA	B5XFF2	B5XFF2	776.426	1551.84	-0.361801	-0.00028073	16.5318	76.0548
High	SLAPYTTVFGTQLADATATVR	B5XFF2	B5XFF2	1092.07	2183.13	-1.09474	-0.00119498	17.7522	75.7144
High	MLGQNPTREELDEIIEEVDEDGSGTIDFEEFLVMMVR	A0A060WZV7	F5BZS8; B9EP57; H2SBN2; B9VJM4; H2L8Q7; A0A146V9Q1; A0A146P9L9; I3IZI3; H2L8Q9; A0A060WZV7; Q4RB38; A0A060YT85; H2L8R0; A0A146ZN37; G3NJM6	1429.33	4285.98	-0.231011	-0.000330037	36.8628	114.783
High	ALSEELDLALNDMTTL	A0A147AWH1; A0A0S7K258	Q4TI88; B9ELP6; Q4T142; H3C7I0; A0A060WSI3; H2TYG5; Q6IQD7; Q805C8; A0A147AWH1; A0A0S7K258; I3K0E5; A0A146YIN5; H2MCV5; M3ZZE4; G3Q402; H3DQ51; W5KTD3; G3Q3Z9	874.935	1748.86	0.263604	0.000230504	61.5182	86.3918
High	LFIGGLSFDTNEESLMAAFAK	A0A067XL60	A0A067XL60	1131.06	2261.11	-1.76119	-0.00199112	46.4502	90.6239
High	MLGQNPTREELDEIIEEVDEDGSGTIDFEEFLVMMVR	A0A060WZV7	F5BZS8; B9EP57; H2SBN2; B9VJM4; H2L8Q7; A0A146V9Q1; A0A146P9L9; I3IZI3; H2L8Q9; A0A060WZV7; Q4RB38; A0A060YT85; H2L8R0; A0A146ZN37; G3NJM6	1429.34	4285.99	2.07597	0.00296586	87.0416	107.858
High	MLGQNPTREELDEIIEEVDEDGSGTIDFEEFLVMMVR	A0A060WZV7	F5BZS8; B9EP57; H2SBN2; B9VJM4; H2L8Q7; A0A146V9Q1; A0A146P9L9; I3IZI3; H2L8Q9; A0A060WZV7; Q4RB38; A0A060YT85; H2L8R0; A0A146ZN37; G3NJM6	1429.33	4285.98	0.110764	0.000158245	100	108.107
High	MLGQNPTPEELQEMIDEVDEDGSGTVDFDEFLVMMVR	A0A146ZZT0	A0A0F8BCP7; A0A0P7UTI8; H2MYQ9; Q4TC84; I3KKJ3; G3PQU8; W5KP59; A0A0S7M3G5; A0A146Y007; I3KNH1; Q7ZZB9; A0A060XPN3; C1BL97; M4ATM4; A0A087XE68; C3KI12; A0A146R3F0; B5X8Q3; A0A146ZZT0; A0A147AQ69; M4AKK8; G3PHV3; A0A0P7W7U4; D6PVT0; C3KGS3; H2M7W2; B5X7T1; H2SLG9; Q4S5I9; H2RZ85	1405.96	4215.86	-3.05714	-0.00429618	100	108.146
High	MLGQNPTPEELQEMIDEVDEDGSGTVDFDEFLVMMVR	A0A146ZZT0	A0A0F8BCP7; A0A0P7UTI8; H2MYQ9; Q4TC84; I3KKJ3; G3PQU8; W5KP59; A0A0S7M3G5; A0A146Y007; I3KNH1; Q7ZZB9; A0A060XPN3; C1BL97; M4ATM4; A0A087XE68; C3KI12; A0A146R3F0; B5X8Q3; A0A146ZZT0; A0A147AQ69; M4AKK8; G3PHV3; A0A0P7W7U4; D6PVT0; C3KGS3; H2M7W2; B5X7T1; H2SLG9; Q4S5I9; H2RZ85	1405.96	4215.86	-2.44909	-0.00344169	52.1085	108.185
High	MLGQNPTREELDEIIEEVDEDGSGTIDFEEFLVMMVR	A0A060WZV7	F5BZS8; B9EP57; H2SBN2; B9VJM4; H2L8Q7; A0A146V9Q1; A0A146P9L9; I3IZI3; H2L8Q9; A0A060WZV7; Q4RB38; A0A060YT85; H2L8R0; A0A146ZN37; G3NJM6	1429.33	4285.97	-2.02533	-0.00289351	47.1776	108.372
High	MLGQNPTREELDEIIEEVDEDGSGTIDFEEFLVMMVR	A0A060WZV7	F5BZS8; B9EP57; H2SBN2; B9VJM4; H2L8Q7; A0A146V9Q1; A0A146P9L9; I3IZI3; H2L8Q9; A0A060WZV7; Q4RB38; A0A060YT85; H2L8R0; A0A146ZN37; G3NJM6	1072.25	4285.97	-3.75159	-0.00401981	29.8964	108.448
High	MLGQNPTREELDEIIEEVDEDGSGTIDFEEFLVMMVR	A0A060WZV7	F5BZS8; B9EP57; H2SBN2; B9VJM4; H2L8Q7; A0A146V9Q1; A0A146P9L9; I3IZI3; H2L8Q9; A0A060WZV7; Q4RB38; A0A060YT85; H2L8R0; A0A146ZN37; G3NJM6	1072.25	4285.99	2.0586	0.00220578	15.6092	108.492
High	MLGQNPTREELDEIIEEVDEDGSGTIDFEEFLVMMVR	A0A060WZV7	F5BZS8; B9EP57; H2SBN2; B9VJM4; H2L8Q7; A0A146V9Q1; A0A146P9L9; I3IZI3; H2L8Q9; A0A060WZV7; Q4RB38; A0A060YT85; H2L8R0; A0A146ZN37; G3NJM6	1429.33	4285.97	-1.85444	-0.00264937	33.234	108.541
High	VEIVAINDPFIDLEYMVYMFK	Q8AWX8	C6FGX0; B5B301; C6FGU8; Q5I1Z5; A0A146RLE8; G9J5R6; F5BZT5; B7U6G4; Q8AWX8; I3K556; Q4SND7; S4SRW0; Q3S910; B5SXM1; Q9PTW5; H3CRI0; B8Y1B3; Q98TL7; Q155W8; G3P7L3; G8G8Z6; B5AAJ5; H2S8H3; F6KMK4; A0A142K3N8; A9JPH9; D7RF66; A0A141GF44	850.429	2549.27	0.730727	0.00062094	100	109.036
High	MLGQNPTREELDEIIEEVDEDGSGTIDFEEFLVMMVR	A0A060WZV7	F5BZS8; B9EP57; H2SBN2; B9VJM4; H2L8Q7; A0A146V9Q1; A0A146P9L9; I3IZI3; H2L8Q9; A0A060WZV7; Q4RB38; A0A060YT85; H2L8R0; A0A146ZN37; G3NJM6	1429.33	4285.98	-0.401899	-0.000574177	18.1467	111.578
High	MLGQNPTREELDEIIEEVDEDGSGTIDFEEFLVMMVR	A0A060WZV7	F5BZS8; B9EP57; H2SBN2; B9VJM4; H2L8Q7; A0A146V9Q1; A0A146P9L9; I3IZI3; H2L8Q9; A0A060WZV7; Q4RB38; A0A060YT85; H2L8R0; A0A146ZN37; G3NJM6	1072.25	4285.98	-1.13131	-0.00121219	19.8436	111.62
High	MLGQNPTREELDEIIEEVDEDGSGTIDFEEFLVMMVR	A0A060WZV7	F5BZS8; B9EP57; H2SBN2; B9VJM4; H2L8Q7; A0A146V9Q1; A0A146P9L9; I3IZI3; H2L8Q9; A0A060WZV7; Q4RB38; A0A060YT85; H2L8R0; A0A146ZN37; G3NJM6	1072.25	4285.98	-0.675609	-0.000723912	21.7889	111.647
High	MLGQNPTREELDEIIEEVDEDGSGTIDFEEFLVMMVR	A0A060WZV7	F5BZS8; B9EP57; H2SBN2; B9VJM4; H2L8Q7; A0A146V9Q1; A0A146P9L9; I3IZI3; H2L8Q9; A0A060WZV7; Q4RB38; A0A060YT85; H2L8R0; A0A146ZN37; G3NJM6	1072.25	4285.98	0.121868	0.000130581	19.1092	111.689
High	SLILVGLAQNLPDSTLGDLVPLIAEALAMGVK	P21848	P21848; Q03156	1077.95	3231.83	-0.685653	-0.000738637	38.4754	112.903
High	MLGQNPTREELDEIIEEVDEDGSGTIDFEEFLVMMVR	A0A060WZV7	F5BZS8; B9EP57; H2SBN2; B9VJM4; H2L8Q7; A0A146V9Q1; A0A146P9L9; I3IZI3; H2L8Q9; A0A060WZV7; Q4RB38; A0A060YT85; H2L8R0; A0A146ZN37; G3NJM6	1072.25	4285.98	0.235793	0.000252651	31.6405	114.714
High	SLGQNPTEAELQDMINEVDADGNGTIDFPEFLTMMAR	A0A0F8AUE5	B5XCM2; Q6R520; A0A0B4ZZW5; C1BHV5; H3DI88; A0A146R5I5; G3PGF2; A0A0P7ULQ0; V5TGZ4; G3P4Z6; Q20AK9; A0A060WZJ2; A0A147AAY6; A0A0F8ANM6; A0A060WVU0; A0A147A285; I3IXY6; A0A060Y0G1; C1BLP2; A0A0P7XGF1; F1C7D1; C1BXP0; A0A060W7T8; A0A0P7XV73; A0A0P7UK75; A0A0S7GIA7; H3CDX1; A0A060XPD1; A0A0P7UM01; A0A060WIX3; A0A060XT19; C1BIJ2; G3NDL7; Q7T3T2; A0A146TMD7; P62150; A0A146NRJ8; Q4RN51; C0H8K4; A0A0N8K…	1357.29	4069.85	-0.26084	-0.00035386	27.7154	104.036
High	SGFIEEDELKLFLQVFSAGAR	P56503	P86758; P86775; P86771; P86753; P86762; P56503; P86757; P86769	786.078	2356.22	0.00827014	6.49542e-06	49.9195	95.329
High	SGFIEEDELKLFLQVFSAGAR	P56503	P86758; P86775; P86771; P86753; P86762; P56503; P86757; P86769	786.077	2356.22	-0.768846	-0.000603856	81.701	95.2902
High	SGFIEEDELKLFLQVFSAGAR	P56503	P86758; P86775; P86771; P86753; P86762; P56503; P86757; P86769	786.074	2356.21	-4.65443	-0.00365561	71.0655	95.2348
High	LFIGGLSFDTNEESLMAAFAK	A0A067XL60	A0A067XL60	1131.06	2261.11	-3.38079	-0.00382218	90.6799	90.6607
High	LFIGGLSFDTNEESLMAAFAK	A0A067XL60	A0A067XL60	754.376	2261.11	-0.768378	-0.00057913	63.0366	90.7043
High	LFIGGLSFDTNEESLMAAFAK	A0A067XL60	A0A067XL60	1131.06	2261.12	1.90991	0.00215927	70.0567	90.7367
High	LVQLPTTTDSFLYLGAEYMSTIRSLKK	P80429	B9U452; P80426; B5X2B3; B9U455; P80429	769.667	3075.65	0.624942	0.000480525	64.7567	91.0882
High	MLGQNPTREELDEIIEEVDEDGSGTIDFEEFLVMMVR	A0A060WZV7	F5BZS8; B9EP57; H2SBN2; B9VJM4; H2L8Q7; A0A146V9Q1; A0A146P9L9; I3IZI3; H2L8Q9; A0A060WZV7; Q4RB38; A0A060YT85; H2L8R0; A0A146ZN37; G3NJM6	1429.33	4285.98	-0.401899	-0.000574177	70.0792	155.486
High	EELDEIIEEVDEDGSGTIDFEEFLVMMVR	A0A060WZV7	F5BZS8; B9EP57; H2SBN2; B9VJM4; H2L8Q7; A0A146V9Q1; A0A146P9L9; I3IZI3; H2L8Q9; A0A060WZV7; Q4RB38; A0A060YT85; H2L8R0; A0A146ZN37; G3NJM6	1130.18	3388.53	-0.155914	-0.000176106	100	155.266
High	VFEIIDQDKSDFVEEDELKLFLQNFSAGAR	A5I874	E1UIZ8; A5I874	876.44	3502.74	-0.407761	-0.00035707	63.1317	92.5982
High	ALSEELDLALNDMTTL	A0A147AWH1; A0A0S7K258	Q4TI88; B9ELP6; Q4T142; H3C7I0; A0A060WSI3; H2TYG5; Q6IQD7; Q805C8; A0A147AWH1; A0A0S7K258; I3K0E5; A0A146YIN5; H2MCV5; M3ZZE4; G3Q402; H3DQ51; W5KTD3; G3Q3Z9	874.936	1748.86	1.4502	0.0012681	63.42	86.4457
High	LVQLPTTTDSFLYLGAEYMSTIR	P80429	B9U452; P80426; B5X2B3; B9U455; P80429	1310.17	2619.34	-0.00618763	-8.10375e-06	62.9893	93.2659
High	LVQLPTTTDSFLYLGAEYMSTIR	P80429	B9U452; P80426; B5X2B3; B9U455; P80429	873.784	2619.34	-0.151132	-0.000131955	19.5393	93.4423
High	LVQLPTTTDSFLYLGAEYMSTIR	P80429	B9U452; P80426; B5X2B3; B9U455; P80429	873.783	2619.33	-1.26962	-0.00110852	17.4813	93.4849
High	LVQLPTTTDSFLYLGAEYMSTIR	P80429	B9U452; P80426; B5X2B3; B9U455; P80429	873.784	2619.34	-0.500658	-0.000437131	14.7898	93.5267
High	EASGPINFTVFLTMFGEK	Q9DEA8; F8U029; I4BZJ0	I6R7V1; Q4JMD5; Q6PTC9; M4AVI3; Q90W42; D0EVE0; E3TEI4; H2LZ88; H3C3Q0; A0A0S7KSA9; Q9PUS9; W5KHS4; E9QG51; Q9IB37; Q9I9H9; E6ZH67; Q8JH57; A0A146YQC5; G3PKD0; H2T8N0; W5K709; A0A087Y6F1; A0A146YQ62; I3K077; I3JU24; O93409; Q4RWK9; A0A0F8CHZ2; Q9IB31; Q9IB28; H2T8M9; W5ZMW6; Q9IB34; W5KT30; Q90W50; Q9IB25; H2SHK0; G3NW33; A7XZM2; Q66I73; A0A0S7KTJ9; A0A060XEV5; C7EP36; I6U9W3; Q9DEA8; Q9I892; H2L…	994.495	1987.98	-0.333034	-0.000331033	80.2528	94.3331
High	EASGPINFTVFLTMFGEK	Q9DEA8; F8U029; I4BZJ0	I6R7V1; Q4JMD5; Q6PTC9; M4AVI3; Q90W42; D0EVE0; E3TEI4; H2LZ88; H3C3Q0; A0A0S7KSA9; Q9PUS9; W5KHS4; E9QG51; Q9IB37; Q9I9H9; E6ZH67; Q8JH57; A0A146YQC5; G3PKD0; H2T8N0; W5K709; A0A087Y6F1; A0A146YQ62; I3K077; I3JU24; O93409; Q4RWK9; A0A0F8CHZ2; Q9IB31; Q9IB28; H2T8M9; W5ZMW6; Q9IB34; W5KT30; Q90W50; Q9IB25; H2SHK0; G3NW33; A7XZM2; Q66I73; A0A0S7KTJ9; A0A060XEV5; C7EP36; I6U9W3; Q9DEA8; Q9I892; H2L…	994.492	1987.98	-3.21903	-0.00319969	68.7839	94.3771
High	EASGPINFTVFLTMFGEK	Q9DEA8; F8U029; I4BZJ0	I6R7V1; Q4JMD5; Q6PTC9; M4AVI3; Q90W42; D0EVE0; E3TEI4; H2LZ88; H3C3Q0; A0A0S7KSA9; Q9PUS9; W5KHS4; E9QG51; Q9IB37; Q9I9H9; E6ZH67; Q8JH57; A0A146YQC5; G3PKD0; H2T8N0; W5K709; A0A087Y6F1; A0A146YQ62; I3K077; I3JU24; O93409; Q4RWK9; A0A0F8CHZ2; Q9IB31; Q9IB28; H2T8M9; W5ZMW6; Q9IB34; W5KT30; Q90W50; Q9IB25; H2SHK0; G3NW33; A7XZM2; Q66I73; A0A0S7KTJ9; A0A060XEV5; C7EP36; I6U9W3; Q9DEA8; Q9I892; H2L…	994.496	1987.98	0.588028	0.000584495	35.3621	94.4529
High	EASGPINFTVFLTMFGEK	Q9DEA8; F8U029; I4BZJ0	I6R7V1; Q4JMD5; Q6PTC9; M4AVI3; Q90W42; D0EVE0; E3TEI4; H2LZ88; H3C3Q0; A0A0S7KSA9; Q9PUS9; W5KHS4; E9QG51; Q9IB37; Q9I9H9; E6ZH67; Q8JH57; A0A146YQC5; G3PKD0; H2T8N0; W5K709; A0A087Y6F1; A0A146YQ62; I3K077; I3JU24; O93409; Q4RWK9; A0A0F8CHZ2; Q9IB31; Q9IB28; H2T8M9; W5ZMW6; Q9IB34; W5KT30; Q90W50; Q9IB25; H2SHK0; G3NW33; A7XZM2; Q66I73; A0A0S7KTJ9; A0A060XEV5; C7EP36; I6U9W3; Q9DEA8; Q9I892; H2L…	994.496	1987.98	0.219603	0.000218284	35.0999	94.4843
High	LVQLPTTTDSFLYLGAEYMSTIR	P80429	B9U452; P80426; B5X2B3; B9U455; P80429	873.784	2619.34	0.40811	0.000356326	18.6486	93.3952
High	VFDKDGNGYISAAELR	A0A0F8AUE5	A0A146X7J1; B5XCM2; Q6R520; C1BHV5; H3DI88; A0A146R5I5; G3PGF2; A0A0P7ULQ0; G3P4Z6; Q20AK9; Q4JJ85; A0A060WZJ2; A0A147AAY6; A0A0F8ANM6; A0A060WVU0; X5DD20; I3IXY6; A0A060Y0G1; A0A0P7XGF1; F1C7D1; E3TFE6; C1BXP0; D2KX31; A0A060W7T8; A0A0P7XV73; A0A0P7UK75; H3CDX1; A0A060XPD1; A0A0P7UM01; A0A060WIX3; A0A060XT19; C1BIJ2; G3NDL7; Q7T3T2; A0A146TMD7; M9TJ14; P62150; Q4JJ74; A0A146NRJ8; Q4RN51; A2Q0R2;…	585.628	1754.87	-1.51101	-0.000883877	80.2811	56.8498
High	EELDEIIEEVDEDGSGTIDFEEFLVMMVR	A0A060WZV7	F5BZS8; B9EP57; H2SBN2; B9VJM4; H2L8Q7; A0A146V9Q1; A0A146P9L9; I3IZI3; H2L8Q9; A0A060WZV7; Q4RB38; A0A060YT85; H2L8R0; A0A146ZN37; G3NJM6	1130.18	3388.53	-1.88509	-0.00212923	100	155.239
High	VGLLHSQNTSLVNTK	Q98TQ5	Q98TQ5	537.633	1610.89	-0.0910057	-4.88666e-05	100	49.4639
High	VGLLHSQNTSLINTK	G9M5T1; T2HFG0; C0STL2; H3DR28	A8R0Q2; G3N9L2; H3CMX1; Q4RXH7; H3DB42; H3CNI4; H3BX59; G9M5T1; Q91520; C4TIP1; Q98TQ4; H2ULB1; T2HFG0; Q90339; Q4RXH2; H3DB41; I3KAL6; G3N9K5; A0A059PBU4; Q4SSC7; H2ULB2; Q4SSC6; C0STL2; Q5NTZ3; H2L9E3; Q9DFM1; H2L9D3; H3CNI3; O42352; A0A0F8CCG0; G3N9L9; A6NA52; H2ULB3; Q90338; A6NA53; H3DB44; A0A060X652; C0STL3; G9M5T2; E7FAD0; Q6QUR5; H3DR28; H3DB40; A0A060X4S9; A0A0P7TSX6	542.305	1624.9	-0.331017	-0.00017929	70.2172	51.1206
High	IQLVEEELDR	D6PVP3; H2LUJ8; Q8JIM7; A0A0F8AT58; Q5SPK6; A0A146W5Y8; A0A147AWH1; A0A0S7K258; A0A087XSB4; A0A147A2G3; H2SQV9; A0A087YEU9; A0A087YF71; P13104; H2MA79; A0A0F8CF82	H3CSI6; G3PBG3; A0A0S7FPU0; Q805C4; A0A146YIJ7; A0A0S7K1B6; A0A0R4INL7; A0A0R4IM99; A0A146P4T3; A0A0P7V399; Q805C3; A0A060X0I2; B9ELP6; K4PEK4; A0A060WJN0; H2RS11; D6PVP3; E3TC29; H2SQW0; Q1LXM2; W5UML0; A0A0S7FL43; A0A146MW79; A0A0S7JY28; H2LUJ8; I3KQJ0; Q805C7; Q805C9; Q4T142; Q803M1; A0A060WLJ6; A0A096M4B0; A0A146VDU0; G1FCF2; H3DDF1; A0A0P7WSD3; H2TYG2; B5X1U5; Q6P0W3; A0A060VSE4; H2RS10; H2M…	622.33	1243.65	-0.571005	-0.000355066	61.5131	51.1158
High	MLGQNPTREELDEIIEEVDEDGSGTIDFEEFLVMMVR	A0A060WZV7	F5BZS8; B9EP57; H2SBN2; B9VJM4; H2L8Q7; A0A146V9Q1; A0A146P9L9; I3IZI3; H2L8Q9; A0A060WZV7; Q4RB38; A0A060YT85; H2L8R0; A0A146ZN37; G3NJM6	1429.33	4285.98	-0.658231	-0.000940388	100	195.719
High	VGLLHSQNTSLINSK		Q789E7; Q90337	537.633	1610.89	-0.0910057	-4.88666e-05	100	49.4639
High	VGLLHSQNTSLLNSK	P87344	I3KU01; A0A060YNF5; P87344; B7SVK2; Q8JIV4	537.633	1610.89	-0.0910057	-4.88666e-05	100	49.4639
High	VGLLHSQNTSLLNSK	P87344	I3KU01; A0A060YNF5; P87344; B7SVK2; Q8JIV4	537.634	1610.89	0.363664	0.000195274	100	49.4195
High	VGLLHSQNTSLINSK		Q789E7; Q90337	537.634	1610.89	0.363664	0.000195274	100	49.4195
High	EELDEIIEEVDEDGSGTIDFEEFLVMMVR	A0A060WZV7	F5BZS8; B9EP57; H2SBN2; B9VJM4; H2L8Q7; A0A146V9Q1; A0A146P9L9; I3IZI3; H2L8Q9; A0A060WZV7; Q4RB38; A0A060YT85; H2L8R0; A0A146ZN37; G3NJM6	1130.18	3388.53	-2.31739	-0.00261751	100	173.926
High	EELDEIIEEVDEDGSGTIDFEEFLVMMVR	A0A060WZV7	F5BZS8; B9EP57; H2SBN2; B9VJM4; H2L8Q7; A0A146V9Q1; A0A146P9L9; I3IZI3; H2L8Q9; A0A060WZV7; Q4RB38; A0A060YT85; H2L8R0; A0A146ZN37; G3NJM6	1130.18	3388.53	-0.912429	-0.0010306	100	173.981
High	RIQLVEEELDR	D6PVP3; H2LUJ8; Q8JIM7; A0A0F8AT58; Q5SPK6; A0A146W5Y8; A0A147AWH1; A0A0S7K258; A0A087XSB4; A0A147A2G3; H2SQV9; A0A087YEU9; A0A087YF71; P13104; H2MA79; A0A0F8CF82	H3CSI6; G3PBG3; A0A0S7FPU0; Q805C4; A0A146YIJ7; A0A0S7K1B6; A0A0R4INL7; A0A0R4IM99; A0A146P4T3; A0A0P7V399; Q805C3; A0A060X0I2; B9ELP6; K4PEK4; A0A060WJN0; H2RS11; D6PVP3; E3TC29; H2SQW0; Q1LXM2; W5UML0; A0A0S7FL43; A0A146MW79; A0A0S7JY28; H2LUJ8; I3KQJ0; Q805C7; Q805C9; Q4T142; Q803M1; A0A060WLJ6; A0A096M4B0; A0A146VDU0; G1FCF2; H3DDF1; A0A0P7WSD3; H2TYG2; B5X1U5; Q6P0W3; A0A060VSE4; H2RS10; H2M…	700.38	1399.75	-0.271949	-0.000190331	100	49.2666
High	RIQLVEEELDR	D6PVP3; H2LUJ8; Q8JIM7; A0A0F8AT58; Q5SPK6; A0A146W5Y8; A0A147AWH1; A0A0S7K258; A0A087XSB4; A0A147A2G3; H2SQV9; A0A087YEU9; A0A087YF71; P13104; H2MA79; A0A0F8CF82	H3CSI6; G3PBG3; A0A0S7FPU0; Q805C4; A0A146YIJ7; A0A0S7K1B6; A0A0R4INL7; A0A0R4IM99; A0A146P4T3; A0A0P7V399; Q805C3; A0A060X0I2; B9ELP6; K4PEK4; A0A060WJN0; H2RS11; D6PVP3; E3TC29; H2SQW0; Q1LXM2; W5UML0; A0A0S7FL43; A0A146MW79; A0A0S7JY28; H2LUJ8; I3KQJ0; Q805C7; Q805C9; Q4T142; Q803M1; A0A060WLJ6; A0A096M4B0; A0A146VDU0; G1FCF2; H3DDF1; A0A0P7WSD3; H2TYG2; B5X1U5; Q6P0W3; A0A060VSE4; H2RS10; H2M…	700.381	1399.75	0.0768843	5.38095e-05	100	49.2202
High	EELDEIIEEVDEDGSGTIDFEEFLVMMVR	A0A060WZV7	F5BZS8; B9EP57; H2SBN2; B9VJM4; H2L8Q7; A0A146V9Q1; A0A146P9L9; I3IZI3; H2L8Q9; A0A060WZV7; Q4RB38; A0A060YT85; H2L8R0; A0A146ZN37; G3NJM6	1130.18	3388.54	1.35712	0.00153288	100	174.243
High	EELDEIIEEVDEDGSGTIDFEEFLVMMVR	A0A060WZV7	F5BZS8; B9EP57; H2SBN2; B9VJM4; H2L8Q7; A0A146V9Q1; A0A146P9L9; I3IZI3; H2L8Q9; A0A060WZV7; Q4RB38; A0A060YT85; H2L8R0; A0A146ZN37; G3NJM6	1130.18	3388.52	-3.61427	-0.00408236	100	176.041
High	MLGQNPTREELDEIIEEVDEDGSGTIDFEEFLVMMVR	A0A060WZV7	F5BZS8; B9EP57; H2SBN2; B9VJM4; H2L8Q7; A0A146V9Q1; A0A146P9L9; I3IZI3; H2L8Q9; A0A060WZV7; Q4RB38; A0A060YT85; H2L8R0; A0A146ZN37; G3NJM6	1429.34	4286	5.15195	0.00736039	100	192.663
High	SGFLEEDELK		P86432	583.782	1166.56	-0.538032	-0.000313823	100	47.8879
High	EELDEIIEEVDEDGSGTIDFEEFLVMMVR	A0A060WZV7	F5BZS8; B9EP57; H2SBN2; B9VJM4; H2L8Q7; A0A146V9Q1; A0A146P9L9; I3IZI3; H2L8Q9; A0A060WZV7; Q4RB38; A0A060YT85; H2L8R0; A0A146ZN37; G3NJM6	1130.18	3388.53	0.0602336	6.80345e-05	100	177.043
High	EELDEIIEEVDEDGSGTIDFEEFLVMMVR	A0A060WZV7	F5BZS8; B9EP57; H2SBN2; B9VJM4; H2L8Q7; A0A146V9Q1; A0A146P9L9; I3IZI3; H2L8Q9; A0A060WZV7; Q4RB38; A0A060YT85; H2L8R0; A0A146ZN37; G3NJM6	1130.18	3388.54	1.24904	0.00141081	100	177.11
High	MLGQNPTREELDEIIEEVDEDGSGTIDFEEFLVMMVR	A0A060WZV7	F5BZS8; B9EP57; H2SBN2; B9VJM4; H2L8Q7; A0A146V9Q1; A0A146P9L9; I3IZI3; H2L8Q9; A0A060WZV7; Q4RB38; A0A060YT85; H2L8R0; A0A146ZN37; G3NJM6	1429.33	4285.97	-2.02533	-0.00289351	100	177.415
High	NLTEEMASQDESVAK	B1Q382; P87344; B1Q385	B1Q382; O93498; B1Q383; P87344; B1Q385; B1Q384; A0A060XZG1	826.376	1651.74	-2.1333	-0.00176184	100	46.9573
High	EELDEIIEEVDEDGSGTIDFEEFLVMMVR	A0A060WZV7	F5BZS8; B9EP57; H2SBN2; B9VJM4; H2L8Q7; A0A146V9Q1; A0A146P9L9; I3IZI3; H2L8Q9; A0A060WZV7; Q4RB38; A0A060YT85; H2L8R0; A0A146ZN37; G3NJM6	1130.18	3388.53	-2.42546	-0.00273958	100	192.742
High	IEDEQSLGAQLQK	B1Q382; G9M5T1; A0A087XQZ5; T2HFG0; B3DJM6; H2UN88; C0STL2; A0A0F8C3K6; P87344; Q05K06; B1Q385; A0A060Y971; Q98TQ5; A0A0F8CGF3	A8R0Q2; Q05K05; H2LNV3; B1Q382; Q789E7; F1R6C7; H3CNF0; Q90YF6; C4TIP2; A0A147A0M4; Q05K11; C4TIP3; M3ZPQ1; A8R0Q7; B1PF34; A0A146W7Q2; A0A0F8BDK2; A0A146W4J3; G9M5T1; A0A0F8CX77; A0A060Y5W1; A0A087XQZ5; Q90337; Q508P7; A4GWV4; T2HFG0; I3IZY8; Q90339; Q9IBD7; H2LPK6; Q05K07; G0YU48; Q6SNT2; A0A087X5F9; A0A060YNF5; B8A561; B3DJM6; Q05K09; Q05K08; A0A146W530; A0A146W7Q9; H2LNV4; W5L9M3; H2LP40; A0A…	729.875	1458.74	-0.0887054	-6.46992e-05	100	44.8549
High	IEDEQSLGAQLQK	B1Q382; G9M5T1; A0A087XQZ5; T2HFG0; B3DJM6; H2UN88; C0STL2; A0A0F8C3K6; P87344; Q05K06; B1Q385; A0A060Y971; Q98TQ5; A0A0F8CGF3	A8R0Q2; Q05K05; H2LNV3; B1Q382; Q789E7; F1R6C7; H3CNF0; Q90YF6; C4TIP2; A0A147A0M4; Q05K11; C4TIP3; M3ZPQ1; A8R0Q7; B1PF34; A0A146W7Q2; A0A0F8BDK2; A0A146W4J3; G9M5T1; A0A0F8CX77; A0A060Y5W1; A0A087XQZ5; Q90337; Q508P7; A4GWV4; T2HFG0; I3IZY8; Q90339; Q9IBD7; H2LPK6; Q05K07; G0YU48; Q6SNT2; A0A087X5F9; A0A060YNF5; B8A561; B3DJM6; Q05K09; Q05K08; A0A146W530; A0A146W7Q9; H2LNV4; W5L9M3; H2LP40; A0A…	729.875	1458.74	-0.75816	-0.00055298	100	44.8031
High	MLGQNPTREELDEIIEEVDEDGSGTIDFEEFLVMMVR	A0A060WZV7	F5BZS8; B9EP57; H2SBN2; B9VJM4; H2L8Q7; A0A146V9Q1; A0A146P9L9; I3IZI3; H2L8Q9; A0A060WZV7; Q4RB38; A0A060YT85; H2L8R0; A0A146ZN37; G3NJM6	1429.33	4285.97	-2.62344	-0.00374801	100	177.442
High	IEDEQSLGAQLQK	B1Q382; G9M5T1; A0A087XQZ5; T2HFG0; B3DJM6; H2UN88; C0STL2; A0A0F8C3K6; P87344; Q05K06; B1Q385; A0A060Y971; Q98TQ5; A0A0F8CGF3	A8R0Q2; Q05K05; H2LNV3; B1Q382; Q789E7; F1R6C7; H3CNF0; Q90YF6; C4TIP2; A0A147A0M4; Q05K11; C4TIP3; M3ZPQ1; A8R0Q7; B1PF34; A0A146W7Q2; A0A0F8BDK2; A0A146W4J3; G9M5T1; A0A0F8CX77; A0A060Y5W1; A0A087XQZ5; Q90337; Q508P7; A4GWV4; T2HFG0; I3IZY8; Q90339; Q9IBD7; H2LPK6; Q05K07; G0YU48; Q6SNT2; A0A087X5F9; A0A060YNF5; B8A561; B3DJM6; Q05K09; Q05K08; A0A146W530; A0A146W7Q9; H2LNV4; W5L9M3; H2LP40; A0A…	729.874	1458.74	-1.26025	-0.000919191	100	44.4919
High	LQEAEEQIEAVNSK	B1Q382; B3DJM6; W5L2L4; P87344; B1Q385; D6PVQ0; Q98TQ5; A0A0F8CGF3	B1Q382; F1R6C7; C4TIP2; H3CE06; C4TIP3; Q2PMW9; Q4T6M5; H2SKR3; H2SKR2; Q508P7; B8A561; B3DJM6; W5L2L4; A0A0F8ANR8; G3NES6; G3NEV3; Q90ZE5; Q6IQX1; H2S271; Q6QUR8; B1Q383; G3NF36; A0A0F8CAS0; A4PDX4; A2BGX6; G3NEW0; A0A0F8ASB4; I3JYT9; P87344; I3JT59; H2SKR0; B1Q385; Q2HX57; D6PVQ0; A4PDX5; Q4STF9; F1Q5K4; H2MWE2; Q98TQ6; B1Q384; Q2HX58; G3NF22; H3CMS1; A0A0F8B949; B8A568; Q98TQ5; A0A0F8CGF3; B7S…	794.397	1587.79	0.00138617	1.10047e-06	100	44.4338
High	LQEAEEQIEAVNSK	B1Q382; B3DJM6; W5L2L4; P87344; B1Q385; D6PVQ0; Q98TQ5; A0A0F8CGF3	B1Q382; F1R6C7; C4TIP2; H3CE06; C4TIP3; Q2PMW9; Q4T6M5; H2SKR3; H2SKR2; Q508P7; B8A561; B3DJM6; W5L2L4; A0A0F8ANR8; G3NES6; G3NEV3; Q90ZE5; Q6IQX1; H2S271; Q6QUR8; B1Q383; G3NF36; A0A0F8CAS0; A4PDX4; A2BGX6; G3NEW0; A0A0F8ASB4; I3JYT9; P87344; I3JT59; H2SKR0; B1Q385; Q2HX57; D6PVQ0; A4PDX5; Q4STF9; F1Q5K4; H2MWE2; Q98TQ6; B1Q384; Q2HX58; G3NF22; H3CMS1; A0A0F8B949; B8A568; Q98TQ5; A0A0F8CGF3; B7S…	794.397	1587.79	0.539552	0.000428347	100	44.3876
High	LQEAEEQIEAVNSK	B1Q382; B3DJM6; W5L2L4; P87344; B1Q385; D6PVQ0; Q98TQ5; A0A0F8CGF3	B1Q382; F1R6C7; C4TIP2; H3CE06; C4TIP3; Q2PMW9; Q4T6M5; H2SKR3; H2SKR2; Q508P7; B8A561; B3DJM6; W5L2L4; A0A0F8ANR8; G3NES6; G3NEV3; Q90ZE5; Q6IQX1; H2S271; Q6QUR8; B1Q383; G3NF36; A0A0F8CAS0; A4PDX4; A2BGX6; G3NEW0; A0A0F8ASB4; I3JYT9; P87344; I3JT59; H2SKR0; B1Q385; Q2HX57; D6PVQ0; A4PDX5; Q4STF9; F1Q5K4; H2MWE2; Q98TQ6; B1Q384; Q2HX58; G3NF22; H3CMS1; A0A0F8B949; B8A568; Q98TQ5; A0A0F8CGF3; B7S…	794.397	1587.79	0.616433	0.000489382	100	44.3482
High	LQEAEEQIEAVNSK	B1Q382; B3DJM6; W5L2L4; P87344; B1Q385; D6PVQ0; Q98TQ5; A0A0F8CGF3	B1Q382; F1R6C7; C4TIP2; H3CE06; C4TIP3; Q2PMW9; Q4T6M5; H2SKR3; H2SKR2; Q508P7; B8A561; B3DJM6; W5L2L4; A0A0F8ANR8; G3NES6; G3NEV3; Q90ZE5; Q6IQX1; H2S271; Q6QUR8; B1Q383; G3NF36; A0A0F8CAS0; A4PDX4; A2BGX6; G3NEW0; A0A0F8ASB4; I3JYT9; P87344; I3JT59; H2SKR0; B1Q385; Q2HX57; D6PVQ0; A4PDX5; Q4STF9; F1Q5K4; H2MWE2; Q98TQ6; B1Q384; Q2HX58; G3NF22; H3CMS1; A0A0F8B949; B8A568; Q98TQ5; A0A0F8CGF3; B7S…	794.396	1587.78	-0.767422	-0.000609251	100	44.3047
High	SGFIEEDELK	A5I873; H2M0U7; A0A0P7XIM1; P02621; H3D5S1; P56503	B6UV98; Q7ZT36; Q8AYB3; P86742; P86758; A0A060YVV4; D3YPP4; E0WD92; D3YPP6; A0A060X5F1; E0WD99; W5ZLY7; P86740; Q6ITV0; P86775; Q3C2C4; B5TTU7; P86771; C3UVG3; I3J1U3; P86743; P05941; Q5IRB2; D3YPP1; Q8UUS2; E3TBW7; W5KKR2; A5YVT7; Q91483; P09227; I3KV10; C6GKU3; I3KV11; A5I873; C0LEL6; W5ZLY9; C0LEL8; H2M0U7; Q90YL0; C0LEL4; A0A0P7XIM1; P02621; W5KKQ1; R9R015; P86753; D2KQG1; G8GWA2; Q4S4I4; Q6B…	583.782	1166.56	-0.538032	-0.000313823	100	47.8879
High	MLGQNPTREELDEIIEEVDEDGSGTIDFEEFLVMMVR	A0A060WZV7	F5BZS8; B9EP57; H2SBN2; B9VJM4; H2L8Q7; A0A146V9Q1; A0A146P9L9; I3IZI3; H2L8Q9; A0A060WZV7; Q4RB38; A0A060YT85; H2L8R0; A0A146ZN37; G3NJM6	1429.33	4285.98	0.281652	0.000402385	100	178.251
High	IQLVEEELDR	D6PVP3; H2LUJ8; Q8JIM7; A0A0F8AT58; Q5SPK6; A0A146W5Y8; A0A147AWH1; A0A0S7K258; A0A087XSB4; A0A147A2G3; H2SQV9; A0A087YEU9; A0A087YF71; P13104; H2MA79; A0A0F8CF82	H3CSI6; G3PBG3; A0A0S7FPU0; Q805C4; A0A146YIJ7; A0A0S7K1B6; A0A0R4INL7; A0A0R4IM99; A0A146P4T3; A0A0P7V399; Q805C3; A0A060X0I2; B9ELP6; K4PEK4; A0A060WJN0; H2RS11; D6PVP3; E3TC29; H2SQW0; Q1LXM2; W5UML0; A0A0S7FL43; A0A146MW79; A0A0S7JY28; H2LUJ8; I3KQJ0; Q805C7; Q805C9; Q4T142; Q803M1; A0A060WLJ6; A0A096M4B0; A0A146VDU0; G1FCF2; H3DDF1; A0A0P7WSD3; H2TYG2; B5X1U5; Q6P0W3; A0A060VSE4; H2RS10; H2M…	622.33	1243.65	-0.47285	-0.000294031	77.0301	51.1644
High	VGLLHSQNTSLINTK	G9M5T1; T2HFG0; C0STL2; H3DR28	A8R0Q2; G3N9L2; H3CMX1; Q4RXH7; H3DB42; H3CNI4; H3BX59; G9M5T1; Q91520; C4TIP1; Q98TQ4; H2ULB1; T2HFG0; Q90339; Q4RXH2; H3DB41; I3KAL6; G3N9K5; A0A059PBU4; Q4SSC7; H2ULB2; Q4SSC6; C0STL2; Q5NTZ3; H2L9E3; Q9DFM1; H2L9D3; H3CNI3; O42352; A0A0F8CCG0; G3N9L9; A6NA52; H2ULB3; Q90338; A6NA53; H3DB44; A0A060X652; C0STL3; G9M5T2; E7FAD0; Q6QUR5; H3DR28; H3DB40; A0A060X4S9; A0A0P7TSX6	542.305	1624.9	-0.443705	-0.000240325	100	51.1755
High	LKGTEDELDKYSEALK	D6PVP3; H2LUJ8; Q8AV86; A0A0F8AT58; A0A146W5Y8; A0A0S7K258; A0A147A2G3; A0A087YF71; E3TFQ0; A0A0F8CF82	A0A0S7K1B6; K4PEK4; D6PVP3; H2LUJ8; G1FCF2; Q6P0W3; A0A060WR17; Q8AV86; G3P8Z9; F8U085; G3N8Q3; X2J4M2; A0A146ZYU7; A0A146W5S1; A0A146W5R6; F6NVA3; A5WW36; A0A0F8AT58; I3KDN0; A0A147AVZ3; E7FBZ3; G3P8Z5; B9EMY1; A0A146NCI0; Q91490; A0A146W5Y8; A0A146W2Z9; A0A0S7K258; M4AQP3; A0A147A2G3; A0A087YF71; A0A0S7MHR3; I3ISQ1; A0A087XA45; Q805C6; A0A0P7WKP3; Q76CT4; Q7ZVK9; A0A0P7YL18; Q9DEB7; A0A146W620;…	613.65	1838.94	-0.760134	-0.000465947	100	53.0311
High	TIDDLEDELYAQK	D6PVP3; Q8AV86; Q8JIM7; Q5SPK6; H2SQV9; A0A087YEU9; A0A087YF71; P13104; A0A0F8CF82	K4PEK4; A0A060WJN0; D6PVP3; H2SQW0; A0A060WLJ6; H3DQ99; G1FCF2; Q6P0W3; Q8AV86; Q5SPK5; W5K5N7; Q8JIM7; H2M5M4; X2J4M2; I3J2Q1; A0A0P7TWT7; W5KS79; A0A147AVZ3; Q4RB49; A0A146NCI0; Q5SPK6; A0A060WRJ2; Q4SAI3; A0A0S7FXE9; Q91490; I3JVV2; W5JYT8; H2SQV9; A0A087YEU9; A0A087YF71; A0A146WFT2; A0A146YH85; A0A060W8G0; P13104; Q91472; Q805C6; Q76CT4; Q9DEB7; G3PVL1; B9V2W9; A0A060X9W2; A0A0F8CF82; F2WR17;…	776.873	1552.74	1.02813	0.000798211	57.0434	52.9874
High	TIDDLEDELYAQK	D6PVP3; Q8AV86; Q8JIM7; Q5SPK6; H2SQV9; A0A087YEU9; A0A087YF71; P13104; A0A0F8CF82	K4PEK4; A0A060WJN0; D6PVP3; H2SQW0; A0A060WLJ6; H3DQ99; G1FCF2; Q6P0W3; Q8AV86; Q5SPK5; W5K5N7; Q8JIM7; H2M5M4; X2J4M2; I3J2Q1; A0A0P7TWT7; W5KS79; A0A147AVZ3; Q4RB49; A0A146NCI0; Q5SPK6; A0A060WRJ2; Q4SAI3; A0A0S7FXE9; Q91490; I3JVV2; W5JYT8; H2SQV9; A0A087YEU9; A0A087YF71; A0A146WFT2; A0A146YH85; A0A060W8G0; P13104; Q91472; Q805C6; Q76CT4; Q9DEB7; G3PVL1; B9V2W9; A0A060X9W2; A0A0F8CF82; F2WR17;…	776.873	1552.74	0.241971	0.000187859	55.5627	52.9264
High	KLVIIEGDLER	D6PVP3; A0A146W5Y8; A0A0F8CF82	H3CSI6; A0A0S7K1B6; A0A0P7V399; K4PEK4; A0A060WJN0; D6PVP3; W5UML0; A0A146MW79; G1FCF2; A0A0P7WSD3; G3P8Z9; F8U085; C0H9C0; X2J4M2; A0A146ZYU7; A0A146W5S1; Q805D2; I3J2Q1; A0A0P7TWT7; A0A146W5R6; I3KDN0; G3P8Z5; Q8JIM8; Q91490; A0A146W5Y8; A0A146W2Z9; H3CEU1; W5KAS6; A0A146MYM3; A0A087XA45; Q805D1; Q76CT4; A0A146P5S8; Q9DEB7; A0A146W620; A0A146MVQ5; B9V2W9; A0A0F8CF82; H2TF14; Q4SM36; H3C493	428.923	1284.75	0.778355	0.000333331	100	52.8316
High	KLVILEGDLER	A0A147AWH1; A0A0S7K258; A0A087XSB4	A0A0S7FPU0; A0A146YIJ7; Q4TI88; B9ELP6; A0A0S7FL43; Q805C7; Q4T142; H2TYG2; B5X1U5; H3C7I0; A0A060WSI3; A0A087X6Z2; H2TYG5; A0A096LSJ0; G3Q408; A0A146WA78; Q805C8; H2MRC9; A0A146WCY3; A0A147A1D8; H2TYG4; A0A146WD86; A0A096M9U2; A0A147AWH1; A0A096MBU4; A0A0S7K258; M3ZMF1; A0A087XSB4; A0A146YIN5; H2MCV5; H3CHP2; M3ZEK9; M3ZZE4; G3Q407; G8G913; A0A146YII9; G3Q402; H3DQ51; W5KTD3; A0A146YIL1; G3Q3Z9;…	428.923	1284.75	0.778355	0.000333331	100	52.8316
High	TIDDLEDELYAQK	D6PVP3; Q8AV86; Q8JIM7; Q5SPK6; H2SQV9; A0A087YEU9; A0A087YF71; P13104; A0A0F8CF82	K4PEK4; A0A060WJN0; D6PVP3; H2SQW0; A0A060WLJ6; H3DQ99; G1FCF2; Q6P0W3; Q8AV86; Q5SPK5; W5K5N7; Q8JIM7; H2M5M4; X2J4M2; I3J2Q1; A0A0P7TWT7; W5KS79; A0A147AVZ3; Q4RB49; A0A146NCI0; Q5SPK6; A0A060WRJ2; Q4SAI3; A0A0S7FXE9; Q91490; I3JVV2; W5JYT8; H2SQV9; A0A087YEU9; A0A087YF71; A0A146WFT2; A0A146YH85; A0A060W8G0; P13104; Q91472; Q805C6; Q76CT4; Q9DEB7; G3PVL1; B9V2W9; A0A060X9W2; A0A0F8CF82; F2WR17;…	776.873	1552.74	0.320588	0.000248894	100	52.8203
High	KLVILEGDLER	A0A147AWH1; A0A0S7K258; A0A087XSB4	A0A0S7FPU0; A0A146YIJ7; Q4TI88; B9ELP6; A0A0S7FL43; Q805C7; Q4T142; H2TYG2; B5X1U5; H3C7I0; A0A060WSI3; A0A087X6Z2; H2TYG5; A0A096LSJ0; G3Q408; A0A146WA78; Q805C8; H2MRC9; A0A146WCY3; A0A147A1D8; H2TYG4; A0A146WD86; A0A096M9U2; A0A147AWH1; A0A096MBU4; A0A0S7K258; M3ZMF1; A0A087XSB4; A0A146YIN5; H2MCV5; H3CHP2; M3ZEK9; M3ZZE4; G3Q407; G8G913; A0A146YII9; G3Q402; H3DQ51; W5KTD3; A0A146YIL1; G3Q3Z9;…	428.922	1284.75	-0.646865	-0.000277021	100	52.7822
High	KLVIIEGDLER	D6PVP3; A0A146W5Y8; A0A0F8CF82	H3CSI6; A0A0S7K1B6; A0A0P7V399; K4PEK4; A0A060WJN0; D6PVP3; W5UML0; A0A146MW79; G1FCF2; A0A0P7WSD3; G3P8Z9; F8U085; C0H9C0; X2J4M2; A0A146ZYU7; A0A146W5S1; Q805D2; I3J2Q1; A0A0P7TWT7; A0A146W5R6; I3KDN0; G3P8Z5; Q8JIM8; Q91490; A0A146W5Y8; A0A146W2Z9; H3CEU1; W5KAS6; A0A146MYM3; A0A087XA45; Q805D1; Q76CT4; A0A146P5S8; Q9DEB7; A0A146W620; A0A146MVQ5; B9V2W9; A0A0F8CF82; H2TF14; Q4SM36; H3C493	428.922	1284.75	-0.646865	-0.000277021	100	52.7822
High	IWHHTFYNELR	Q4SVI6	F4Y565; A0A146S6Z1; A9QUS4; M3ZZR9; A0A0G4AKU0; A0A0P7V8D8; C0LJU8; A3F5U9; D0V739; A0A166T9B6; Q9DDW1; B5U150; P53486; B5SU07; Q0PVE1; Q9PTU4; I3K9Y0; A0A060YV63; Q3B727; F2YI31; D6BL53; H9CDH1; Q6S3E8; H3DJ95; Q7T2J3; S4SF00; M4Q1U6; Q8UVT9; G5CBT1; Q5IGP9; A0A024DD09; A0A0P7ZAK3; Q9PSV5; W5KBE9; F1QC15; H2MSI7; Q4RG96; G0XNZ1; D6NLA5; E6Y295; A0SIJ6; Q8JIZ5; Q9DF40; S4SF40; A0A0P7UGX4; A0A060W…	505.921	1515.75	-0.488906	-0.00024702	100	52.0258
High	KLVIIESDLER	H2LUJ8; Q8AV86; Q8JIM7; A0A147A2G3; H2SQV9; A0A087YEU9; H2MA79	A0A060X0I2; H2SQW0; H2LUJ8; Q805C9; A0A096M4B0; Q8AV86; Q8JIM7; G3PVL2; Q805D0; H2SQV7; H2MA80; Q4SAI3; A0A147A2G3; H2SQV9; A0A087YEU9; A0A146WFT2; A0A060W8G0; B5X4E8; Q91472; M4AS27; H3BYP9; G3PVL1; H2MA79; H2SQV8; A0A146WDB4; H3C0I1; G3PVK9	438.926	1314.76	0.0367899	1.61233e-05	27.9112	51.902
High	IWHHTFYNELR	Q4SVI6	F4Y565; A0A146S6Z1; A9QUS4; M3ZZR9; A0A0G4AKU0; A0A0P7V8D8; C0LJU8; A3F5U9; D0V739; A0A166T9B6; Q9DDW1; B5U150; P53486; B5SU07; Q0PVE1; Q9PTU4; I3K9Y0; A0A060YV63; Q3B727; F2YI31; D6BL53; H9CDH1; Q6S3E8; H3DJ95; Q7T2J3; S4SF00; M4Q1U6; Q8UVT9; G5CBT1; Q5IGP9; A0A024DD09; A0A0P7ZAK3; Q9PSV5; W5KBE9; F1QC15; H2MSI7; Q4RG96; G0XNZ1; D6NLA5; E6Y295; A0SIJ6; Q8JIZ5; Q9DF40; S4SF40; A0A0P7UGX4; A0A060W…	505.92	1515.75	-2.18013	-0.00110151	100	51.8738
High	KLVIIESDLER	H2LUJ8; Q8AV86; Q8JIM7; A0A147A2G3; H2SQV9; A0A087YEU9; H2MA79	A0A060X0I2; H2SQW0; H2LUJ8; Q805C9; A0A096M4B0; Q8AV86; Q8JIM7; G3PVL2; Q805D0; H2SQV7; H2MA80; Q4SAI3; A0A147A2G3; H2SQV9; A0A087YEU9; A0A146WFT2; A0A060W8G0; B5X4E8; Q91472; M4AS27; H3BYP9; G3PVL1; H2MA79; H2SQV8; A0A146WDB4; H3C0I1; G3PVK9	438.926	1314.76	-0.381017	-0.000166982	35.1998	51.8579
High	KLVIIESDLER	H2LUJ8; Q8AV86; Q8JIM7; A0A147A2G3; H2SQV9; A0A087YEU9; H2MA79	A0A060X0I2; H2SQW0; H2LUJ8; Q805C9; A0A096M4B0; Q8AV86; Q8JIM7; G3PVL2; Q805D0; H2SQV7; H2MA80; Q4SAI3; A0A147A2G3; H2SQV9; A0A087YEU9; A0A146WFT2; A0A060W8G0; B5X4E8; Q91472; M4AS27; H3BYP9; G3PVL1; H2MA79; H2SQV8; A0A146WDB4; H3C0I1; G3PVK9	438.925	1314.76	-0.659554	-0.000289052	20.8235	51.8084
High	VGLLHSQNTSLLNTK	B1Q382; A0A087XQZ5; B3DJM6; H2UN88; Q8JIP5; A0A0F8C3K6; Q05K06; B1Q385; D6PVQ0; A0A060Y971	H3CMS0; H2LNV3; B1Q382; F1R6C7; F4ZQR5; A0A147A0M4; Q05K11; M3ZPQ1; A0A060YBV0; A0A0S7JAN2; Q91208; A0A060Y5W1; A0A087XQZ5; A0A060XRS6; Q508P7; I3IZY8; Q9IBD7; Q05K07; A0A0S7J8H5; A0A087X5F9; B8A561; B3DJM6; Q05K09; Q05K08; A0A146W530; A0A146W7Q9; A0A060YKV8; A0A0S7J8I5; Q90ZE5; A0A060XTA3; A0A060XSP7; H2UN88; Q6IQX1; E1CHP3; B1Q383; I3IZU1; A0A146W4S2; Q8JIP5; A0A146ZZE3; A0A146ZZF8; A0A0F8C3K6;…	542.305	1624.9	-0.443705	-0.000240325	100	51.1755
High	KLVIIESDLER	H2LUJ8; Q8AV86; Q8JIM7; A0A147A2G3; H2SQV9; A0A087YEU9; H2MA79	A0A060X0I2; H2SQW0; H2LUJ8; Q805C9; A0A096M4B0; Q8AV86; Q8JIM7; G3PVL2; Q805D0; H2SQV7; H2MA80; Q4SAI3; A0A147A2G3; H2SQV9; A0A087YEU9; A0A146WFT2; A0A060W8G0; B5X4E8; Q91472; M4AS27; H3BYP9; G3PVL1; H2MA79; H2SQV8; A0A146WDB4; H3C0I1; G3PVK9	438.925	1314.76	-1.07736	-0.000472158	23.5877	51.7586
High	EELDEIIEEVDEDGSGTIDFEEFLVMMVR	A0A060WZV7	F5BZS8; B9EP57; H2SBN2; B9VJM4; H2L8Q7; A0A146V9Q1; A0A146P9L9; I3IZI3; H2L8Q9; A0A060WZV7; Q4RB38; A0A060YT85; H2L8R0; A0A146ZN37; G3NJM6	1130.18	3388.54	0.600601	0.000678386	100	170.867
High	MELQEMQLK		W5KTD3; A0A0P7UUX9	575.285	1149.56	-1.3679	-0.000786245	100	51.6155
High	MEIQEMQLK	A0A0F8AT58; A0A147AWH1; A0A087XSB4	G3PBG3; A0A0S7FPU0; Q805C4; A0A146YIJ7; A0A0R4INL7; A0A0R4IM99; A0A146P4T3; Q4TI88; B9ELP6; H2RS11; Q1LXM2; A0A0E9X8H8; I3KQJ0; Q805C7; Q4T142; A0A146VDU0; H3DDF1; H2TYG2; B5X1U5; H2RS10; H2MUU8; H3C7I0; Q7T3F0; A0A060WSI3; I3J232; Q805C5; H2TYG5; A0A096LSJ0; Q6IQD7; Q1LXM1; G3Q408; Q805C8; H2MRC9; H2RS09; A0A0F8AT58; A0A147A1D8; A0A0R4IMN8; W5L7Y3; H2TYG4; B9EMY1; B5X2S2; I3J233; G3PBG1; H3BZ06;…	575.285	1149.56	-1.3679	-0.000786245	100	51.6155
High	LVIVEGELER	Q5SPK6; A0A087YF71; P13104; E3TFQ0	E3TC29; Q2I189; Q803M1; Q6P0W3; Q5SPK5; H2M5M4; F6NVA3; W5KS79; A0A147AVZ3; F6P435; E7FBZ3; A0A146NCI0; Q5SPK6; A0A0S7FXE9; I3JVV2; Q6NYQ0; M4AQP3; W5JYT8; A0A087YF71; A0A146YH85; A7E2K1; H2MYN6; P13104; I3ISQ1; Q7ZVK9; E3TFQ0; W5JZC9; H2MYN5	578.832	1156.66	-0.476114	-0.00027535	100	51.5573
High	LVIVEGELER	Q5SPK6; A0A087YF71; P13104; E3TFQ0	E3TC29; Q2I189; Q803M1; Q6P0W3; Q5SPK5; H2M5M4; F6NVA3; W5KS79; A0A147AVZ3; F6P435; E7FBZ3; A0A146NCI0; Q5SPK6; A0A0S7FXE9; I3JVV2; Q6NYQ0; M4AQP3; W5JYT8; A0A087YF71; A0A146YH85; A7E2K1; H2MYN6; P13104; I3ISQ1; Q7ZVK9; E3TFQ0; W5JZC9; H2MYN5	578.832	1156.66	-0.792725	-0.000458456	100	51.5117
High	MLGQNPTREELDEIIEEVDEDGSGTIDFEEFLVMMVR	A0A060WZV7	F5BZS8; B9EP57; H2SBN2; B9VJM4; H2L8Q7; A0A146V9Q1; A0A146P9L9; I3IZI3; H2L8Q9; A0A060WZV7; Q4RB38; A0A060YT85; H2L8R0; A0A146ZN37; G3NJM6	1072.25	4285.99	1.48897	0.00159542	100	171.165
High	MLGQNPTREELDEIIEEVDEDGSGTIDFEEFLVMMVR	A0A060WZV7	F5BZS8; B9EP57; H2SBN2; B9VJM4; H2L8Q7; A0A146V9Q1; A0A146P9L9; I3IZI3; H2L8Q9; A0A060WZV7; Q4RB38; A0A060YT85; H2L8R0; A0A146ZN37; G3NJM6	1072.25	4285.99	1.71682	0.00183956	100	171.204
High	LVIVEGELER	Q5SPK6; A0A087YF71; P13104; E3TFQ0	E3TC29; Q2I189; Q803M1; Q6P0W3; Q5SPK5; H2M5M4; F6NVA3; W5KS79; A0A147AVZ3; F6P435; E7FBZ3; A0A146NCI0; Q5SPK6; A0A0S7FXE9; I3JVV2; Q6NYQ0; M4AQP3; W5JYT8; A0A087YF71; A0A146YH85; A7E2K1; H2MYN6; P13104; I3ISQ1; Q7ZVK9; E3TFQ0; W5JZC9; H2MYN5	578.832	1156.66	-1.21487	-0.000702596	100	51.4547
High	MLGQNPTREELDEIIEEVDEDGSGTIDFEEFLVMMVR	A0A060WZV7	F5BZS8; B9EP57; H2SBN2; B9VJM4; H2L8Q7; A0A146V9Q1; A0A146P9L9; I3IZI3; H2L8Q9; A0A060WZV7; Q4RB38; A0A060YT85; H2L8R0; A0A146ZN37; G3NJM6	1429.33	4285.98	0.537984	0.000768596	100	171.231
High	IQLVEEELDR	D6PVP3; H2LUJ8; Q8JIM7; A0A0F8AT58; Q5SPK6; A0A146W5Y8; A0A147AWH1; A0A0S7K258; A0A087XSB4; A0A147A2G3; H2SQV9; A0A087YEU9; A0A087YF71; P13104; H2MA79; A0A0F8CF82	H3CSI6; G3PBG3; A0A0S7FPU0; Q805C4; A0A146YIJ7; A0A0S7K1B6; A0A0R4INL7; A0A0R4IM99; A0A146P4T3; A0A0P7V399; Q805C3; A0A060X0I2; B9ELP6; K4PEK4; A0A060WJN0; H2RS11; D6PVP3; E3TC29; H2SQW0; Q1LXM2; W5UML0; A0A0S7FL43; A0A146MW79; A0A0S7JY28; H2LUJ8; I3KQJ0; Q805C7; Q805C9; Q4T142; Q803M1; A0A060WLJ6; A0A096M4B0; A0A146VDU0; G1FCF2; H3DDF1; A0A0P7WSD3; H2TYG2; B5X1U5; Q6P0W3; A0A060VSE4; H2RS10; H2M…	622.33	1243.65	-0.571005	-0.000355066	22.7094	51.2574
High	VGLLHSQNTSLINTK	G9M5T1; T2HFG0; C0STL2; H3DR28	A8R0Q2; G3N9L2; H3CMX1; Q4RXH7; H3DB42; H3CNI4; H3BX59; G9M5T1; Q91520; C4TIP1; Q98TQ4; H2ULB1; T2HFG0; Q90339; Q4RXH2; H3DB41; I3KAL6; G3N9K5; A0A059PBU4; Q4SSC7; H2ULB2; Q4SSC6; C0STL2; Q5NTZ3; H2L9E3; Q9DFM1; H2L9D3; H3CNI3; O42352; A0A0F8CCG0; G3N9L9; A6NA52; H2ULB3; Q90338; A6NA53; H3DB44; A0A060X652; C0STL3; G9M5T2; E7FAD0; Q6QUR5; H3DR28; H3DB40; A0A060X4S9; A0A0P7TSX6	542.305	1624.9	-0.781766	-0.000423431	100	51.2177
High	VGLLHSQNTSLLNTK	B1Q382; A0A087XQZ5; B3DJM6; H2UN88; Q8JIP5; A0A0F8C3K6; Q05K06; B1Q385; D6PVQ0; A0A060Y971	H3CMS0; H2LNV3; B1Q382; F1R6C7; F4ZQR5; A0A147A0M4; Q05K11; M3ZPQ1; A0A060YBV0; A0A0S7JAN2; Q91208; A0A060Y5W1; A0A087XQZ5; A0A060XRS6; Q508P7; I3IZY8; Q9IBD7; Q05K07; A0A0S7J8H5; A0A087X5F9; B8A561; B3DJM6; Q05K09; Q05K08; A0A146W530; A0A146W7Q9; A0A060YKV8; A0A0S7J8I5; Q90ZE5; A0A060XTA3; A0A060XSP7; H2UN88; Q6IQX1; E1CHP3; B1Q383; I3IZU1; A0A146W4S2; Q8JIP5; A0A146ZZE3; A0A146ZZF8; A0A0F8C3K6;…	542.305	1624.9	-0.781766	-0.000423431	100	51.2177
High	IQLVEEELDR	D6PVP3; H2LUJ8; Q8JIM7; A0A0F8AT58; Q5SPK6; A0A146W5Y8; A0A147AWH1; A0A0S7K258; A0A087XSB4; A0A147A2G3; H2SQV9; A0A087YEU9; A0A087YF71; P13104; H2MA79; A0A0F8CF82	H3CSI6; G3PBG3; A0A0S7FPU0; Q805C4; A0A146YIJ7; A0A0S7K1B6; A0A0R4INL7; A0A0R4IM99; A0A146P4T3; A0A0P7V399; Q805C3; A0A060X0I2; B9ELP6; K4PEK4; A0A060WJN0; H2RS11; D6PVP3; E3TC29; H2SQW0; Q1LXM2; W5UML0; A0A0S7FL43; A0A146MW79; A0A0S7JY28; H2LUJ8; I3KQJ0; Q805C7; Q805C9; Q4T142; Q803M1; A0A060WLJ6; A0A096M4B0; A0A146VDU0; G1FCF2; H3DDF1; A0A0P7WSD3; H2TYG2; B5X1U5; Q6P0W3; A0A060VSE4; H2RS10; H2M…	622.33	1243.65	-0.47285	-0.000294031	44.1523	51.2131
High	EELDEIIEEVDEDGSGTIDFEEFLVMMVR	A0A060WZV7	F5BZS8; B9EP57; H2SBN2; B9VJM4; H2L8Q7; A0A146V9Q1; A0A146P9L9; I3IZI3; H2L8Q9; A0A060WZV7; Q4RB38; A0A060YT85; H2L8R0; A0A146ZN37; G3NJM6	1130.18	3388.53	-0.588208	-0.000664387	100	170.824
High	LVIIESDLER	H2LUJ8; Q8AV86; Q8JIM7; A0A147A2G3; H2SQV9; A0A087YEU9; H2MA79	A0A060X0I2; H2SQW0; H2LUJ8; Q805C9; A0A096M4B0; Q8AV86; Q8JIM7; G3PVL2; Q805D0; H2SQV7; H2MA80; Q4SAI3; A0A147A2G3; H2SQV9; A0A087YEU9; A0A146WFT2; A0A060W8G0; B5X4E8; Q91472; M4AS27; H3BYP9; G3PVL1; H2MA79; H2SQV8; A0A146WDB4; H3C0I1; G3PVK9	593.837	1186.67	-0.520207	-0.000308657	55.17	53.0652
High	MLGQNPTREELDEIIEEVDEDGSGTIDFEEFLVMMVR	A0A060WZV7	F5BZS8; B9EP57; H2SBN2; B9VJM4; H2L8Q7; A0A146V9Q1; A0A146P9L9; I3IZI3; H2L8Q9; A0A060WZV7; Q4RB38; A0A060YT85; H2L8R0; A0A146ZN37; G3NJM6	1429.34	4286.01	5.57917	0.00797074	100	178.39
High	MLGQNPTREELDEIIEEVDEDGSGTIDFEEFLVMMVR	A0A060WZV7	F5BZS8; B9EP57; H2SBN2; B9VJM4; H2L8Q7; A0A146V9Q1; A0A146P9L9; I3IZI3; H2L8Q9; A0A060WZV7; Q4RB38; A0A060YT85; H2L8R0; A0A146ZN37; G3NJM6	1429.33	4285.99	0.623428	0.000890666	100	178.934
High	LQEAEEQIEAVNSK	B1Q382; B3DJM6; W5L2L4; P87344; B1Q385; D6PVQ0; Q98TQ5; A0A0F8CGF3	B1Q382; F1R6C7; C4TIP2; H3CE06; C4TIP3; Q2PMW9; Q4T6M5; H2SKR3; H2SKR2; Q508P7; B8A561; B3DJM6; W5L2L4; A0A0F8ANR8; G3NES6; G3NEV3; Q90ZE5; Q6IQX1; H2S271; Q6QUR8; B1Q383; G3NF36; A0A0F8CAS0; A4PDX4; A2BGX6; G3NEW0; A0A0F8ASB4; I3JYT9; P87344; I3JT59; H2SKR0; B1Q385; Q2HX57; D6PVQ0; A4PDX5; Q4STF9; F1Q5K4; H2MWE2; Q98TQ6; B1Q384; Q2HX58; G3NF22; H3CMS1; A0A0F8B949; B8A568; Q98TQ5; A0A0F8CGF3; B7S…	794.394	1587.78	-3.45825	-0.00274548	100	34.5972
High	MLGQNPTREELDEIIEEVDEDGSGTIDFEEFLVMMVR	A0A060WZV7	F5BZS8; B9EP57; H2SBN2; B9VJM4; H2L8Q7; A0A146V9Q1; A0A146P9L9; I3IZI3; H2L8Q9; A0A060WZV7; Q4RB38; A0A060YT85; H2L8R0; A0A146ZN37; G3NJM6	1072.25	4285.97	-2.61234	-0.00279911	100	183.373
High	VAEQELVDASER	G9M5T1; A0A087XQZ5; T2HFG0; B3DJM6; W5L2L4; H2UN88; C0STL2; A0A0F8C3K6; P87344; Q05K06; D6PVQ0; A0A0F8CGF3; H3DR28; Q33BP2	H3CMS0; A0A146QK60; M3ZV86; A8R0Q2; Q05K05; H2LNV3; Q789E7; G3N9L2; F1R6C7; C0STL4; H3CMX1; Q90YF6; A0A147A0M4; Q05K11; A0A087YKG8; A0A146Q5H9; A0A0F8C274; M3ZPQ1; Q4RXH7; H3DB42; A0A146RQV8; H3CNI4; H3BX59; A0A146W4J3; A0A0S7JAN2; G9M5T1; A0A087XQZ5; A0A0S7K7R5; A0A146Y740; Q90337; Q91520; C4TIP1; Q98TQ4; A0A146U920; Q508P7; A0A146SGF7; A4GWV4; H2ULB1; T2HFG0; I3IZY8; Q90339; Q4RXH2; Q9IBD7; Q05…	673.333	1345.66	-0.218468	-0.000146992	100	34.4842
High	VAEQELVDASER	G9M5T1; A0A087XQZ5; T2HFG0; B3DJM6; W5L2L4; H2UN88; C0STL2; A0A0F8C3K6; P87344; Q05K06; D6PVQ0; A0A0F8CGF3; H3DR28; Q33BP2	H3CMS0; A0A146QK60; M3ZV86; A8R0Q2; Q05K05; H2LNV3; Q789E7; G3N9L2; F1R6C7; C0STL4; H3CMX1; Q90YF6; A0A147A0M4; Q05K11; A0A087YKG8; A0A146Q5H9; A0A0F8C274; M3ZPQ1; Q4RXH7; H3DB42; A0A146RQV8; H3CNI4; H3BX59; A0A146W4J3; A0A0S7JAN2; G9M5T1; A0A087XQZ5; A0A0S7K7R5; A0A146Y740; Q90337; Q91520; C4TIP1; Q98TQ4; A0A146U920; Q508P7; A0A146SGF7; A4GWV4; H2ULB1; T2HFG0; I3IZY8; Q90339; Q4RXH2; Q9IBD7; Q05…	673.333	1345.66	-0.309183	-0.000208027	100	34.4336
High	VAEQELVDASER	G9M5T1; A0A087XQZ5; T2HFG0; B3DJM6; W5L2L4; H2UN88; C0STL2; A0A0F8C3K6; P87344; Q05K06; D6PVQ0; A0A0F8CGF3; H3DR28; Q33BP2	H3CMS0; A0A146QK60; M3ZV86; A8R0Q2; Q05K05; H2LNV3; Q789E7; G3N9L2; F1R6C7; C0STL4; H3CMX1; Q90YF6; A0A147A0M4; Q05K11; A0A087YKG8; A0A146Q5H9; A0A0F8C274; M3ZPQ1; Q4RXH7; H3DB42; A0A146RQV8; H3CNI4; H3BX59; A0A146W4J3; A0A0S7JAN2; G9M5T1; A0A087XQZ5; A0A0S7K7R5; A0A146Y740; Q90337; Q91520; C4TIP1; Q98TQ4; A0A146U920; Q508P7; A0A146SGF7; A4GWV4; H2ULB1; T2HFG0; I3IZY8; Q90339; Q4RXH2; Q9IBD7; Q05…	673.333	1345.66	0.235102	0.000158184	100	34.3826
High	AADAESDVASLNR	Q8AV86	Q8AV86	659.815	1318.62	-0.0997297	-6.5753e-05	91.3651	33.5225
High	MLGQNPTREELDEIIEEVDEDGSGTIDFEEFLVMMVR	A0A060WZV7	F5BZS8; B9EP57; H2SBN2; B9VJM4; H2L8Q7; A0A146V9Q1; A0A146P9L9; I3IZI3; H2L8Q9; A0A060WZV7; Q4RB38; A0A060YT85; H2L8R0; A0A146ZN37; G3NJM6	1429.33	4285.99	1.39242	0.0019893	100	183.401
High	MLGQNPTREELDEIIEEVDEDGSGTIDFEEFLVMMVR	A0A060WZV7	F5BZS8; B9EP57; H2SBN2; B9VJM4; H2L8Q7; A0A146V9Q1; A0A146P9L9; I3IZI3; H2L8Q9; A0A060WZV7; Q4RB38; A0A060YT85; H2L8R0; A0A146ZN37; G3NJM6	1429.33	4285.97	-2.96522	-0.00423629	100	183.456
High	EELDEIIEEVDEDGSGTIDFEEFLVMMVR	A0A060WZV7	F5BZS8; B9EP57; H2SBN2; B9VJM4; H2L8Q7; A0A146V9Q1; A0A146P9L9; I3IZI3; H2L8Q9; A0A060WZV7; Q4RB38; A0A060YT85; H2L8R0; A0A146ZN37; G3NJM6	1130.18	3388.52	-3.18197	-0.00359407	100	186.396
High	MLGQNPTREELDEIIEEVDEDGSGTIDFEEFLVMMVR	A0A060WZV7	F5BZS8; B9EP57; H2SBN2; B9VJM4; H2L8Q7; A0A146V9Q1; A0A146P9L9; I3IZI3; H2L8Q9; A0A060WZV7; Q4RB38; A0A060YT85; H2L8R0; A0A146ZN37; G3NJM6	1429.34	4286.01	5.40828	0.0077266	100	186.465
High	VAEQELVDASER	G9M5T1; A0A087XQZ5; T2HFG0; B3DJM6; W5L2L4; H2UN88; C0STL2; A0A0F8C3K6; P87344; Q05K06; D6PVQ0; A0A0F8CGF3; H3DR28; Q33BP2	H3CMS0; A0A146QK60; M3ZV86; A8R0Q2; Q05K05; H2LNV3; Q789E7; G3N9L2; F1R6C7; C0STL4; H3CMX1; Q90YF6; A0A147A0M4; Q05K11; A0A087YKG8; A0A146Q5H9; A0A0F8C274; M3ZPQ1; Q4RXH7; H3DB42; A0A146RQV8; H3CNI4; H3BX59; A0A146W4J3; A0A0S7JAN2; G9M5T1; A0A087XQZ5; A0A0S7K7R5; A0A146Y740; Q90337; Q91520; C4TIP1; Q98TQ4; A0A146U920; Q508P7; A0A146SGF7; A4GWV4; H2ULB1; T2HFG0; I3IZY8; Q90339; Q4RXH2; Q9IBD7; Q05…	673.333	1345.66	-0.309183	-0.000208027	100	31.1679
High	LQEAEEQIEAVNSK	B1Q382; B3DJM6; W5L2L4; P87344; B1Q385; D6PVQ0; Q98TQ5; A0A0F8CGF3	B1Q382; F1R6C7; C4TIP2; H3CE06; C4TIP3; Q2PMW9; Q4T6M5; H2SKR3; H2SKR2; Q508P7; B8A561; B3DJM6; W5L2L4; A0A0F8ANR8; G3NES6; G3NEV3; Q90ZE5; Q6IQX1; H2S271; Q6QUR8; B1Q383; G3NF36; A0A0F8CAS0; A4PDX4; A2BGX6; G3NEW0; A0A0F8ASB4; I3JYT9; P87344; I3JT59; H2SKR0; B1Q385; Q2HX57; D6PVQ0; A4PDX5; Q4STF9; F1Q5K4; H2MWE2; Q98TQ6; B1Q384; Q2HX58; G3NF22; H3CMS1; A0A0F8B949; B8A568; Q98TQ5; A0A0F8CGF3; B7S…	794.396	1587.79	-0.229256	-0.000182005	100	31.1511
High	LQEAEEQIEAVNSK	B1Q382; B3DJM6; W5L2L4; P87344; B1Q385; D6PVQ0; Q98TQ5; A0A0F8CGF3	B1Q382; F1R6C7; C4TIP2; H3CE06; C4TIP3; Q2PMW9; Q4T6M5; H2SKR3; H2SKR2; Q508P7; B8A561; B3DJM6; W5L2L4; A0A0F8ANR8; G3NES6; G3NEV3; Q90ZE5; Q6IQX1; H2S271; Q6QUR8; B1Q383; G3NF36; A0A0F8CAS0; A4PDX4; A2BGX6; G3NEW0; A0A0F8ASB4; I3JYT9; P87344; I3JT59; H2SKR0; B1Q385; Q2HX57; D6PVQ0; A4PDX5; Q4STF9; F1Q5K4; H2MWE2; Q98TQ6; B1Q384; Q2HX58; G3NF22; H3CMS1; A0A0F8B949; B8A568; Q98TQ5; A0A0F8CGF3; B7S…	794.398	1587.79	1.07772	0.000855593	100	31.1117
High	LQEAEEQIEAVNSK	B1Q382; B3DJM6; W5L2L4; P87344; B1Q385; D6PVQ0; Q98TQ5; A0A0F8CGF3	B1Q382; F1R6C7; C4TIP2; H3CE06; C4TIP3; Q2PMW9; Q4T6M5; H2SKR3; H2SKR2; Q508P7; B8A561; B3DJM6; W5L2L4; A0A0F8ANR8; G3NES6; G3NEV3; Q90ZE5; Q6IQX1; H2S271; Q6QUR8; B1Q383; G3NF36; A0A0F8CAS0; A4PDX4; A2BGX6; G3NEW0; A0A0F8ASB4; I3JYT9; P87344; I3JT59; H2SKR0; B1Q385; Q2HX57; D6PVQ0; A4PDX5; Q4STF9; F1Q5K4; H2MWE2; Q98TQ6; B1Q384; Q2HX58; G3NF22; H3CMS1; A0A0F8B949; B8A568; Q98TQ5; A0A0F8CGF3; B7S…	794.397	1587.79	0.693314	0.000550417	100	34.7376
High	LQEAEEQIEAVNSK	B1Q382; B3DJM6; W5L2L4; P87344; B1Q385; D6PVQ0; Q98TQ5; A0A0F8CGF3	B1Q382; F1R6C7; C4TIP2; H3CE06; C4TIP3; Q2PMW9; Q4T6M5; H2SKR3; H2SKR2; Q508P7; B8A561; B3DJM6; W5L2L4; A0A0F8ANR8; G3NES6; G3NEV3; Q90ZE5; Q6IQX1; H2S271; Q6QUR8; B1Q383; G3NF36; A0A0F8CAS0; A4PDX4; A2BGX6; G3NEW0; A0A0F8ASB4; I3JYT9; P87344; I3JT59; H2SKR0; B1Q385; Q2HX57; D6PVQ0; A4PDX5; Q4STF9; F1Q5K4; H2MWE2; Q98TQ6; B1Q384; Q2HX58; G3NF22; H3CMS1; A0A0F8B949; B8A568; Q98TQ5; A0A0F8CGF3; B7S…	794.397	1587.79	0.232029	0.000184206	100	31.051
High	AADAESDVASLNR	Q8AV86	Q8AV86	659.815	1318.62	-0.840322	-0.000554034	100	30.3067
High	AADAESDVASLNR	Q8AV86	Q8AV86	659.815	1318.62	-0.284878	-0.000187823	100	30.2054
High	MLGQNPTREELDEIIEEVDEDGSGTIDFEEFLVMMVR	A0A060WZV7	F5BZS8; B9EP57; H2SBN2; B9VJM4; H2L8Q7; A0A146V9Q1; A0A146P9L9; I3IZI3; H2L8Q9; A0A060WZV7; Q4RB38; A0A060YT85; H2L8R0; A0A146ZN37; G3NJM6	1429.33	4285.98	0.196208	0.000280315	100	186.513
High	MLGQNPTREELDEIIEEVDEDGSGTIDFEEFLVMMVR	A0A060WZV7	F5BZS8; B9EP57; H2SBN2; B9VJM4; H2L8Q7; A0A146V9Q1; A0A146P9L9; I3IZI3; H2L8Q9; A0A060WZV7; Q4RB38; A0A060YT85; H2L8R0; A0A146ZN37; G3NJM6	1072.25	4285.98	0.463643	0.000496792	100	186.534
High	EELDEIIEEVDEDGSGTIDFEEFLVMMVR	A0A060WZV7	F5BZS8; B9EP57; H2SBN2; B9VJM4; H2L8Q7; A0A146V9Q1; A0A146P9L9; I3IZI3; H2L8Q9; A0A060WZV7; Q4RB38; A0A060YT85; H2L8R0; A0A146ZN37; G3NJM6	1130.18	3388.53	-1.0205	-0.00115267	100	189.456
High	QSEEAEEQANSYLSK	P87344	P87344	856.881	1712.75	-3.8788	-0.00332173	100	29.4567
High	MLGQNPTREELDEIIEEVDEDGSGTIDFEEFLVMMVR	A0A060WZV7	F5BZS8; B9EP57; H2SBN2; B9VJM4; H2L8Q7; A0A146V9Q1; A0A146P9L9; I3IZI3; H2L8Q9; A0A060WZV7; Q4RB38; A0A060YT85; H2L8R0; A0A146ZN37; G3NJM6	1429.34	4285.99	2.07597	0.00296586	100	189.631
High	VAEQELVDASER	G9M5T1; A0A087XQZ5; T2HFG0; B3DJM6; W5L2L4; H2UN88; C0STL2; A0A0F8C3K6; P87344; Q05K06; D6PVQ0; A0A0F8CGF3; H3DR28; Q33BP2	H3CMS0; A0A146QK60; M3ZV86; A8R0Q2; Q05K05; H2LNV3; Q789E7; G3N9L2; F1R6C7; C0STL4; H3CMX1; Q90YF6; A0A147A0M4; Q05K11; A0A087YKG8; A0A146Q5H9; A0A0F8C274; M3ZPQ1; Q4RXH7; H3DB42; A0A146RQV8; H3CNI4; H3BX59; A0A146W4J3; A0A0S7JAN2; G9M5T1; A0A087XQZ5; A0A0S7K7R5; A0A146Y740; Q90337; Q91520; C4TIP1; Q98TQ4; A0A146U920; Q508P7; A0A146SGF7; A4GWV4; H2ULB1; T2HFG0; I3IZY8; Q90339; Q4RXH2; Q9IBD7; Q05…	673.333	1345.66	0.144388	9.71486e-05	97.5712	28.0579
High	KAADAESDVASLNR	Q8AV86	Q8AV86	723.862	1446.72	-0.676189	-0.000489127	100	27.8989
High	KAADAESDVASLNR	Q8AV86	Q8AV86	723.863	1446.72	-0.254302	-0.000183952	85.9356	27.8556
High	KAADAESDVASLNR	Q8AV86	Q8AV86	723.863	1446.72	0.33634	0.000243294	100	27.8012
High	KAADAESDVASLNR	Q8AV86	Q8AV86	723.861	1446.72	-1.94185	-0.00140465	80.1896	27.7681
High	AADAESDVASLNR	Q8AV86	Q8AV86	659.815	1318.62	-0.00715566	-4.71781e-06	28.3439	27.1584
High	LQEAEEQIEAVNSK	B1Q382; B3DJM6; W5L2L4; P87344; B1Q385; D6PVQ0; Q98TQ5; A0A0F8CGF3	B1Q382; F1R6C7; C4TIP2; H3CE06; C4TIP3; Q2PMW9; Q4T6M5; H2SKR3; H2SKR2; Q508P7; B8A561; B3DJM6; W5L2L4; A0A0F8ANR8; G3NES6; G3NEV3; Q90ZE5; Q6IQX1; H2S271; Q6QUR8; B1Q383; G3NF36; A0A0F8CAS0; A4PDX4; A2BGX6; G3NEW0; A0A0F8ASB4; I3JYT9; P87344; I3JT59; H2SKR0; B1Q385; Q2HX57; D6PVQ0; A4PDX5; Q4STF9; F1Q5K4; H2MWE2; Q98TQ6; B1Q384; Q2HX58; G3NF22; H3CMS1; A0A0F8B949; B8A568; Q98TQ5; A0A0F8CGF3; B7S…	794.397	1587.79	0.693314	0.000550417	100	30.9621
High	MLGQNPTREELDEIIEEVDEDGSGTIDFEEFLVMMVR	A0A060WZV7	F5BZS8; B9EP57; H2SBN2; B9VJM4; H2L8Q7; A0A146V9Q1; A0A146P9L9; I3IZI3; H2L8Q9; A0A060WZV7; Q4RB38; A0A060YT85; H2L8R0; A0A146ZN37; G3NJM6	1429.33	4285.98	-1.00001	-0.00142867	100	178.639
High	LQEAEEQIEAVNSK	B1Q382; B3DJM6; W5L2L4; P87344; B1Q385; D6PVQ0; Q98TQ5; A0A0F8CGF3	B1Q382; F1R6C7; C4TIP2; H3CE06; C4TIP3; Q2PMW9; Q4T6M5; H2SKR3; H2SKR2; Q508P7; B8A561; B3DJM6; W5L2L4; A0A0F8ANR8; G3NES6; G3NEV3; Q90ZE5; Q6IQX1; H2S271; Q6QUR8; B1Q383; G3NF36; A0A0F8CAS0; A4PDX4; A2BGX6; G3NEW0; A0A0F8ASB4; I3JYT9; P87344; I3JT59; H2SKR0; B1Q385; Q2HX57; D6PVQ0; A4PDX5; Q4STF9; F1Q5K4; H2MWE2; Q98TQ6; B1Q384; Q2HX58; G3NF22; H3CMS1; A0A0F8B949; B8A568; Q98TQ5; A0A0F8CGF3; B7S…	794.395	1587.78	-1.61311	-0.00128064	100	34.8394
High	LDEAENLAMK	B1Q382; A0A087XQZ5; T2HFG0; B3DJM6; W5L2L4; H2UN88; Q8JIP5; A0A0F8C3K6; P87344; Q05K06; B1Q385; D6PVQ0; A0A060Y971; Q98TQ5; H3DR28	A7M6P0; H3CMS0; Q05K05; H2LNV3; B1Q382; G3N9L2; F1R6C7; F4ZQR5; C0STL4; H3CMX1; Q90YF6; C4TIP2; A0A147A0M4; Q05K11; A0A087YKG8; H2UKT9; C4TIP3; A7M6P1; A0A146Q5H9; Q2PMW9; A0A060XH29; M3ZPQ1; A8R0Q7; Q4RXH7; A0A146RH13; H2SKR3; H3DB42; A0A060YBV0; A0A060YS70; H3CNI4; H3BX59; A0A146W4J3; A0A0S7JAN2; A7M6P2; Q91208; A0A060Y5W1; A0A087XQZ5; A0A146Y740; A0A146Y8S1; C4TIP1; A0A060XRS6; A0A146Y712; H2S…	567.279	1133.55	-0.856004	-0.000485162	100	34.9114
High	QSEEAEEQANSYLSK	P87344	P87344	856.885	1712.76	1.11018	0.000950736	100	41.5007
High	LQEAEEQIEAVNSK	B1Q382; B3DJM6; W5L2L4; P87344; B1Q385; D6PVQ0; Q98TQ5; A0A0F8CGF3	B1Q382; F1R6C7; C4TIP2; H3CE06; C4TIP3; Q2PMW9; Q4T6M5; H2SKR3; H2SKR2; Q508P7; B8A561; B3DJM6; W5L2L4; A0A0F8ANR8; G3NES6; G3NEV3; Q90ZE5; Q6IQX1; H2S271; Q6QUR8; B1Q383; G3NF36; A0A0F8CAS0; A4PDX4; A2BGX6; G3NEW0; A0A0F8ASB4; I3JYT9; P87344; I3JT59; H2SKR0; B1Q385; Q2HX57; D6PVQ0; A4PDX5; Q4STF9; F1Q5K4; H2MWE2; Q98TQ6; B1Q384; Q2HX58; G3NF22; H3CMS1; A0A0F8B949; B8A568; Q98TQ5; A0A0F8CGF3; B7S…	794.397	1587.79	0.078267	6.21356e-05	100	41.2517
High	QSEEAEEQANSYLSK	P87344	P87344	856.883	1712.76	-1.52685	-0.00130756	100	41.2177
High	LQEAEEQIEAVNSK	B1Q382; B3DJM6; W5L2L4; P87344; B1Q385; D6PVQ0; Q98TQ5; A0A0F8CGF3	B1Q382; F1R6C7; C4TIP2; H3CE06; C4TIP3; Q2PMW9; Q4T6M5; H2SKR3; H2SKR2; Q508P7; B8A561; B3DJM6; W5L2L4; A0A0F8ANR8; G3NES6; G3NEV3; Q90ZE5; Q6IQX1; H2S271; Q6QUR8; B1Q383; G3NF36; A0A0F8CAS0; A4PDX4; A2BGX6; G3NEW0; A0A0F8ASB4; I3JYT9; P87344; I3JT59; H2SKR0; B1Q385; Q2HX57; D6PVQ0; A4PDX5; Q4STF9; F1Q5K4; H2MWE2; Q98TQ6; B1Q384; Q2HX58; G3NF22; H3CMS1; A0A0F8B949; B8A568; Q98TQ5; A0A0F8CGF3; B7S…	794.395	1587.78	-1.76687	-0.00140271	100	41.2059
High	MLGQNPTREELDEIIEEVDEDGSGTIDFEEFLVMMVR	A0A060WZV7	F5BZS8; B9EP57; H2SBN2; B9VJM4; H2L8Q7; A0A146V9Q1; A0A146P9L9; I3IZI3; H2L8Q9; A0A060WZV7; Q4RB38; A0A060YT85; H2L8R0; A0A146ZN37; G3NJM6	1429.34	4286	2.93041	0.00418656	100	179.362
High	LQEAEEQIEAVNSK	B1Q382; B3DJM6; W5L2L4; P87344; B1Q385; D6PVQ0; Q98TQ5; A0A0F8CGF3	B1Q382; F1R6C7; C4TIP2; H3CE06; C4TIP3; Q2PMW9; Q4T6M5; H2SKR3; H2SKR2; Q508P7; B8A561; B3DJM6; W5L2L4; A0A0F8ANR8; G3NES6; G3NEV3; Q90ZE5; Q6IQX1; H2S271; Q6QUR8; B1Q383; G3NF36; A0A0F8CAS0; A4PDX4; A2BGX6; G3NEW0; A0A0F8ASB4; I3JYT9; P87344; I3JT59; H2SKR0; B1Q385; Q2HX57; D6PVQ0; A4PDX5; Q4STF9; F1Q5K4; H2MWE2; Q98TQ6; B1Q384; Q2HX58; G3NF22; H3CMS1; A0A0F8B949; B8A568; Q98TQ5; A0A0F8CGF3; B7S…	794.397	1587.79	0.616433	0.000489382	100	41.149
High	LQEAEEQIEAVNSK	B1Q382; B3DJM6; W5L2L4; P87344; B1Q385; D6PVQ0; Q98TQ5; A0A0F8CGF3	B1Q382; F1R6C7; C4TIP2; H3CE06; C4TIP3; Q2PMW9; Q4T6M5; H2SKR3; H2SKR2; Q508P7; B8A561; B3DJM6; W5L2L4; A0A0F8ANR8; G3NES6; G3NEV3; Q90ZE5; Q6IQX1; H2S271; Q6QUR8; B1Q383; G3NF36; A0A0F8CAS0; A4PDX4; A2BGX6; G3NEW0; A0A0F8ASB4; I3JYT9; P87344; I3JT59; H2SKR0; B1Q385; Q2HX57; D6PVQ0; A4PDX5; Q4STF9; F1Q5K4; H2MWE2; Q98TQ6; B1Q384; Q2HX58; G3NF22; H3CMS1; A0A0F8B949; B8A568; Q98TQ5; A0A0F8CGF3; B7S…	794.397	1587.79	0.923956	0.000733522	100	41.0973
High	VAEQELVDASER	G9M5T1; A0A087XQZ5; T2HFG0; B3DJM6; W5L2L4; H2UN88; C0STL2; A0A0F8C3K6; P87344; Q05K06; D6PVQ0; A0A0F8CGF3; H3DR28; Q33BP2	H3CMS0; A0A146QK60; M3ZV86; A8R0Q2; Q05K05; H2LNV3; Q789E7; G3N9L2; F1R6C7; C0STL4; H3CMX1; Q90YF6; A0A147A0M4; Q05K11; A0A087YKG8; A0A146Q5H9; A0A0F8C274; M3ZPQ1; Q4RXH7; H3DB42; A0A146RQV8; H3CNI4; H3BX59; A0A146W4J3; A0A0S7JAN2; G9M5T1; A0A087XQZ5; A0A0S7K7R5; A0A146Y740; Q90337; Q91520; C4TIP1; Q98TQ4; A0A146U920; Q508P7; A0A146SGF7; A4GWV4; H2ULB1; T2HFG0; I3IZY8; Q90339; Q4RXH2; Q9IBD7; Q05…	673.334	1345.66	0.325816	0.000219219	100	40.9238
High	MLGQNPTREELDEIIEEVDEDGSGTIDFEEFLVMMVR	A0A060WZV7	F5BZS8; B9EP57; H2SBN2; B9VJM4; H2L8Q7; A0A146V9Q1; A0A146P9L9; I3IZI3; H2L8Q9; A0A060WZV7; Q4RB38; A0A060YT85; H2L8R0; A0A146ZN37; G3NJM6	1429.33	4285.99	1.13609	0.00162309	100	180.093
High	MLGQNPTREELDEIIEEVDEDGSGTIDFEEFLVMMVR	A0A060WZV7	F5BZS8; B9EP57; H2SBN2; B9VJM4; H2L8Q7; A0A146V9Q1; A0A146P9L9; I3IZI3; H2L8Q9; A0A060WZV7; Q4RB38; A0A060YT85; H2L8R0; A0A146ZN37; G3NJM6	1072.25	4285.97	-1.92879	-0.00206669	100	180.249
High	IEDEQSLGAQLQK	B1Q382; G9M5T1; A0A087XQZ5; T2HFG0; B3DJM6; H2UN88; C0STL2; A0A0F8C3K6; P87344; Q05K06; B1Q385; A0A060Y971; Q98TQ5; A0A0F8CGF3	A8R0Q2; Q05K05; H2LNV3; B1Q382; Q789E7; F1R6C7; H3CNF0; Q90YF6; C4TIP2; A0A147A0M4; Q05K11; C4TIP3; M3ZPQ1; A8R0Q7; B1PF34; A0A146W7Q2; A0A0F8BDK2; A0A146W4J3; G9M5T1; A0A0F8CX77; A0A060Y5W1; A0A087XQZ5; Q90337; Q508P7; A4GWV4; T2HFG0; I3IZY8; Q90339; Q9IBD7; H2LPK6; Q05K07; G0YU48; Q6SNT2; A0A087X5F9; A0A060YNF5; B8A561; B3DJM6; Q05K09; Q05K08; A0A146W530; A0A146W7Q9; H2LNV4; W5L9M3; H2LP40; A0A…	729.875	1458.74	-0.925524	-0.000675051	100	39.0265
High	IEDEQSLGAQLQK	B1Q382; G9M5T1; A0A087XQZ5; T2HFG0; B3DJM6; H2UN88; C0STL2; A0A0F8C3K6; P87344; Q05K06; B1Q385; A0A060Y971; Q98TQ5; A0A0F8CGF3	A8R0Q2; Q05K05; H2LNV3; B1Q382; Q789E7; F1R6C7; H3CNF0; Q90YF6; C4TIP2; A0A147A0M4; Q05K11; C4TIP3; M3ZPQ1; A8R0Q7; B1PF34; A0A146W7Q2; A0A0F8BDK2; A0A146W4J3; G9M5T1; A0A0F8CX77; A0A060Y5W1; A0A087XQZ5; Q90337; Q508P7; A4GWV4; T2HFG0; I3IZY8; Q90339; Q9IBD7; H2LPK6; Q05K07; G0YU48; Q6SNT2; A0A087X5F9; A0A060YNF5; B8A561; B3DJM6; Q05K09; Q05K08; A0A146W530; A0A146W7Q9; H2LNV4; W5L9M3; H2LP40; A0A…	729.875	1458.74	-0.339751	-0.000247805	100	38.8956
High	IEDEQSLGAQLQK	B1Q382; G9M5T1; A0A087XQZ5; T2HFG0; B3DJM6; H2UN88; C0STL2; A0A0F8C3K6; P87344; Q05K06; B1Q385; A0A060Y971; Q98TQ5; A0A0F8CGF3	A8R0Q2; Q05K05; H2LNV3; B1Q382; Q789E7; F1R6C7; H3CNF0; Q90YF6; C4TIP2; A0A147A0M4; Q05K11; C4TIP3; M3ZPQ1; A8R0Q7; B1PF34; A0A146W7Q2; A0A0F8BDK2; A0A146W4J3; G9M5T1; A0A0F8CX77; A0A060Y5W1; A0A087XQZ5; Q90337; Q508P7; A4GWV4; T2HFG0; I3IZY8; Q90339; Q9IBD7; H2LPK6; Q05K07; G0YU48; Q6SNT2; A0A087X5F9; A0A060YNF5; B8A561; B3DJM6; Q05K09; Q05K08; A0A146W530; A0A146W7Q9; H2LNV4; W5L9M3; H2LP40; A0A…	729.874	1458.74	-1.34393	-0.000980227	100	38.8491
High	LQEAEEQIEAVNSK	B1Q382; B3DJM6; W5L2L4; P87344; B1Q385; D6PVQ0; Q98TQ5; A0A0F8CGF3	B1Q382; F1R6C7; C4TIP2; H3CE06; C4TIP3; Q2PMW9; Q4T6M5; H2SKR3; H2SKR2; Q508P7; B8A561; B3DJM6; W5L2L4; A0A0F8ANR8; G3NES6; G3NEV3; Q90ZE5; Q6IQX1; H2S271; Q6QUR8; B1Q383; G3NF36; A0A0F8CAS0; A4PDX4; A2BGX6; G3NEW0; A0A0F8ASB4; I3JYT9; P87344; I3JT59; H2SKR0; B1Q385; Q2HX57; D6PVQ0; A4PDX5; Q4STF9; F1Q5K4; H2MWE2; Q98TQ6; B1Q384; Q2HX58; G3NF22; H3CMS1; A0A0F8B949; B8A568; Q98TQ5; A0A0F8CGF3; B7S…	794.396	1587.79	-0.306137	-0.00024304	100	34.8786
High	MLGQNPTREELDEIIEEVDEDGSGTIDFEEFLVMMVR	A0A060WZV7	F5BZS8; B9EP57; H2SBN2; B9VJM4; H2L8Q7; A0A146V9Q1; A0A146P9L9; I3IZI3; H2L8Q9; A0A060WZV7; Q4RB38; A0A060YT85; H2L8R0; A0A146ZN37; G3NJM6	1429.33	4285.98	-1.42723	-0.00203902	100	180.332
High	EELDEIIEEVDEDGSGTIDFEEFLVMMVR	A0A060WZV7	F5BZS8; B9EP57; H2SBN2; B9VJM4; H2L8Q7; A0A146V9Q1; A0A146P9L9; I3IZI3; H2L8Q9; A0A060WZV7; Q4RB38; A0A060YT85; H2L8R0; A0A146ZN37; G3NJM6	1130.19	3388.55	3.41051	0.00385221	100	183.273
High	LQEAEEQIEAVNSK	B1Q382; B3DJM6; W5L2L4; P87344; B1Q385; D6PVQ0; Q98TQ5; A0A0F8CGF3	B1Q382; F1R6C7; C4TIP2; H3CE06; C4TIP3; Q2PMW9; Q4T6M5; H2SKR3; H2SKR2; Q508P7; B8A561; B3DJM6; W5L2L4; A0A0F8ANR8; G3NES6; G3NEV3; Q90ZE5; Q6IQX1; H2S271; Q6QUR8; B1Q383; G3NF36; A0A0F8CAS0; A4PDX4; A2BGX6; G3NEW0; A0A0F8ASB4; I3JYT9; P87344; I3JT59; H2SKR0; B1Q385; Q2HX57; D6PVQ0; A4PDX5; Q4STF9; F1Q5K4; H2MWE2; Q98TQ6; B1Q384; Q2HX58; G3NF22; H3CMS1; A0A0F8B949; B8A568; Q98TQ5; A0A0F8CGF3; B7S…	794.396	1587.78	-0.767422	-0.000609251	100	38.0074
High	LQEAEEQIEAVNSK	B1Q382; B3DJM6; W5L2L4; P87344; B1Q385; D6PVQ0; Q98TQ5; A0A0F8CGF3	B1Q382; F1R6C7; C4TIP2; H3CE06; C4TIP3; Q2PMW9; Q4T6M5; H2SKR3; H2SKR2; Q508P7; B8A561; B3DJM6; W5L2L4; A0A0F8ANR8; G3NES6; G3NEV3; Q90ZE5; Q6IQX1; H2S271; Q6QUR8; B1Q383; G3NF36; A0A0F8CAS0; A4PDX4; A2BGX6; G3NEW0; A0A0F8ASB4; I3JYT9; P87344; I3JT59; H2SKR0; B1Q385; Q2HX57; D6PVQ0; A4PDX5; Q4STF9; F1Q5K4; H2MWE2; Q98TQ6; B1Q384; Q2HX58; G3NF22; H3CMS1; A0A0F8B949; B8A568; Q98TQ5; A0A0F8CGF3; B7S…	794.397	1587.79	0.155148	0.000123171	100	37.9622
High	QSEEAEEQANSYLSK	P87344	P87344	856.884	1712.76	-0.243971	-0.000208932	100	37.8172
High	VAEQELVDASER	G9M5T1; A0A087XQZ5; T2HFG0; B3DJM6; W5L2L4; H2UN88; C0STL2; A0A0F8C3K6; P87344; Q05K06; D6PVQ0; A0A0F8CGF3; H3DR28; Q33BP2	H3CMS0; A0A146QK60; M3ZV86; A8R0Q2; Q05K05; H2LNV3; Q789E7; G3N9L2; F1R6C7; C0STL4; H3CMX1; Q90YF6; A0A147A0M4; Q05K11; A0A087YKG8; A0A146Q5H9; A0A0F8C274; M3ZPQ1; Q4RXH7; H3DB42; A0A146RQV8; H3CNI4; H3BX59; A0A146W4J3; A0A0S7JAN2; G9M5T1; A0A087XQZ5; A0A0S7K7R5; A0A146Y740; Q90337; Q91520; C4TIP1; Q98TQ4; A0A146U920; Q508P7; A0A146SGF7; A4GWV4; H2ULB1; T2HFG0; I3IZY8; Q90339; Q4RXH2; Q9IBD7; Q05…	673.334	1345.66	1.41439	0.000951641	100	37.7095
High	VAEQELVDASER	G9M5T1; A0A087XQZ5; T2HFG0; B3DJM6; W5L2L4; H2UN88; C0STL2; A0A0F8C3K6; P87344; Q05K06; D6PVQ0; A0A0F8CGF3; H3DR28; Q33BP2	H3CMS0; A0A146QK60; M3ZV86; A8R0Q2; Q05K05; H2LNV3; Q789E7; G3N9L2; F1R6C7; C0STL4; H3CMX1; Q90YF6; A0A147A0M4; Q05K11; A0A087YKG8; A0A146Q5H9; A0A0F8C274; M3ZPQ1; Q4RXH7; H3DB42; A0A146RQV8; H3CNI4; H3BX59; A0A146W4J3; A0A0S7JAN2; G9M5T1; A0A087XQZ5; A0A0S7K7R5; A0A146Y740; Q90337; Q91520; C4TIP1; Q98TQ4; A0A146U920; Q508P7; A0A146SGF7; A4GWV4; H2ULB1; T2HFG0; I3IZY8; Q90339; Q4RXH2; Q9IBD7; Q05…	673.333	1345.66	-0.127754	-8.59569e-05	100	37.6587
High	QSEEAEEQANSYLSK	P87344	P87344	856.883	1712.76	-1.45558	-0.00124653	100	36.7831
High	AADAESDVASLNR	Q8AV86	Q8AV86	659.815	1318.62	-0.0997297	-6.5753e-05	100	36.6558
High	QSEEAEEQANSYLSK	P87344	P87344	856.884	1712.76	-0.457784	-0.000392038	100	36.1806
High	QSEEAEEQANSYLSK	P87344	P87344	856.884	1712.76	0.397468	0.000340384	100	36.0361
High	QSEEAEEQANSYLSK	P87344	P87344	856.886	1712.76	1.68035	0.00143902	100	35.6114
High	MLGQNPTREELDEIIEEVDEDGSGTIDFEEFLVMMVR	A0A060WZV7	F5BZS8; B9EP57; H2SBN2; B9VJM4; H2L8Q7; A0A146V9Q1; A0A146P9L9; I3IZI3; H2L8Q9; A0A060WZV7; Q4RB38; A0A060YT85; H2L8R0; A0A146ZN37; G3NJM6	1429.33	4285.98	0.281652	0.000402385	100	183.339
High	LDEAENLAMK	B1Q382; A0A087XQZ5; T2HFG0; B3DJM6; W5L2L4; H2UN88; Q8JIP5; A0A0F8C3K6; P87344; Q05K06; B1Q385; D6PVQ0; A0A060Y971; Q98TQ5; H3DR28	A7M6P0; H3CMS0; Q05K05; H2LNV3; B1Q382; G3N9L2; F1R6C7; F4ZQR5; C0STL4; H3CMX1; Q90YF6; C4TIP2; A0A147A0M4; Q05K11; A0A087YKG8; H2UKT9; C4TIP3; A7M6P1; A0A146Q5H9; Q2PMW9; A0A060XH29; M3ZPQ1; A8R0Q7; Q4RXH7; A0A146RH13; H2SKR3; H3DB42; A0A060YBV0; A0A060YS70; H3CNI4; H3BX59; A0A146W4J3; A0A0S7JAN2; A7M6P2; Q91208; A0A060Y5W1; A0A087XQZ5; A0A146Y740; A0A146Y8S1; C4TIP1; A0A060XRS6; A0A146Y712; H2S…	567.278	1133.55	-2.57902	-0.00146172	100	34.9622
High	LQEAEEQIEAVNSK	B1Q382; B3DJM6; W5L2L4; P87344; B1Q385; D6PVQ0; Q98TQ5; A0A0F8CGF3	B1Q382; F1R6C7; C4TIP2; H3CE06; C4TIP3; Q2PMW9; Q4T6M5; H2SKR3; H2SKR2; Q508P7; B8A561; B3DJM6; W5L2L4; A0A0F8ANR8; G3NES6; G3NEV3; Q90ZE5; Q6IQX1; H2S271; Q6QUR8; B1Q383; G3NF36; A0A0F8CAS0; A4PDX4; A2BGX6; G3NEW0; A0A0F8ASB4; I3JYT9; P87344; I3JT59; H2SKR0; B1Q385; Q2HX57; D6PVQ0; A4PDX5; Q4STF9; F1Q5K4; H2MWE2; Q98TQ6; B1Q384; Q2HX58; G3NF22; H3CMS1; A0A0F8B949; B8A568; Q98TQ5; A0A0F8CGF3; B7S…	794.397	1587.79	0.923956	0.000733522	100	38.0591
High	LVIIESDLER	H2LUJ8; Q8AV86; Q8JIM7; A0A147A2G3; H2SQV9; A0A087YEU9; H2MA79	A0A060X0I2; H2SQW0; H2LUJ8; Q805C9; A0A096M4B0; Q8AV86; Q8JIM7; G3PVL2; Q805D0; H2SQV7; H2MA80; Q4SAI3; A0A147A2G3; H2SQV9; A0A087YEU9; A0A146WFT2; A0A060W8G0; B5X4E8; Q91472; M4AS27; H3BYP9; G3PVL1; H2MA79; H2SQV8; A0A146WDB4; H3C0I1; G3PVK9	593.837	1186.67	-0.108735	-6.45161e-05	29.7182	53.1135
High	VGLLHSQNTSLLNTK	B1Q382; A0A087XQZ5; B3DJM6; H2UN88; Q8JIP5; A0A0F8C3K6; Q05K06; B1Q385; D6PVQ0; A0A060Y971	H3CMS0; H2LNV3; B1Q382; F1R6C7; F4ZQR5; A0A147A0M4; Q05K11; M3ZPQ1; A0A060YBV0; A0A0S7JAN2; Q91208; A0A060Y5W1; A0A087XQZ5; A0A060XRS6; Q508P7; I3IZY8; Q9IBD7; Q05K07; A0A0S7J8H5; A0A087X5F9; B8A561; B3DJM6; Q05K09; Q05K08; A0A146W530; A0A146W7Q9; A0A060YKV8; A0A0S7J8I5; Q90ZE5; A0A060XTA3; A0A060XSP7; H2UN88; Q6IQX1; E1CHP3; B1Q383; I3IZU1; A0A146W4S2; Q8JIP5; A0A146ZZE3; A0A146ZZF8; A0A0F8C3K6;…	542.305	1624.9	-0.331017	-0.00017929	70.2172	51.1206
High	GTEDELDKYSEALK	D6PVP3; H2LUJ8; Q8AV86; A0A0F8AT58; A0A146W5Y8; A0A0S7K258; A0A147A2G3; A0A087YF71; E3TFQ0; A0A0F8CF82	A0A0S7K1B6; K4PEK4; D6PVP3; H2LUJ8; G1FCF2; Q6P0W3; A0A060WR17; Q8AV86; G3P8Z9; F8U085; G3N8Q3; X2J4M2; A0A146ZYU7; A0A146W5S1; A0A146W5R6; F6NVA3; A5WW36; A0A0F8AT58; I3KDN0; A0A147AVZ3; Q91489; E7FBZ3; G3P8Z5; B9EMY1; A0A146NCI0; Q91490; A0A146W5Y8; A0A146W2Z9; A0A0S7K258; M4AQP3; A0A147A2G3; A0A087YF71; A0A0S7MHR3; I3ISQ1; A0A087XA45; Q805C6; A0A0P7WKP3; Q76CT4; Q7ZVK9; A0A060WCS0; A0A0P7YL18;…	533.257	1597.76	-1.21193	-0.00064546	46.3517	53.1224
High	VIDSMQTTLDSEVR	Q33BP2	Q33BP2	797.393	1593.78	0.53231	0.000424192	100	54.931
High	VIDSMQTTLDSEVR	Q33BP2	Q33BP2	797.393	1593.78	-0.233607	-0.000186159	100	54.8847
High	VIDSMQTTLDSEVR	Q33BP2	Q33BP2	797.393	1593.78	-0.0804238	-6.40889e-05	100	54.8274
High	QLEDDLVALQK	D6PVP3; Q8AV86; Q8JIM7; Q5SPK6; A0A146W5Y8; A0A0S7K258; A0A147A2G3; H2SQV9; A0A087YEU9; P13104; E3TFQ0; H2MA79	H3CSI6; A0A0S7K1B6; K4PEK4; D6PVP3; H2SQW0; A0A096M4B0; G1FCF2; H3C382; Q8AV86; F8U085; Q8JIM7; X2J4M2; A0A146ZYU7; A0A146W5S1; I3J2Q1; A0A146W5R6; Q805D0; H2SQV7; G3P8Z5; Q8JIM8; Q5SPK6; H2MA80; Q4SAI3; A0A146W5Y8; A0A146W2Z9; A0A0S7K258; W5JYT8; A0A147A2G3; H2SQV9; A0A087YEU9; P13104; B5X4E8; Q91472; A0A087XA45; M4AS27; H3BYP9; Q9DEB7; A0A146W620; E3TFQ0; H2MA79; Q4SM36; W5JZC9; A0A146WDB4	636.345	1271.68	-0.405849	-0.000258056	45.5317	53.1178
High	IQLVEEELDR	D6PVP3; H2LUJ8; Q8JIM7; A0A0F8AT58; Q5SPK6; A0A146W5Y8; A0A147AWH1; A0A0S7K258; A0A087XSB4; A0A147A2G3; H2SQV9; A0A087YEU9; A0A087YF71; P13104; H2MA79; A0A0F8CF82	H3CSI6; G3PBG3; A0A0S7FPU0; Q805C4; A0A146YIJ7; A0A0S7K1B6; A0A0R4INL7; A0A0R4IM99; A0A146P4T3; A0A0P7V399; Q805C3; A0A060X0I2; B9ELP6; K4PEK4; A0A060WJN0; H2RS11; D6PVP3; E3TC29; H2SQW0; Q1LXM2; W5UML0; A0A0S7FL43; A0A146MW79; A0A0S7JY28; H2LUJ8; I3KQJ0; Q805C7; Q805C9; Q4T142; Q803M1; A0A060WLJ6; A0A096M4B0; A0A146VDU0; G1FCF2; H3DDF1; A0A0P7WSD3; H2TYG2; B5X1U5; Q6P0W3; A0A060VSE4; H2RS10; H2M…	622.329	1243.65	-1.55255	-0.000965417	80.4148	54.4614
High	IQLVEEELDR	D6PVP3; H2LUJ8; Q8JIM7; A0A0F8AT58; Q5SPK6; A0A146W5Y8; A0A147AWH1; A0A0S7K258; A0A087XSB4; A0A147A2G3; H2SQV9; A0A087YEU9; A0A087YF71; P13104; H2MA79; A0A0F8CF82	H3CSI6; G3PBG3; A0A0S7FPU0; Q805C4; A0A146YIJ7; A0A0S7K1B6; A0A0R4INL7; A0A0R4IM99; A0A146P4T3; A0A0P7V399; Q805C3; A0A060X0I2; B9ELP6; K4PEK4; A0A060WJN0; H2RS11; D6PVP3; E3TC29; H2SQW0; Q1LXM2; W5UML0; A0A0S7FL43; A0A146MW79; A0A0S7JY28; H2LUJ8; I3KQJ0; Q805C7; Q805C9; Q4T142; Q803M1; A0A060WLJ6; A0A096M4B0; A0A146VDU0; G1FCF2; H3DDF1; A0A0P7WSD3; H2TYG2; B5X1U5; Q6P0W3; A0A060VSE4; H2RS10; H2M…	622.33	1243.65	-0.865469	-0.000538171	100	54.4102
High	IQLVEEELDR	D6PVP3; H2LUJ8; Q8JIM7; A0A0F8AT58; Q5SPK6; A0A146W5Y8; A0A147AWH1; A0A0S7K258; A0A087XSB4; A0A147A2G3; H2SQV9; A0A087YEU9; A0A087YF71; P13104; H2MA79; A0A0F8CF82	H3CSI6; G3PBG3; A0A0S7FPU0; Q805C4; A0A146YIJ7; A0A0S7K1B6; A0A0R4INL7; A0A0R4IM99; A0A146P4T3; A0A0P7V399; Q805C3; A0A060X0I2; B9ELP6; K4PEK4; A0A060WJN0; H2RS11; D6PVP3; E3TC29; H2SQW0; Q1LXM2; W5UML0; A0A0S7FL43; A0A146MW79; A0A0S7JY28; H2LUJ8; I3KQJ0; Q805C7; Q805C9; Q4T142; Q803M1; A0A060WLJ6; A0A096M4B0; A0A146VDU0; G1FCF2; H3DDF1; A0A0P7WSD3; H2TYG2; B5X1U5; Q6P0W3; A0A060VSE4; H2RS10; H2M…	622.33	1243.65	0.116078	7.21802e-05	100	54.3602
High	IQLVEEELDR	D6PVP3; H2LUJ8; Q8JIM7; A0A0F8AT58; Q5SPK6; A0A146W5Y8; A0A147AWH1; A0A0S7K258; A0A087XSB4; A0A147A2G3; H2SQV9; A0A087YEU9; A0A087YF71; P13104; H2MA79; A0A0F8CF82	H3CSI6; G3PBG3; A0A0S7FPU0; Q805C4; A0A146YIJ7; A0A0S7K1B6; A0A0R4INL7; A0A0R4IM99; A0A146P4T3; A0A0P7V399; Q805C3; A0A060X0I2; B9ELP6; K4PEK4; A0A060WJN0; H2RS11; D6PVP3; E3TC29; H2SQW0; Q1LXM2; W5UML0; A0A0S7FL43; A0A146MW79; A0A0S7JY28; H2LUJ8; I3KQJ0; Q805C7; Q805C9; Q4T142; Q803M1; A0A060WLJ6; A0A096M4B0; A0A146VDU0; G1FCF2; H3DDF1; A0A0P7WSD3; H2TYG2; B5X1U5; Q6P0W3; A0A060VSE4; H2RS10; H2M…	622.33	1243.65	-0.276541	-0.00017196	68.9988	54.3102
High	VFDKEGDGTVMGAELR	W5LPS5	W5LPS5	575.283	1723.83	1.68957	0.000970847	100	54.1217
High	GTYDDYVEGLR	B9V2Y1	B6VCB3; C7EP37; A0A146SAL6; A0A0F8AVT1; Q90W48; E3TD53; I3K6V3; Q9PUT0; Q9IB23; Q9IB40; Q9IB38; E3TGB4; B8JKH7; Q9IB26; Q90W53; Q90W43; Q90333; B7U3X5; Q9I8U7; Q90W45; B9V2Y1; Q9IB32; F2WR27; A0A147A177; Q4JMD4; Q9IB29; C9W8L7; H2LAV5; A0A146P771; A0A147A2F8; P82160; A0A0P7TY12; Q9IB35; Q9DEA9; Q90W51; W5KPH6; Q90W40	644.296	1287.59	-0.0319151	-2.05467e-05	100	53.978
High	MEIQEIQLK	A0A146W5Y8; A0A0S7K258; E3TFQ0	A0A0S7K1B6; A0A146MW79; A0A146ZYU7; A0A146W5S1; E2FWP5; A0A146W5R6; F6NVA3; A7WTZ1; F6P435; E7FBZ3; Q6NYQ0; A0A146W5Y8; A0A146W2Z9; A0A0S7K258; A7E2K1; G8JCI4; Q7SXW1; E2IJC8; A0A146MYM3; A0A087XA45; Q7ZVK9; A0A146P5S8; G8JCL1; A0A146W620; Q66LG2; A0A146MVQ5; E3TFQ0; W5JZC9	566.307	1131.61	-0.418976	-0.000237058	41.3706	53.6605
High	MELQEIQLK	D6PVP3; Q8AV86; Q8JIM7; Q5SPK6; A0A147A2G3; H2SQV9; A0A087YF71; P13104; H2MA79; A0A0F8CF82	H3CSI6; A0A060X0I2; K4PEK4; D6PVP3; H2SQW0; Q805C9; Q803M1; A0A060WLJ6; G1FCF2; A0A0P7WSD3; Q6P0W3; Q8AV86; G3P8Z9; Q5SPK5; F8U085; G3N8Q3; Q8JIM7; H2M5M4; G3PVL2; X2J4M2; Q805D2; I3J2Q1; A5HDK1; Q805D0; W5KS79; I3KDN0; A0A147AVZ3; F5A824; Q5YDG9; H2SQV7; G3P8Z5; H9A6B0; Q8JIM8; A0A146NCI0; Q5SPK6; H2MA80; A0A060WRJ2; H9A690; Q4SAI3; A0A0S7FXE9; I3JVV2; M4AQP3; W5JYT8; H3CEU1; A0A147A2G3; H2SQV9;…	566.307	1131.61	-0.418976	-0.000237058	41.3706	53.6605
High	MEIQELQLK		Q805C3; A0A0S7FL43; A0A087X6Z2; A0A146WA78; A0A146WCY3; Q91489; A0A146WD86; H3BWT4; A0A096M9U2; Q4RWQ5; H2TMU3; Q805C2; A0A096MBU4; M3ZEK9; A0A0S7FMG7	566.307	1131.61	-0.418976	-0.000237058	41.3706	53.6605
High	MEIQEIQLK	A0A146W5Y8; A0A0S7K258; E3TFQ0	A0A0S7K1B6; A0A146MW79; A0A146ZYU7; A0A146W5S1; E2FWP5; A0A146W5R6; F6NVA3; A7WTZ1; F6P435; E7FBZ3; Q6NYQ0; A0A146W5Y8; A0A146W2Z9; A0A0S7K258; A7E2K1; G8JCI4; Q7SXW1; E2IJC8; A0A146MYM3; A0A087XA45; Q7ZVK9; A0A146P5S8; G8JCL1; A0A146W620; Q66LG2; A0A146MVQ5; E3TFQ0; W5JZC9	566.307	1131.61	-0.203229	-0.000114988	53.1495	53.611
High	MEIQELQLK		Q805C3; A0A0S7FL43; A0A087X6Z2; A0A146WA78; A0A146WCY3; Q91489; A0A146WD86; H3BWT4; A0A096M9U2; Q4RWQ5; H2TMU3; Q805C2; A0A096MBU4; M3ZEK9; A0A0S7FMG7	566.307	1131.61	-0.203229	-0.000114988	53.1495	53.611
High	MELQEIQLK	D6PVP3; Q8AV86; Q8JIM7; Q5SPK6; A0A147A2G3; H2SQV9; A0A087YF71; P13104; H2MA79; A0A0F8CF82	H3CSI6; A0A060X0I2; K4PEK4; D6PVP3; H2SQW0; Q805C9; Q803M1; A0A060WLJ6; G1FCF2; A0A0P7WSD3; Q6P0W3; Q8AV86; G3P8Z9; Q5SPK5; F8U085; G3N8Q3; Q8JIM7; H2M5M4; G3PVL2; X2J4M2; Q805D2; I3J2Q1; A5HDK1; Q805D0; W5KS79; I3KDN0; A0A147AVZ3; F5A824; Q5YDG9; H2SQV7; G3P8Z5; H9A6B0; Q8JIM8; A0A146NCI0; Q5SPK6; H2MA80; A0A060WRJ2; H9A690; Q4SAI3; A0A0S7FXE9; I3JVV2; M4AQP3; W5JYT8; H3CEU1; A0A147A2G3; H2SQV9;…	566.307	1131.61	-0.203229	-0.000114988	53.1495	53.611
High	MEIQEIQLK	A0A146W5Y8; A0A0S7K258; E3TFQ0	A0A0S7K1B6; A0A146MW79; A0A146ZYU7; A0A146W5S1; E2FWP5; A0A146W5R6; F6NVA3; A7WTZ1; F6P435; E7FBZ3; Q6NYQ0; A0A146W5Y8; A0A146W2Z9; A0A0S7K258; A7E2K1; G8JCI4; Q7SXW1; E2IJC8; A0A146MYM3; A0A087XA45; Q7ZVK9; A0A146P5S8; G8JCL1; A0A146W620; Q66LG2; A0A146MVQ5; E3TFQ0; W5JZC9	566.307	1131.61	-0.958343	-0.000542234	100	53.5599
High	KLVIIESDLER	H2LUJ8; Q8AV86; Q8JIM7; A0A147A2G3; H2SQV9; A0A087YEU9; H2MA79	A0A060X0I2; H2SQW0; H2LUJ8; Q805C9; A0A096M4B0; Q8AV86; Q8JIM7; G3PVL2; Q805D0; H2SQV7; H2MA80; Q4SAI3; A0A147A2G3; H2SQV9; A0A087YEU9; A0A146WFT2; A0A060W8G0; B5X4E8; Q91472; M4AS27; H3BYP9; G3PVL1; H2MA79; H2SQV8; A0A146WDB4; H3C0I1; G3PVK9	438.925	1314.76	-1.84334	-0.000807851	100	54.9368
High	GESGPPGPAGFAGPPGSDGQPGAK	A8QX86	A8QX86; H2MRA6	697.996	2091.97	-0.450201	-0.000313936	100	54.9424
High	VIDSMQTTLDSEVR	Q33BP2	Q33BP2	797.394	1593.78	1.06845	0.000851438	100	54.9728
High	GESGPPGPAGFAGPPGSDGQPGAK	A8QX86	A8QX86; H2MRA6	697.995	2091.97	-1.67559	-0.00116843	100	55.025
High	MLGQNPTREELDEIIEEVDEDGSGTIDFEEFLVMMVR	A0A060WZV7	F5BZS8; B9EP57; H2SBN2; B9VJM4; H2L8Q7; A0A146V9Q1; A0A146P9L9; I3IZI3; H2L8Q9; A0A060WZV7; Q4RB38; A0A060YT85; H2L8R0; A0A146ZN37; G3NJM6	1429.34	4285.99	2.67408	0.00382035	100	195.78
High	MEIQEIQLK	A0A146W5Y8; A0A0S7K258; E3TFQ0	A0A0S7K1B6; A0A146MW79; A0A146ZYU7; A0A146W5S1; E2FWP5; A0A146W5R6; F6NVA3; A7WTZ1; F6P435; E7FBZ3; Q6NYQ0; A0A146W5Y8; A0A146W2Z9; A0A0S7K258; A7E2K1; G8JCI4; Q7SXW1; E2IJC8; A0A146MYM3; A0A087XA45; Q7ZVK9; A0A146P5S8; G8JCL1; A0A146W620; Q66LG2; A0A146MVQ5; E3TFQ0; W5JZC9	566.307	1131.61	-0.526849	-0.000298093	78.0397	56.7071
High	MEIQELQLK		Q805C3; A0A0S7FL43; A0A087X6Z2; A0A146WA78; A0A146WCY3; Q91489; A0A146WD86; H3BWT4; A0A096M9U2; Q4RWQ5; H2TMU3; Q805C2; A0A096MBU4; M3ZEK9; A0A0S7FMG7	566.307	1131.61	-0.526849	-0.000298093	78.0397	56.7071
High	MELQEIQLK	D6PVP3; Q8AV86; Q8JIM7; Q5SPK6; A0A147A2G3; H2SQV9; A0A087YF71; P13104; H2MA79; A0A0F8CF82	H3CSI6; A0A060X0I2; K4PEK4; D6PVP3; H2SQW0; Q805C9; Q803M1; A0A060WLJ6; G1FCF2; A0A0P7WSD3; Q6P0W3; Q8AV86; G3P8Z9; Q5SPK5; F8U085; G3N8Q3; Q8JIM7; H2M5M4; G3PVL2; X2J4M2; Q805D2; I3J2Q1; A5HDK1; Q805D0; W5KS79; I3KDN0; A0A147AVZ3; F5A824; Q5YDG9; H2SQV7; G3P8Z5; H9A6B0; Q8JIM8; A0A146NCI0; Q5SPK6; H2MA80; A0A060WRJ2; H9A690; Q4SAI3; A0A0S7FXE9; I3JVV2; M4AQP3; W5JYT8; H3CEU1; A0A147A2G3; H2SQV9;…	566.307	1131.61	-0.526849	-0.000298093	78.0397	56.7071
High	MLGQNPTREELDEIIEEVDEDGSGTIDFEEFLVMMVR	A0A060WZV7	F5BZS8; B9EP57; H2SBN2; B9VJM4; H2L8Q7; A0A146V9Q1; A0A146P9L9; I3IZI3; H2L8Q9; A0A060WZV7; Q4RB38; A0A060YT85; H2L8R0; A0A146ZN37; G3NJM6	1429.34	4286	3.35763	0.00479692	100	168.01
High	MLGQNPTREELDEIIEEVDEDGSGTIDFEEFLVMMVR	A0A060WZV7	F5BZS8; B9EP57; H2SBN2; B9VJM4; H2L8Q7; A0A146V9Q1; A0A146P9L9; I3IZI3; H2L8Q9; A0A060WZV7; Q4RB38; A0A060YT85; H2L8R0; A0A146ZN37; G3NJM6	1429.34	4286.01	5.75006	0.00821489	100	168.059
High	LVIIESDLER	H2LUJ8; Q8AV86; Q8JIM7; A0A147A2G3; H2SQV9; A0A087YEU9; H2MA79	A0A060X0I2; H2SQW0; H2LUJ8; Q805C9; A0A096M4B0; Q8AV86; Q8JIM7; G3PVL2; Q805D0; H2SQV7; H2MA80; Q4SAI3; A0A147A2G3; H2SQV9; A0A087YEU9; A0A146WFT2; A0A060W8G0; B5X4E8; Q91472; M4AS27; H3BYP9; G3PVL1; H2MA79; H2SQV8; A0A146WDB4; H3C0I1; G3PVK9	593.837	1186.67	-0.108735	-6.45161e-05	83.1151	56.3967
High	LVIIESDLER	H2LUJ8; Q8AV86; Q8JIM7; A0A147A2G3; H2SQV9; A0A087YEU9; H2MA79	A0A060X0I2; H2SQW0; H2LUJ8; Q805C9; A0A096M4B0; Q8AV86; Q8JIM7; G3PVL2; Q805D0; H2SQV7; H2MA80; Q4SAI3; A0A147A2G3; H2SQV9; A0A087YEU9; A0A146WFT2; A0A060W8G0; B5X4E8; Q91472; M4AS27; H3BYP9; G3PVL1; H2MA79; H2SQV8; A0A146WDB4; H3C0I1; G3PVK9	593.838	1186.67	0.405606	0.00024066	100	56.3465
High	MEIQELQLK		Q805C3; A0A0S7FL43; A0A087X6Z2; A0A146WA78; A0A146WCY3; Q91489; A0A146WD86; H3BWT4; A0A096M9U2; Q4RWQ5; H2TMU3; Q805C2; A0A096MBU4; M3ZEK9; A0A0S7FMG7	566.307	1131.61	-0.958343	-0.000542234	100	53.5599
High	LVIIESDLER	H2LUJ8; Q8AV86; Q8JIM7; A0A147A2G3; H2SQV9; A0A087YEU9; H2MA79	A0A060X0I2; H2SQW0; H2LUJ8; Q805C9; A0A096M4B0; Q8AV86; Q8JIM7; G3PVL2; Q805D0; H2SQV7; H2MA80; Q4SAI3; A0A147A2G3; H2SQV9; A0A087YEU9; A0A146WFT2; A0A060W8G0; B5X4E8; Q91472; M4AS27; H3BYP9; G3PVL1; H2MA79; H2SQV8; A0A146WDB4; H3C0I1; G3PVK9	593.837	1186.67	-0.520207	-0.000308657	100	56.2448
High	KDLDDLEITLAK		E9QF07; E7F5L1	458.589	1373.75	-0.0706785	-3.23649e-05	100	55.7405
High	KDIDDLELTLAK	B1Q382; G9M5T1; A0A087XQZ5; T2HFG0; B3DJM6; A0A060VYS1; Q8JIP5; P87344; Q05K06; B1Q385; A0A060Y971; A0A0F8CGF3; A0A146UU13; H3DR28	A0A146QK60; H3CDY9; A8R0Q2; Q05K05; H2LNV3; B1Q382; Q789E7; A0A0F8AH49; G3N9L2; F1R6C7; H3CNF0; H3CMX1; C4TIP2; Q05K11; C4TIP3; A0A146Q5H9; Q2PMW9; A0A0S7GRP3; A8R0Q7; Q4RXH7; B1PF34; H3DB42; I3KU01; A0A060YPQ8; A0A060YBV0; G3PQ58; H3BW93; A0A146W7Q2; H3BX59; G3NEX9; A0A0F8BDK2; A0A060WL78; G9M5T1; M3ZVQ6; G3PQ45; A0A0F8CX77; A0A060Y5W1; A0A087XQZ5; A0A146UU29; Q90337; C4TIP1; A0A0S7GL70; A0A0R4I…	458.589	1373.75	-0.0706785	-3.23649e-05	100	55.7405
High	KDIDDLEITLAK		A0A0N8JYG6; H3CE06; Q4T6M5; E7FD18; A0A0F8ANR8; E6ZFS0; A0A060WLI0; H3CPD1; H2TTI0; R4GDZ5; H2TTH9; I3KWT8	458.589	1373.75	-0.0706785	-3.23649e-05	100	55.7405
High	KDIDDLELTLAK	B1Q382; G9M5T1; A0A087XQZ5; T2HFG0; B3DJM6; A0A060VYS1; Q8JIP5; P87344; Q05K06; B1Q385; A0A060Y971; A0A0F8CGF3; A0A146UU13; H3DR28	A0A146QK60; H3CDY9; A8R0Q2; Q05K05; H2LNV3; B1Q382; Q789E7; A0A0F8AH49; G3N9L2; F1R6C7; H3CNF0; H3CMX1; C4TIP2; Q05K11; C4TIP3; A0A146Q5H9; Q2PMW9; A0A0S7GRP3; A8R0Q7; Q4RXH7; B1PF34; H3DB42; I3KU01; A0A060YPQ8; A0A060YBV0; G3PQ58; H3BW93; A0A146W7Q2; H3BX59; G3NEX9; A0A0F8BDK2; A0A060WL78; G9M5T1; M3ZVQ6; G3PQ45; A0A0F8CX77; A0A060Y5W1; A0A087XQZ5; A0A146UU29; Q90337; C4TIP1; A0A0S7GL70; A0A0R4I…	458.589	1373.75	0.195899	8.97054e-05	100	55.5914
High	KDIDDLEITLAK		A0A0N8JYG6; H3CE06; Q4T6M5; E7FD18; A0A0F8ANR8; E6ZFS0; A0A060WLI0; H3CPD1; H2TTI0; R4GDZ5; H2TTH9; I3KWT8	458.589	1373.75	0.195899	8.97054e-05	100	55.5914
High	KDLDDLEITLAK		E9QF07; E7F5L1	458.589	1373.75	0.195899	8.97054e-05	100	55.5914
High	MLGQNPTREELDEIIEEVDEDGSGTIDFEEFLVMMVR	A0A060WZV7	F5BZS8; B9EP57; H2SBN2; B9VJM4; H2L8Q7; A0A146V9Q1; A0A146P9L9; I3IZI3; H2L8Q9; A0A060WZV7; Q4RB38; A0A060YT85; H2L8R0; A0A146ZN37; G3NJM6	1429.33	4285.97	-1.93989	-0.00277144	100	168.093
High	MLGQNPTREELDEIIEEVDEDGSGTIDFEEFLVMMVR	A0A060WZV7	F5BZS8; B9EP57; H2SBN2; B9VJM4; H2L8Q7; A0A146V9Q1; A0A146P9L9; I3IZI3; H2L8Q9; A0A060WZV7; Q4RB38; A0A060YT85; H2L8R0; A0A146ZN37; G3NJM6	1429.34	4286	3.95574	0.00565141	100	168.136
High	QLEDDLVALQK	D6PVP3; Q8AV86; Q8JIM7; Q5SPK6; A0A146W5Y8; A0A0S7K258; A0A147A2G3; H2SQV9; A0A087YEU9; P13104; E3TFQ0; H2MA79	H3CSI6; A0A0S7K1B6; K4PEK4; D6PVP3; H2SQW0; A0A096M4B0; G1FCF2; H3C382; Q8AV86; F8U085; Q8JIM7; X2J4M2; A0A146ZYU7; A0A146W5S1; I3J2Q1; A0A146W5R6; Q805D0; H2SQV7; G3P8Z5; Q8JIM8; Q5SPK6; H2MA80; Q4SAI3; A0A146W5Y8; A0A146W2Z9; A0A0S7K258; W5JYT8; A0A147A2G3; H2SQV9; A0A087YEU9; P13104; B5X4E8; Q91472; A0A087XA45; M4AS27; H3BYP9; Q9DEB7; A0A146W620; E3TFQ0; H2MA79; Q4SM36; W5JZC9; A0A146WDB4	636.345	1271.68	-1.07779	-0.000685302	100	56.1377
High	MELQEIQLK	D6PVP3; Q8AV86; Q8JIM7; Q5SPK6; A0A147A2G3; H2SQV9; A0A087YF71; P13104; H2MA79; A0A0F8CF82	H3CSI6; A0A060X0I2; K4PEK4; D6PVP3; H2SQW0; Q805C9; Q803M1; A0A060WLJ6; G1FCF2; A0A0P7WSD3; Q6P0W3; Q8AV86; G3P8Z9; Q5SPK5; F8U085; G3N8Q3; Q8JIM7; H2M5M4; G3PVL2; X2J4M2; Q805D2; I3J2Q1; A5HDK1; Q805D0; W5KS79; I3KDN0; A0A147AVZ3; F5A824; Q5YDG9; H2SQV7; G3P8Z5; H9A6B0; Q8JIM8; A0A146NCI0; Q5SPK6; H2MA80; A0A060WRJ2; H9A690; Q4SAI3; A0A0S7FXE9; I3JVV2; M4AQP3; W5JYT8; H3CEU1; A0A147A2G3; H2SQV9;…	566.307	1131.61	-0.958343	-0.000542234	100	53.5599
High	MLGQNPTREELDEIIEEVDEDGSGTIDFEEFLVMMVR	A0A060WZV7	F5BZS8; B9EP57; H2SBN2; B9VJM4; H2L8Q7; A0A146V9Q1; A0A146P9L9; I3IZI3; H2L8Q9; A0A060WZV7; Q4RB38; A0A060YT85; H2L8R0; A0A146ZN37; G3NJM6	1429.33	4285.98	-1.25634	-0.00179488	100	192.71
High	MELQEIQLK	D6PVP3; Q8AV86; Q8JIM7; Q5SPK6; A0A147A2G3; H2SQV9; A0A087YF71; P13104; H2MA79; A0A0F8CF82	H3CSI6; A0A060X0I2; K4PEK4; D6PVP3; H2SQW0; Q805C9; Q803M1; A0A060WLJ6; G1FCF2; A0A0P7WSD3; Q6P0W3; Q8AV86; G3P8Z9; Q5SPK5; F8U085; G3N8Q3; Q8JIM7; H2M5M4; G3PVL2; X2J4M2; Q805D2; I3J2Q1; A5HDK1; Q805D0; W5KS79; I3KDN0; A0A147AVZ3; F5A824; Q5YDG9; H2SQV7; G3P8Z5; H9A6B0; Q8JIM8; A0A146NCI0; Q5SPK6; H2MA80; A0A060WRJ2; H9A690; Q4SAI3; A0A0S7FXE9; I3JVV2; M4AQP3; W5JYT8; H3CEU1; A0A147A2G3; H2SQV9;…	566.308	1131.61	0.444011	0.000251223	100	53.5142
High	LEDEEELNAELTAK		I3KU01; A0A060X652	802.389	1603.77	0.281749	0.00022593	100	53.3294
High	LVIIESDLER	H2LUJ8; Q8AV86; Q8JIM7; A0A147A2G3; H2SQV9; A0A087YEU9; H2MA79	A0A060X0I2; H2SQW0; H2LUJ8; Q805C9; A0A096M4B0; Q8AV86; Q8JIM7; G3PVL2; Q805D0; H2SQV7; H2MA80; Q4SAI3; A0A147A2G3; H2SQV9; A0A087YEU9; A0A146WFT2; A0A060W8G0; B5X4E8; Q91472; M4AS27; H3BYP9; G3PVL1; H2MA79; H2SQV8; A0A146WDB4; H3C0I1; G3PVK9	593.837	1186.67	-0.108735	-6.45161e-05	21.2712	53.161
High	GTEDELDKYSEALK	D6PVP3; H2LUJ8; Q8AV86; A0A0F8AT58; A0A146W5Y8; A0A0S7K258; A0A147A2G3; A0A087YF71; E3TFQ0; A0A0F8CF82	A0A0S7K1B6; K4PEK4; D6PVP3; H2LUJ8; G1FCF2; Q6P0W3; A0A060WR17; Q8AV86; G3P8Z9; F8U085; G3N8Q3; X2J4M2; A0A146ZYU7; A0A146W5S1; A0A146W5R6; F6NVA3; A5WW36; A0A0F8AT58; I3KDN0; A0A147AVZ3; Q91489; E7FBZ3; G3P8Z5; B9EMY1; A0A146NCI0; Q91490; A0A146W5Y8; A0A146W2Z9; A0A0S7K258; M4AQP3; A0A147A2G3; A0A087YF71; A0A0S7MHR3; I3ISQ1; A0A087XA45; Q805C6; A0A0P7WKP3; Q76CT4; Q7ZVK9; A0A060WCS0; A0A0P7YL18;…	533.257	1597.76	-1.09733	-0.000584425	34.9709	53.17
High	LEDEEEINAELTAK	B1Q382; G9M5T1; A0A087XQZ5; T2HFG0; B3DJM6; H2UN88; C0STL2; P87344; Q05K06; B1Q385; A0A0F8CGF3; A0A146UU13; H3DR28	A0A146QK60; M3ZV86; A8R0Q2; Q05K05; H2LNV3; B1Q382; Q789E7; F1R6C7; H3CNF0; H3CMX1; Q90YF6; C4TIP2; A0A146UU32; A0A147A0M4; Q05K11; C4TIP3; A0A146Q5H9; Q2PMW9; A0A060XH29; A0A0S7IMH6; M3ZPQ1; A0A146UV76; A8R0Q7; Q4RXH7; A0A146RH13; B1PF34; H3DB42; A0A146RQV8; A0A146W7Q2; H3BX59; G3NEX9; A0A0F8BDK2; A0A146W4J3; G9M5T1; A0A147B5U4; A0A087XQZ5; A0A146UU29; A0A146Y740; Q90337; A0A146Y8S1; C4TIP1; A0A…	802.389	1603.77	0.281749	0.00022593	100	53.3294
High	LEDEEELNAELTAK		I3KU01; A0A060X652	802.388	1603.77	-0.555512	-0.000445457	100	53.3684
High	LEDEEEINAELTAK	B1Q382; G9M5T1; A0A087XQZ5; T2HFG0; B3DJM6; H2UN88; C0STL2; P87344; Q05K06; B1Q385; A0A0F8CGF3; A0A146UU13; H3DR28	A0A146QK60; M3ZV86; A8R0Q2; Q05K05; H2LNV3; B1Q382; Q789E7; F1R6C7; H3CNF0; H3CMX1; Q90YF6; C4TIP2; A0A146UU32; A0A147A0M4; Q05K11; C4TIP3; A0A146Q5H9; Q2PMW9; A0A060XH29; A0A0S7IMH6; M3ZPQ1; A0A146UV76; A8R0Q7; Q4RXH7; A0A146RH13; B1PF34; H3DB42; A0A146RQV8; A0A146W7Q2; H3BX59; G3NEX9; A0A0F8BDK2; A0A146W4J3; G9M5T1; A0A147B5U4; A0A087XQZ5; A0A146UU29; A0A146Y740; Q90337; A0A146Y8S1; C4TIP1; A0A…	802.388	1603.77	-0.555512	-0.000445457	100	53.3684
High	MEIQEIQLK	A0A146W5Y8; A0A0S7K258; E3TFQ0	A0A0S7K1B6; A0A146MW79; A0A146ZYU7; A0A146W5S1; E2FWP5; A0A146W5R6; F6NVA3; A7WTZ1; F6P435; E7FBZ3; Q6NYQ0; A0A146W5Y8; A0A146W2Z9; A0A0S7K258; A7E2K1; G8JCI4; Q7SXW1; E2IJC8; A0A146MYM3; A0A087XA45; Q7ZVK9; A0A146P5S8; G8JCL1; A0A146W620; Q66LG2; A0A146MVQ5; E3TFQ0; W5JZC9	566.308	1131.61	0.444011	0.000251223	100	53.5142
High	LVIIESDLER	H2LUJ8; Q8AV86; Q8JIM7; A0A147A2G3; H2SQV9; A0A087YEU9; H2MA79	A0A060X0I2; H2SQW0; H2LUJ8; Q805C9; A0A096M4B0; Q8AV86; Q8JIM7; G3PVL2; Q805D0; H2SQV7; H2MA80; Q4SAI3; A0A147A2G3; H2SQV9; A0A087YEU9; A0A146WFT2; A0A060W8G0; B5X4E8; Q91472; M4AS27; H3BYP9; G3PVL1; H2MA79; H2SQV8; A0A146WDB4; H3C0I1; G3PVK9	593.837	1186.67	-0.417339	-0.000247622	17.149	53.2084
High	LEDEEEINAELTAK	B1Q382; G9M5T1; A0A087XQZ5; T2HFG0; B3DJM6; H2UN88; C0STL2; P87344; Q05K06; B1Q385; A0A0F8CGF3; A0A146UU13; H3DR28	A0A146QK60; M3ZV86; A8R0Q2; Q05K05; H2LNV3; B1Q382; Q789E7; F1R6C7; H3CNF0; H3CMX1; Q90YF6; C4TIP2; A0A146UU32; A0A147A0M4; Q05K11; C4TIP3; A0A146Q5H9; Q2PMW9; A0A060XH29; A0A0S7IMH6; M3ZPQ1; A0A146UV76; A8R0Q7; Q4RXH7; A0A146RH13; B1PF34; H3DB42; A0A146RQV8; A0A146W7Q2; H3BX59; G3NEX9; A0A0F8BDK2; A0A146W4J3; G9M5T1; A0A147B5U4; A0A087XQZ5; A0A146UU29; A0A146Y740; Q90337; A0A146Y8S1; C4TIP1; A0A…	802.388	1603.77	-0.403283	-0.000323386	100	53.2286
High	LEDEEEINAELTAK	B1Q382; G9M5T1; A0A087XQZ5; T2HFG0; B3DJM6; H2UN88; C0STL2; P87344; Q05K06; B1Q385; A0A0F8CGF3; A0A146UU13; H3DR28	A0A146QK60; M3ZV86; A8R0Q2; Q05K05; H2LNV3; B1Q382; Q789E7; F1R6C7; H3CNF0; H3CMX1; Q90YF6; C4TIP2; A0A146UU32; A0A147A0M4; Q05K11; C4TIP3; A0A146Q5H9; Q2PMW9; A0A060XH29; A0A0S7IMH6; M3ZPQ1; A0A146UV76; A8R0Q7; Q4RXH7; A0A146RH13; B1PF34; H3DB42; A0A146RQV8; A0A146W7Q2; H3BX59; G3NEX9; A0A0F8BDK2; A0A146W4J3; G9M5T1; A0A147B5U4; A0A087XQZ5; A0A146UU29; A0A146Y740; Q90337; A0A146Y8S1; C4TIP1; A0A…	802.388	1603.77	-0.403283	-0.000323386	100	53.2613
High	LEDEEELNAELTAK		I3KU01; A0A060X652	802.388	1603.77	-0.403283	-0.000323386	100	53.2286
High	MEIQELQLK		Q805C3; A0A0S7FL43; A0A087X6Z2; A0A146WA78; A0A146WCY3; Q91489; A0A146WD86; H3BWT4; A0A096M9U2; Q4RWQ5; H2TMU3; Q805C2; A0A096MBU4; M3ZEK9; A0A0S7FMG7	566.308	1131.61	0.444011	0.000251223	100	53.5142
High	LEDEEELNAELTAK		I3KU01; A0A060X652	802.388	1603.77	-0.403283	-0.000323386	100	53.2613
High	LNFDAFLPMLK	B9V2Y1	B6VCB3; H2TBH9; A0A146SAL6; Q4SMB6; I3K6V3; A0A0S7MDP0; B7U3X5; B9V2Y1; F2WR27; A0A147A177; H2LAV5; H3CSC1; A0A146P771; A0A087Y5E6; A0A147A2F8; P82160; A0A096MH75; Q90W40	654.853	1308.7	-2.78474	-0.0018222	100	85.4388
High	LDEAENLAMK	B1Q382; A0A087XQZ5; T2HFG0; B3DJM6; W5L2L4; H2UN88; Q8JIP5; A0A0F8C3K6; P87344; Q05K06; B1Q385; D6PVQ0; A0A060Y971; Q98TQ5; H3DR28	A7M6P0; H3CMS0; Q05K05; H2LNV3; B1Q382; G3N9L2; F1R6C7; F4ZQR5; C0STL4; H3CMX1; Q90YF6; C4TIP2; A0A147A0M4; Q05K11; A0A087YKG8; H2UKT9; C4TIP3; A7M6P1; A0A146Q5H9; Q2PMW9; A0A060XH29; M3ZPQ1; A8R0Q7; Q4RXH7; A0A146RH13; H2SKR3; H3DB42; A0A060YBV0; A0A060YS70; H3CNI4; H3BX59; A0A146W4J3; A0A0S7JAN2; A7M6P2; Q91208; A0A060Y5W1; A0A087XQZ5; A0A146Y740; A0A146Y8S1; C4TIP1; A0A060XRS6; A0A146Y712; H2S…	567.278	1133.55	-1.8252	-0.00103448	100	31.8996
High	AADAESDVASLNR	Q8AV86	Q8AV86	659.815	1318.62	-0.5626	-0.000370929	100	43.0837
High	LAMQEFMILPVGAANFHEAMR	A0A0E9XJJ3	A0A0P7UEW6; F5BZS7; A0A0E9XJJ3; G3N816; A0A0F8AN77; D6PVP1; H2RQ53; Q4TBD1; H3CAK5	792.725	2376.16	-2.03499	-0.00161183	34.7297	83.4571
High	LDEAENLAMK	B1Q382; A0A087XQZ5; T2HFG0; B3DJM6; W5L2L4; H2UN88; Q8JIP5; A0A0F8C3K6; P87344; Q05K06; B1Q385; D6PVQ0; A0A060Y971; Q98TQ5; H3DR28	A7M6P0; H3CMS0; Q05K05; H2LNV3; B1Q382; G3N9L2; F1R6C7; F4ZQR5; C0STL4; H3CMX1; Q90YF6; C4TIP2; A0A147A0M4; Q05K11; A0A087YKG8; H2UKT9; C4TIP3; A7M6P1; A0A146Q5H9; Q2PMW9; A0A060XH29; M3ZPQ1; A8R0Q7; Q4RXH7; A0A146RH13; H2SKR3; H3DB42; A0A060YBV0; A0A060YS70; H3CNI4; H3BX59; A0A146W4J3; A0A0S7JAN2; A7M6P2; Q91208; A0A060Y5W1; A0A087XQZ5; A0A146Y740; A0A146Y8S1; C4TIP1; A0A060XRS6; A0A146Y712; H2S…	567.279	1133.55	0.436257	0.00024726	100	31.7938
High	VAEQELVDASER	G9M5T1; A0A087XQZ5; T2HFG0; B3DJM6; W5L2L4; H2UN88; C0STL2; A0A0F8C3K6; P87344; Q05K06; D6PVQ0; A0A0F8CGF3; H3DR28; Q33BP2	H3CMS0; A0A146QK60; M3ZV86; A8R0Q2; Q05K05; H2LNV3; Q789E7; G3N9L2; F1R6C7; C0STL4; H3CMX1; Q90YF6; A0A147A0M4; Q05K11; A0A087YKG8; A0A146Q5H9; A0A0F8C274; M3ZPQ1; Q4RXH7; H3DB42; A0A146RQV8; H3CNI4; H3BX59; A0A146W4J3; A0A0S7JAN2; G9M5T1; A0A087XQZ5; A0A0S7K7R5; A0A146Y740; Q90337; Q91520; C4TIP1; Q98TQ4; A0A146U920; Q508P7; A0A146SGF7; A4GWV4; H2ULB1; T2HFG0; I3IZY8; Q90339; Q4RXH2; Q9IBD7; Q05…	673.334	1345.66	0.41653	0.000280254	100	44.0458
High	RVDFEGFLPMMQTIVNSPNK	Q9IB19	Q9IB19	775.059	2323.16	2.54319	0.00196941	39.2814	82.9022
High	KLVILEGDLER	A0A147AWH1; A0A0S7K258; A0A087XSB4	A0A0S7FPU0; A0A146YIJ7; Q4TI88; B9ELP6; A0A0S7FL43; Q805C7; Q4T142; H2TYG2; B5X1U5; H3C7I0; A0A060WSI3; A0A087X6Z2; H2TYG5; A0A096LSJ0; G3Q408; A0A146WA78; Q805C8; H2MRC9; A0A146WCY3; A0A147A1D8; H2TYG4; A0A146WD86; A0A096M9U2; A0A147AWH1; A0A096MBU4; A0A0S7K258; M3ZMF1; A0A087XSB4; A0A146YIN5; H2MCV5; H3CHP2; M3ZEK9; M3ZZE4; G3Q407; G8G913; A0A146YII9; G3Q402; H3DQ51; W5KTD3; A0A146YIL1; G3Q3Z9;…	428.922	1284.75	-1.502	-0.000643232	100	52.7316
High	IEELEEELEAER	A0A060VYS1; A0A146UU13	A0A0S7G0W1; A0A0N8JYG6; A0A146TVH6; A0A146YAN3; A0A146UU32; A0A146UV76; A0A0S7I064; A0A0S7FZ99; A0A060YPQ8; G3PQ58; M3ZVQ6; A0A146UU29; A0A146UU23; E9QF07; A0A146UU19; A0A0R4IVW7; A0A146UUA7; A0A060WTP0; A0A0P7YUT3; A0A0F8C5Q7; A0A0F8AU90; A0A146UVS4; W5KRZ6; W5L0R5; A0A146PH08; Q508P8; H2MDC8; E6ZIC7; Q4T6T1; A0A146UUJ4; H3C1R4; A0A0R4INI3; A0A0G2L354; A0A146UV67; W5U761; A8WBZ8; A0A0S7I061; A0A…	744.857	1488.71	0.696034	0.000518095	100	54.518
High	INFDAFLPMLK		A0A0F8AVT1; Q9IB29	654.855	1308.7	0.38664	0.000252999	33.025	82.2237
High	LNFDAFLPMLK	B9V2Y1	B6VCB3; H2TBH9; A0A146SAL6; Q4SMB6; I3K6V3; A0A0S7MDP0; B7U3X5; B9V2Y1; F2WR27; A0A147A177; H2LAV5; H3CSC1; A0A146P771; A0A087Y5E6; A0A147A2F8; P82160; A0A096MH75; Q90W40	654.855	1308.7	0.38664	0.000252999	33.025	82.2237
High	LDEAENLAMK	B1Q382; A0A087XQZ5; T2HFG0; B3DJM6; W5L2L4; H2UN88; Q8JIP5; A0A0F8C3K6; P87344; Q05K06; B1Q385; D6PVQ0; A0A060Y971; Q98TQ5; H3DR28	A7M6P0; H3CMS0; Q05K05; H2LNV3; B1Q382; G3N9L2; F1R6C7; F4ZQR5; C0STL4; H3CMX1; Q90YF6; C4TIP2; A0A147A0M4; Q05K11; A0A087YKG8; H2UKT9; C4TIP3; A7M6P1; A0A146Q5H9; Q2PMW9; A0A060XH29; M3ZPQ1; A8R0Q7; Q4RXH7; A0A146RH13; H2SKR3; H3DB42; A0A060YBV0; A0A060YS70; H3CNI4; H3BX59; A0A146W4J3; A0A0S7JAN2; A7M6P2; Q91208; A0A060Y5W1; A0A087XQZ5; A0A146Y740; A0A146Y8S1; C4TIP1; A0A060XRS6; A0A146Y712; H2S…	567.279	1133.55	-0.532939	-0.000302057	100	31.6886
High	VAEQELVDASER	G9M5T1; A0A087XQZ5; T2HFG0; B3DJM6; W5L2L4; H2UN88; C0STL2; A0A0F8C3K6; P87344; Q05K06; D6PVQ0; A0A0F8CGF3; H3DR28; Q33BP2	H3CMS0; A0A146QK60; M3ZV86; A8R0Q2; Q05K05; H2LNV3; Q789E7; G3N9L2; F1R6C7; C0STL4; H3CMX1; Q90YF6; A0A147A0M4; Q05K11; A0A087YKG8; A0A146Q5H9; A0A0F8C274; M3ZPQ1; Q4RXH7; H3DB42; A0A146RQV8; H3CNI4; H3BX59; A0A146W4J3; A0A0S7JAN2; G9M5T1; A0A087XQZ5; A0A0S7K7R5; A0A146Y740; Q90337; Q91520; C4TIP1; Q98TQ4; A0A146U920; Q508P7; A0A146SGF7; A4GWV4; H2ULB1; T2HFG0; I3IZY8; Q90339; Q4RXH2; Q9IBD7; Q05…	673.332	1345.66	-1.76061	-0.00118459	100	31.2067
High	INFDAFLPMLK		A0A0F8AVT1; Q9IB29	654.853	1308.7	-2.78474	-0.0018222	100	85.4388
High	IEELEEEIEAER	B1Q382; G9M5T1; A0A087XQZ5; T2HFG0; B3DJM6; W5L2L4; H2UN88; Q8JIP5; C0STL2; P87344; Q05K06; B1Q385; A0A060Y971; Q98TQ5; H3DR28	A0A146QK60; A8R0Q2; Q05K05; H2LNV3; G3N9L7; B1Q382; Q789E7; G3N9L2; F1R6C7; H3CNF0; H3CMX1; Q90YF6; C4TIP2; A0A147A0M4; Q05K11; A0A087YKG8; C4TIP3; A0A0S7LIY8; A0A146Q5H9; Q2PMW9; A0A060XH29; M3ZPQ1; A8R0Q7; Q4RXH7; A0A146RH13; B1PF34; H3DB42; A0A146RQV8; A0A060YBV0; A0A146W7Q2; H3BX59; A0A0F8BDK2; A0A146W4J3; G9M5T1; A0A0F8CX77; A0A060Y5W1; A0A087XQZ5; A0A146Y740; Q90337; A0A146Y8S1; C4TIP1; A0A…	744.857	1488.71	0.696034	0.000518095	100	54.518
High	VAEQELVDASER	G9M5T1; A0A087XQZ5; T2HFG0; B3DJM6; W5L2L4; H2UN88; C0STL2; A0A0F8C3K6; P87344; Q05K06; D6PVQ0; A0A0F8CGF3; H3DR28; Q33BP2	H3CMS0; A0A146QK60; M3ZV86; A8R0Q2; Q05K05; H2LNV3; Q789E7; G3N9L2; F1R6C7; C0STL4; H3CMX1; Q90YF6; A0A147A0M4; Q05K11; A0A087YKG8; A0A146Q5H9; A0A0F8C274; M3ZPQ1; Q4RXH7; H3DB42; A0A146RQV8; H3CNI4; H3BX59; A0A146W4J3; A0A0S7JAN2; G9M5T1; A0A087XQZ5; A0A0S7K7R5; A0A146Y740; Q90337; Q91520; C4TIP1; Q98TQ4; A0A146U920; Q508P7; A0A146SGF7; A4GWV4; H2ULB1; T2HFG0; I3IZY8; Q90339; Q4RXH2; Q9IBD7; Q05…	673.333	1345.66	-0.581325	-0.000391133	100	37.5559
High	GTLDDYVEGLR	Q9IB19	A0A060YVD3; B5DGT3; Q90WC6; B5DGT2; Q9IB19	619.306	1237.61	-0.611683	-0.000378511	89.8811	57.6824
High	AVTISDVITSMASK	P98093	P98093	711.88	1422.75	1.31885	0.000938198	59.5774	67.0792
High	QSEEAEEQANSYLSK	P87344	P87344	856.886	1712.76	1.68035	0.00143902	100	36.4812
High	VAEQELVDASER	G9M5T1; A0A087XQZ5; T2HFG0; B3DJM6; W5L2L4; H2UN88; C0STL2; A0A0F8C3K6; P87344; Q05K06; D6PVQ0; A0A0F8CGF3; H3DR28; Q33BP2	H3CMS0; A0A146QK60; M3ZV86; A8R0Q2; Q05K05; H2LNV3; Q789E7; G3N9L2; F1R6C7; C0STL4; H3CMX1; Q90YF6; A0A147A0M4; Q05K11; A0A087YKG8; A0A146Q5H9; A0A0F8C274; M3ZPQ1; Q4RXH7; H3DB42; A0A146RQV8; H3CNI4; H3BX59; A0A146W4J3; A0A0S7JAN2; G9M5T1; A0A087XQZ5; A0A0S7K7R5; A0A146Y740; Q90337; Q91520; C4TIP1; Q98TQ4; A0A146U920; Q508P7; A0A146SGF7; A4GWV4; H2ULB1; T2HFG0; I3IZY8; Q90339; Q4RXH2; Q9IBD7; Q05…	673.334	1345.66	0.325816	0.000219219	100	45.0055
High	AADAESDVASLNR	Q8AV86	Q8AV86	659.815	1318.62	-0.470026	-0.000309894	100	30.356
High	AADAESDVASLNR	Q8AV86	Q8AV86	659.815	1318.62	0.270567	0.000178388	100	36.7079
High	GTLDDYVEGLR	Q9IB19	A0A060YVD3; B5DGT3; Q90WC6; B5DGT2; Q9IB19	619.306	1237.61	-0.513049	-0.000317476	100	57.5855
High	AADAESDVASLNR	Q8AV86	Q8AV86	659.815	1318.62	-0.840322	-0.000554034	100	30.2557
High	AADAESDVASLNR	Q8AV86	Q8AV86	659.815	1318.62	-0.932896	-0.000615069	100	36.5609
High	GTLDDYVEGLR	Q9IB19	A0A060YVD3; B5DGT3; Q90WC6; B5DGT2; Q9IB19	619.306	1237.61	-0.414414	-0.000256441	100	57.5216
High	MEIQELQLK		Q805C3; A0A0S7FL43; A0A087X6Z2; A0A146WA78; A0A146WCY3; Q91489; A0A146WD86; H3BWT4; A0A096M9U2; Q4RWQ5; H2TMU3; Q805C2; A0A096MBU4; M3ZEK9; A0A0S7FMG7	566.307	1131.61	-0.311103	-0.000176023	100	56.7506
High	TIDDLEDELYAQK	D6PVP3; Q8AV86; Q8JIM7; Q5SPK6; H2SQV9; A0A087YEU9; A0A087YF71; P13104; A0A0F8CF82	K4PEK4; A0A060WJN0; D6PVP3; H2SQW0; A0A060WLJ6; H3DQ99; G1FCF2; Q6P0W3; Q8AV86; Q5SPK5; W5K5N7; Q8JIM7; H2M5M4; X2J4M2; I3J2Q1; A0A0P7TWT7; W5KS79; A0A147AVZ3; Q4RB49; A0A146NCI0; Q5SPK6; A0A060WRJ2; Q4SAI3; A0A0S7FXE9; Q91490; I3JVV2; W5JYT8; H2SQV9; A0A087YEU9; A0A087YF71; A0A146WFT2; A0A146YH85; A0A060W8G0; P13104; Q91472; Q805C6; Q76CT4; Q9DEB7; G3PVL1; B9V2W9; A0A060X9W2; A0A0F8CF82; F2WR17;…	776.873	1552.74	0.320588	0.000248894	100	57.3128
High	AITDAAMMSEELK	W5L2L4; A0A0F8C3K6; Q05K06	Q05K07; W5L2L4; A0A0F8C3K6; Q05K06; Q05K12	705.336	1409.66	-0.167217	-0.00011786	100	57.7515
High	EELDEIIEEVDEDGSGTIDFEEFLVMMVR	A0A060WZV7	F5BZS8; B9EP57; H2SBN2; B9VJM4; H2L8Q7; A0A146V9Q1; A0A146P9L9; I3IZI3; H2L8Q9; A0A060WZV7; Q4RB38; A0A060YT85; H2L8R0; A0A146ZN37; G3NJM6	1130.19	3388.55	4.59932	0.00519499	100	183.345
High	LNFDAFLPMLK	B9V2Y1	B6VCB3; H2TBH9; A0A146SAL6; Q4SMB6; I3K6V3; A0A0S7MDP0; B7U3X5; B9V2Y1; F2WR27; A0A147A177; H2LAV5; H3CSC1; A0A146P771; A0A087Y5E6; A0A147A2F8; P82160; A0A096MH75; Q90W40	654.855	1308.7	0.38664	0.000252999	100	85.5612
High	SLILVGLAQNLPDSTLGDLVPLIAEALAMGVK	P21848	P21848; Q03156	1077.95	3231.84	2.71376	0.00292347	48.2783	112.865
High	KLVILEGDLER	A0A147AWH1; A0A0S7K258; A0A087XSB4	A0A0S7FPU0; A0A146YIJ7; Q4TI88; B9ELP6; A0A0S7FL43; Q805C7; Q4T142; H2TYG2; B5X1U5; H3C7I0; A0A060WSI3; A0A087X6Z2; H2TYG5; A0A096LSJ0; G3Q408; A0A146WA78; Q805C8; H2MRC9; A0A146WCY3; A0A147A1D8; H2TYG4; A0A146WD86; A0A096M9U2; A0A147AWH1; A0A096MBU4; A0A0S7K258; M3ZMF1; A0A087XSB4; A0A146YIN5; H2MCV5; H3CHP2; M3ZEK9; M3ZZE4; G3Q407; G8G913; A0A146YII9; G3Q402; H3DQ51; W5KTD3; A0A146YIL1; G3Q3Z9;…	428.922	1284.75	-0.646865	-0.000277021	100	52.8767
High	LDEAENLAMK	B1Q382; A0A087XQZ5; T2HFG0; B3DJM6; W5L2L4; H2UN88; Q8JIP5; A0A0F8C3K6; P87344; Q05K06; B1Q385; D6PVQ0; A0A060Y971; Q98TQ5; H3DR28	A7M6P0; H3CMS0; Q05K05; H2LNV3; B1Q382; G3N9L2; F1R6C7; F4ZQR5; C0STL4; H3CMX1; Q90YF6; C4TIP2; A0A147A0M4; Q05K11; A0A087YKG8; H2UKT9; C4TIP3; A7M6P1; A0A146Q5H9; Q2PMW9; A0A060XH29; M3ZPQ1; A8R0Q7; Q4RXH7; A0A146RH13; H2SKR3; H3DB42; A0A060YBV0; A0A060YS70; H3CNI4; H3BX59; A0A146W4J3; A0A0S7JAN2; A7M6P2; Q91208; A0A060Y5W1; A0A087XQZ5; A0A146Y740; A0A146Y8S1; C4TIP1; A0A060XRS6; A0A146Y712; H2S…	567.279	1133.55	0.759323	0.000430365	100	38.1551
High	LFLQVFSAGAR	P56503	P86758; P86744; P86775; P86771; P86753; P86762; P56503; P86757; P86769	604.842	1208.68	-0.793268	-0.000479403	92.4088	65.9411
High	AFFVIDQDKSGFIEEDELKLFLQVFSAGAR	P56503	P86758; P86775; P86771; P86753; P86762; P56503; P86757; P86769	855.692	3419.75	-1.88165	-0.00160869	81.8287	101.588
High	SGFIEEDELKLFLQVFSAGAR	P56503	P86758; P86775; P86771; P86753; P86762; P56503; P86757; P86769	786.073	2356.2	-5.97552	-0.00469321	66.2887	95.1486
High	AADAESDVASLNR	Q8AV86	Q8AV86	659.815	1318.62	-0.840322	-0.000554034	100	39.9089
High	LDEAENLAMK	B1Q382; A0A087XQZ5; T2HFG0; B3DJM6; W5L2L4; H2UN88; Q8JIP5; A0A0F8C3K6; P87344; Q05K06; B1Q385; D6PVQ0; A0A060Y971; Q98TQ5; H3DR28	A7M6P0; H3CMS0; Q05K05; H2LNV3; B1Q382; G3N9L2; F1R6C7; F4ZQR5; C0STL4; H3CMX1; Q90YF6; C4TIP2; A0A147A0M4; Q05K11; A0A087YKG8; H2UKT9; C4TIP3; A7M6P1; A0A146Q5H9; Q2PMW9; A0A060XH29; M3ZPQ1; A8R0Q7; Q4RXH7; A0A146RH13; H2SKR3; H3DB42; A0A060YBV0; A0A060YS70; H3CNI4; H3BX59; A0A146W4J3; A0A0S7JAN2; A7M6P2; Q91208; A0A060Y5W1; A0A087XQZ5; A0A146Y740; A0A146Y8S1; C4TIP1; A0A060XRS6; A0A146Y712; H2S…	567.278	1133.55	-2.57902	-0.00146172	100	38.0648
High	MLGQNPTREELDEIIEEVDEDGSGTIDFEEFLVMMVR	A0A060WZV7	F5BZS8; B9EP57; H2SBN2; B9VJM4; H2L8Q7; A0A146V9Q1; A0A146P9L9; I3IZI3; H2L8Q9; A0A060WZV7; Q4RB38; A0A060YT85; H2L8R0; A0A146ZN37; G3NJM6	1072.25	4285.99	2.0586	0.00220578	100	179.89
High	LFLQNFGAGAR	L7YEM5	L7YEM5	597.324	1193.64	-1.68981	-0.00100852	82.7512	58.4976
High	QLEDDLVALQK	D6PVP3; Q8AV86; Q8JIM7; Q5SPK6; A0A146W5Y8; A0A0S7K258; A0A147A2G3; H2SQV9; A0A087YEU9; P13104; E3TFQ0; H2MA79	H3CSI6; A0A0S7K1B6; K4PEK4; D6PVP3; H2SQW0; A0A096M4B0; G1FCF2; H3C382; Q8AV86; F8U085; Q8JIM7; X2J4M2; A0A146ZYU7; A0A146W5S1; I3J2Q1; A0A146W5R6; Q805D0; H2SQV7; G3P8Z5; Q8JIM8; Q5SPK6; H2MA80; Q4SAI3; A0A146W5Y8; A0A146W2Z9; A0A0S7K258; W5JYT8; A0A147A2G3; H2SQV9; A0A087YEU9; P13104; B5X4E8; Q91472; A0A087XA45; M4AS27; H3BYP9; Q9DEB7; A0A146W620; E3TFQ0; H2MA79; Q4SM36; W5JZC9; A0A146WDB4	636.345	1271.68	-0.597831	-0.000380126	100	56.2503
High	LVIIESDLER	H2LUJ8; Q8AV86; Q8JIM7; A0A147A2G3; H2SQV9; A0A087YEU9; H2MA79	A0A060X0I2; H2SQW0; H2LUJ8; Q805C9; A0A096M4B0; Q8AV86; Q8JIM7; G3PVL2; Q805D0; H2SQV7; H2MA80; Q4SAI3; A0A147A2G3; H2SQV9; A0A087YEU9; A0A146WFT2; A0A060W8G0; B5X4E8; Q91472; M4AS27; H3BYP9; G3PVL1; H2MA79; H2SQV8; A0A146WDB4; H3C0I1; G3PVK9	593.837	1186.67	-0.417339	-0.000247622	100	56.2887
High	LKGTEDELDKYSEALK	D6PVP3; H2LUJ8; Q8AV86; A0A0F8AT58; A0A146W5Y8; A0A0S7K258; A0A147A2G3; A0A087YF71; E3TFQ0; A0A0F8CF82	A0A0S7K1B6; K4PEK4; D6PVP3; H2LUJ8; G1FCF2; Q6P0W3; A0A060WR17; Q8AV86; G3P8Z9; F8U085; G3N8Q3; X2J4M2; A0A146ZYU7; A0A146W5S1; A0A146W5R6; F6NVA3; A5WW36; A0A0F8AT58; I3KDN0; A0A147AVZ3; E7FBZ3; G3P8Z5; B9EMY1; A0A146NCI0; Q91490; A0A146W5Y8; A0A146W2Z9; A0A0S7K258; M4AQP3; A0A147A2G3; A0A087YF71; A0A0S7MHR3; I3ISQ1; A0A087XA45; Q805C6; A0A0P7WKP3; Q76CT4; Q7ZVK9; A0A0P7YL18; Q9DEB7; A0A146W620;…	460.49	1838.94	0.161886	7.44246e-05	100	52.9812
High	TIDDLEDELYAQK	D6PVP3; Q8AV86; Q8JIM7; Q5SPK6; H2SQV9; A0A087YEU9; A0A087YF71; P13104; A0A0F8CF82	K4PEK4; A0A060WJN0; D6PVP3; H2SQW0; A0A060WLJ6; H3DQ99; G1FCF2; Q6P0W3; Q8AV86; Q5SPK5; W5K5N7; Q8JIM7; H2M5M4; X2J4M2; I3J2Q1; A0A0P7TWT7; W5KS79; A0A147AVZ3; Q4RB49; A0A146NCI0; Q5SPK6; A0A060WRJ2; Q4SAI3; A0A0S7FXE9; Q91490; I3JVV2; W5JYT8; H2SQV9; A0A087YEU9; A0A087YF71; A0A146WFT2; A0A146YH85; A0A060W8G0; P13104; Q91472; Q805C6; Q76CT4; Q9DEB7; G3PVL1; B9V2W9; A0A060X9W2; A0A0F8CF82; F2WR17;…	776.872	1552.74	-0.308342	-0.000239387	81.3939	63.6893
High	QSEEAEEQANSYLSK	P87344	P87344	856.887	1712.77	3.39085	0.00290386	100	37.6695
High	AADAESDVASLNR	Q8AV86	Q8AV86	659.815	1318.62	-0.932896	-0.000615069	100	33.4713
High	IGVDEFGAMIK	A5I874	E1UIZ8; A5I874	590.307	1179.61	-0.712379	-0.000420164	49.8616	63.2312
High	QSEEAEEQANSYLSK	P87344	P87344	856.884	1712.76	0.326197	0.000279349	100	41.404
High	GESGPPGPAGFAGPPGSDGQPGAK	A8QX86	A8QX86; H2MRA6	697.996	2091.97	0.162492	0.00011331	100	54.9843
High	AADAESDVASLNR	Q8AV86	Q8AV86	659.815	1318.62	-0.5626	-0.000370929	100	33.4196
High	TIDDLEDELYAQK	D6PVP3; Q8AV86; Q8JIM7; Q5SPK6; H2SQV9; A0A087YEU9; A0A087YF71; P13104; A0A0F8CF82	K4PEK4; A0A060WJN0; D6PVP3; H2SQW0; A0A060WLJ6; H3DQ99; G1FCF2; Q6P0W3; Q8AV86; Q5SPK5; W5K5N7; Q8JIM7; H2M5M4; X2J4M2; I3J2Q1; A0A0P7TWT7; W5KS79; A0A147AVZ3; Q4RB49; A0A146NCI0; Q5SPK6; A0A060WRJ2; Q4SAI3; A0A0S7FXE9; Q91490; I3JVV2; W5JYT8; H2SQV9; A0A087YEU9; A0A087YF71; A0A146WFT2; A0A146YH85; A0A060W8G0; P13104; Q91472; Q805C6; Q76CT4; Q9DEB7; G3PVL1; B9V2W9; A0A060X9W2; A0A0F8CF82; F2WR17;…	776.872	1552.74	-0.780039	-0.000605598	44.6304	52.7718
High	AADAESDVASLNR	Q8AV86	Q8AV86	659.816	1318.62	0.363141	0.000239423	100	33.37
High	KLVIIEGDLER	D6PVP3; A0A146W5Y8; A0A0F8CF82	H3CSI6; A0A0S7K1B6; A0A0P7V399; K4PEK4; A0A060WJN0; D6PVP3; W5UML0; A0A146MW79; G1FCF2; A0A0P7WSD3; G3P8Z9; F8U085; C0H9C0; X2J4M2; A0A146ZYU7; A0A146W5S1; Q805D2; I3J2Q1; A0A0P7TWT7; A0A146W5R6; I3KDN0; G3P8Z5; Q8JIM8; Q91490; A0A146W5Y8; A0A146W2Z9; H3CEU1; W5KAS6; A0A146MYM3; A0A087XA45; Q805D1; Q76CT4; A0A146P5S8; Q9DEB7; A0A146W620; A0A146MVQ5; B9V2W9; A0A0F8CF82; H2TF14; Q4SM36; H3C493	428.922	1284.75	-1.502	-0.000643232	100	52.7316
High	LQEAEEQIEAVNSK	B1Q382; B3DJM6; W5L2L4; P87344; B1Q385; D6PVQ0; Q98TQ5; A0A0F8CGF3	B1Q382; F1R6C7; C4TIP2; H3CE06; C4TIP3; Q2PMW9; Q4T6M5; H2SKR3; H2SKR2; Q508P7; B8A561; B3DJM6; W5L2L4; A0A0F8ANR8; G3NES6; G3NEV3; Q90ZE5; Q6IQX1; H2S271; Q6QUR8; B1Q383; G3NF36; A0A0F8CAS0; A4PDX4; A2BGX6; G3NEW0; A0A0F8ASB4; I3JYT9; P87344; I3JT59; H2SKR0; B1Q385; Q2HX57; D6PVQ0; A4PDX5; Q4STF9; F1Q5K4; H2MWE2; Q98TQ6; B1Q384; Q2HX58; G3NF22; H3CMS1; A0A0F8B949; B8A568; Q98TQ5; A0A0F8CGF3; B7S…	794.397	1587.79	-0.152375	-0.00012097	100	37.912
High	NLTEEMASQDESVAK	B1Q382; P87344; B1Q385	B1Q382; O93498; B1Q383; P87344; B1Q385; B1Q384; A0A060XZG1	826.374	1651.74	-4.71993	-0.00389807	100	46.913
High	KLVIIEGDLER	D6PVP3; A0A146W5Y8; A0A0F8CF82	H3CSI6; A0A0S7K1B6; A0A0P7V399; K4PEK4; A0A060WJN0; D6PVP3; W5UML0; A0A146MW79; G1FCF2; A0A0P7WSD3; G3P8Z9; F8U085; C0H9C0; X2J4M2; A0A146ZYU7; A0A146W5S1; Q805D2; I3J2Q1; A0A0P7TWT7; A0A146W5R6; I3KDN0; G3P8Z5; Q8JIM8; Q91490; A0A146W5Y8; A0A146W2Z9; H3CEU1; W5KAS6; A0A146MYM3; A0A087XA45; Q805D1; Q76CT4; A0A146P5S8; Q9DEB7; A0A146W620; A0A146MVQ5; B9V2W9; A0A0F8CF82; H2TF14; Q4SM36; H3C493	428.922	1284.75	-0.646865	-0.000277021	100	52.8767
High	AADAESDVASLNR	Q8AV86	Q8AV86	659.815	1318.62	-0.377452	-0.000248858	100	42.9804
High	GADPEDVIVAAFK	Q9DEA8	E3TEI4; Q9DEA8; Q9IB20	666.346	1331.69	0.987429	0.000657472	23.6784	68.0635
High	INFDAFLPMLK		A0A0F8AVT1; Q9IB29	654.855	1308.7	0.38664	0.000252999	100	85.5612
High	KLVIIESDLER	H2LUJ8; Q8AV86; Q8JIM7; A0A147A2G3; H2SQV9; A0A087YEU9; H2MA79	A0A060X0I2; H2SQW0; H2LUJ8; Q805C9; A0A096M4B0; Q8AV86; Q8JIM7; G3PVL2; Q805D0; H2SQV7; H2MA80; Q4SAI3; A0A147A2G3; H2SQV9; A0A087YEU9; A0A146WFT2; A0A060W8G0; B5X4E8; Q91472; M4AS27; H3BYP9; G3PVL1; H2MA79; H2SQV8; A0A146WDB4; H3C0I1; G3PVK9	438.926	1314.76	0.176059	7.71585e-05	100	55.3453
High	MLGQNPTREELDEIIEEVDEDGSGTIDFEEFLVMMVR	A0A060WZV7	F5BZS8; B9EP57; H2SBN2; B9VJM4; H2L8Q7; A0A146V9Q1; A0A146P9L9; I3IZI3; H2L8Q9; A0A060WZV7; Q4RB38; A0A060YT85; H2L8R0; A0A146ZN37; G3NJM6	1072.26	4286	4.22317	0.00452511	66.0352	108.323
High	NLTEEMASQDESVAK	B1Q382; P87344; B1Q385	B1Q382; O93498; B1Q383; P87344; B1Q385; B1Q384; A0A060XZG1	826.376	1651.75	-1.46817	-0.00121252	100	46.8231
High	VFDKDGNGYISAAELR	A0A0F8AUE5	A0A146X7J1; B5XCM2; Q6R520; C1BHV5; H3DI88; A0A146R5I5; G3PGF2; A0A0P7ULQ0; G3P4Z6; Q20AK9; Q4JJ85; A0A060WZJ2; A0A147AAY6; A0A0F8ANM6; A0A060WVU0; X5DD20; I3IXY6; A0A060Y0G1; A0A0P7XGF1; F1C7D1; E3TFE6; C1BXP0; D2KX31; A0A060W7T8; A0A0P7XV73; A0A0P7UK75; H3CDX1; A0A060XPD1; A0A0P7UM01; A0A060WIX3; A0A060XT19; C1BIJ2; G3NDL7; Q7T3T2; A0A146TMD7; M9TJ14; P62150; Q4JJ74; A0A146NRJ8; Q4RN51; A2Q0R2;…	585.629	1754.87	0.471473	0.000275791	84.8688	56.8163
High	MELQEIQLK	D6PVP3; Q8AV86; Q8JIM7; Q5SPK6; A0A147A2G3; H2SQV9; A0A087YF71; P13104; H2MA79; A0A0F8CF82	H3CSI6; A0A060X0I2; K4PEK4; D6PVP3; H2SQW0; Q805C9; Q803M1; A0A060WLJ6; G1FCF2; A0A0P7WSD3; Q6P0W3; Q8AV86; G3P8Z9; Q5SPK5; F8U085; G3N8Q3; Q8JIM7; H2M5M4; G3PVL2; X2J4M2; Q805D2; I3J2Q1; A5HDK1; Q805D0; W5KS79; I3KDN0; A0A147AVZ3; F5A824; Q5YDG9; H2SQV7; G3P8Z5; H9A6B0; Q8JIM8; A0A146NCI0; Q5SPK6; H2MA80; A0A060WRJ2; H9A690; Q4SAI3; A0A0S7FXE9; I3JVV2; M4AQP3; W5JYT8; H3CEU1; A0A147A2G3; H2SQV9;…	566.307	1131.61	-0.311103	-0.000176023	100	56.7506
High	VAEQELVDASER	G9M5T1; A0A087XQZ5; T2HFG0; B3DJM6; W5L2L4; H2UN88; C0STL2; A0A0F8C3K6; P87344; Q05K06; D6PVQ0; A0A0F8CGF3; H3DR28; Q33BP2	H3CMS0; A0A146QK60; M3ZV86; A8R0Q2; Q05K05; H2LNV3; Q789E7; G3N9L2; F1R6C7; C0STL4; H3CMX1; Q90YF6; A0A147A0M4; Q05K11; A0A087YKG8; A0A146Q5H9; A0A0F8C274; M3ZPQ1; Q4RXH7; H3DB42; A0A146RQV8; H3CNI4; H3BX59; A0A146W4J3; A0A0S7JAN2; G9M5T1; A0A087XQZ5; A0A0S7K7R5; A0A146Y740; Q90337; Q91520; C4TIP1; Q98TQ4; A0A146U920; Q508P7; A0A146SGF7; A4GWV4; H2ULB1; T2HFG0; I3IZY8; Q90339; Q4RXH2; Q9IBD7; Q05…	673.332	1345.66	-1.57918	-0.00106252	100	27.948
High	DLSELQGLIDAHFEGR	Q8JJ07	Q8JJ07	600.635	1799.89	-0.478321	-0.000286975	18.3868	73.7551
High	DLSELQGLIDAHFEGR	Q8JJ07	Q8JJ07	600.635	1799.89	-1.59737	-0.000958362	24.3618	73.7084
High	EELDEIIEEVDEDGSGTIDFEEFLVMMVR	A0A060WZV7	F5BZS8; B9EP57; H2SBN2; B9VJM4; H2L8Q7; A0A146V9Q1; A0A146P9L9; I3IZI3; H2L8Q9; A0A060WZV7; Q4RB38; A0A060YT85; H2L8R0; A0A146ZN37; G3NJM6	1130.19	3388.55	4.7074	0.00531706	100	191.766
High	CQVHDLTEDAAGWREIACHADVGR	A0A146MYT8	A0A146MYT8	884.739	2652.2	-0.706084	-0.000624227	100	50.7824
High	LVTWYDNEFGYSNR	Q8AWX8	A0A0R4IGI1; A0A0U2ERZ3; J9TGM4; L7NL90; A0A0P7VZ44; E3TEB6; Q90ZF1; B5DGR2; Q2A665; Q8AWX8; H9B644; Q4SND7; H3CRI0; Q5XJ10; Q90Z48; W5LI76; G3KG80; B5DGR3; A1IGU6; Q155W8; H2S8H3; A4PIV5; B5DGR5; E3TDV1; D6BNU6; A0A060Y387; E3TCG5; E0YDW5; A0A060Y562	882.407	1763.81	2.0994	0.00185147	42.2639	67.8809
High	SGFIEEDELK	A5I873; H2M0U7; A0A0P7XIM1; P02621; H3D5S1; P56503	B6UV98; Q7ZT36; Q8AYB3; P86742; P86758; A0A060YVV4; D3YPP4; E0WD92; D3YPP6; A0A060X5F1; E0WD99; W5ZLY7; P86740; Q6ITV0; P86775; Q3C2C4; B5TTU7; P86771; C3UVG3; I3J1U3; P86743; P05941; Q5IRB2; D3YPP1; Q8UUS2; E3TBW7; W5KKR2; A5YVT7; Q91483; P09227; I3KV10; C6GKU3; I3KV11; A5I873; C0LEL6; W5ZLY9; C0LEL8; H2M0U7; Q90YL0; C0LEL4; A0A0P7XIM1; P02621; W5KKQ1; R9R015; P86753; D2KQG1; G8GWA2; Q4S4I4; Q6B…	583.782	1166.56	-0.642674	-0.000374858	100	47.7426
High	ALQESHQQTLDDLQAEEDKVNTLTK	T2HFG0; H2UN88; C0STL2; P87344; Q98TQ5	H3CNF0; T2HFG0; Q4ST82; H2UN88; O93498; C0STL2; Q4SSC8; A0A0F8CAS0; P87344; H3CNI2; Q98TQ6; Q98TQ5; H9LBJ5	714.357	2854.41	-0.288805	-0.000206091	47.5629	61.6628
High	AISEELDHALNDMTSI	D6PVP3; Q8AV86; Q8JIM7; A0A087YEU9; A0A087YF71; P13104; E3TFQ0; H2MA79	H3CSI6; A0A0S7K1B6; K4PEK4; D6PVP3; E3TC29; G1FCF2; Q6P0W3; Q8AV86; Q8JIM7; H2M5M4; X2J4M2; Q805D2; I3J2Q1; A0A146W5R6; F6NVA3; W5KS79; Q8JIM8; A0A146NCI0; A0A0S7FXE9; Q91490; I3JVV2; W5JYT8; A0A087YEU9; A0A087YF71; A0A146WFT2; A0A146YH85; P13104; W5UMT9; A0A087XA45; Q76CT4; Q7ZVK9; Q9DEB7; B9V2W9; E3TFQ0; H2MA79; H2TF14; F2WR17; W5JZC9; H3C493	879.914	1758.82	-0.206268	-0.000181395	10.8704	72.5573
High	AISEELDHALNDMTSL	A0A087XSB4	G3PBG3; H2RS11; A0A146VDU0; H2RS10; I3J232; Q805C5; Q1LXM1; H2MRC9; H2RS09; Q91489; H2RS08; A0A087XSB4; A0A060WIN1; A0A0F8D2I6; A0A146VDT9; F1QKG7	879.914	1758.82	-0.206268	-0.000181395	10.8704	72.5573
High	AISEELDHALNDMTSL	A0A087XSB4	G3PBG3; H2RS11; A0A146VDU0; H2RS10; I3J232; Q805C5; Q1LXM1; H2MRC9; H2RS09; Q91489; H2RS08; A0A087XSB4; A0A060WIN1; A0A0F8D2I6; A0A146VDT9; F1QKG7	879.914	1758.82	0.07135	6.27459e-05	13.3648	72.5218
High	AISEELDHALNDMTSI	D6PVP3; Q8AV86; Q8JIM7; A0A087YEU9; A0A087YF71; P13104; E3TFQ0; H2MA79	H3CSI6; A0A0S7K1B6; K4PEK4; D6PVP3; E3TC29; G1FCF2; Q6P0W3; Q8AV86; Q8JIM7; H2M5M4; X2J4M2; Q805D2; I3J2Q1; A0A146W5R6; F6NVA3; W5KS79; Q8JIM8; A0A146NCI0; A0A0S7FXE9; Q91490; I3JVV2; W5JYT8; A0A087YEU9; A0A087YF71; A0A146WFT2; A0A146YH85; P13104; W5UMT9; A0A087XA45; Q76CT4; Q7ZVK9; Q9DEB7; B9V2W9; E3TFQ0; H2MA79; H2TF14; F2WR17; W5JZC9; H3C493	879.914	1758.82	0.07135	6.27459e-05	13.3648	72.5218
High	AADAESDVASLNR	Q8AV86	Q8AV86	659.815	1318.62	-0.377452	-0.000248858	25.4279	27.1929
High	EELDEIIEEVDEDGSGTIDFEEFLVMMVR	A0A060WZV7	F5BZS8; B9EP57; H2SBN2; B9VJM4; H2L8Q7; A0A146V9Q1; A0A146P9L9; I3IZI3; H2L8Q9; A0A060WZV7; Q4RB38; A0A060YT85; H2L8R0; A0A146ZN37; G3NJM6	1130.19	3388.55	5.03162	0.00568327	100	170.752
High	DIDDLELTIAK		W5KA98; I3JT54	623.331	1245.66	-1.56782	-0.000976482	100	61.8532
High	NMWSAFPPDVAGNVDYK	I4BZJ0	Q90W42; Q8JH57; Q9IB28; Q9IB25; I6U9W3; I4BZJ0; Q90W47	955.939	1910.87	-1.57953	-0.00150914	100	71.9934
High	DIDDLEITLAK		A0A0N8JYG6; H3CE06; Q4T6M5; E7FD18; A0A0F8ANR8; E6ZFS0; A0A060WLI0; H3CPD1; H2TTI0; R4GDZ5; H2TTH9; I3KWT8	623.331	1245.66	-1.56782	-0.000976482	100	61.8532
High	NADGYIDREEFAIIIR	A0A060WZV7	B9EP57; A0A060WZV7; B5DG86; A0A060YT85	632.327	1894.97	0.505121	0.000319062	46.6744	71.4588
High	DLDDLEITLAK		E9QF07; E7F5L1	623.331	1245.66	-1.56782	-0.000976482	100	61.8532
High	DIDDLELTLAK	B1Q382; G9M5T1; A0A087XQZ5; T2HFG0; B3DJM6; A0A060VYS1; Q8JIP5; P87344; Q05K06; B1Q385; A0A060Y971; A0A0F8CGF3; A0A146UU13; H3DR28	A0A146QK60; H3CDY9; A8R0Q2; Q05K05; H2LNV3; B1Q382; Q789E7; A0A0F8AH49; G3N9L2; F1R6C7; H3CNF0; H3CMX1; C4TIP2; Q05K11; C4TIP3; A0A146Q5H9; Q2PMW9; A0A0S7GRP3; A8R0Q7; Q4RXH7; B1PF34; H3DB42; I3KU01; A0A060YPQ8; A0A060YBV0; G3PQ58; H3BW93; A0A146W7Q2; H3BX59; G3NEX9; A0A0F8BDK2; A0A060WL78; G9M5T1; M3ZVQ6; G3PQ45; A0A0F8CX77; A0A060Y5W1; A0A087XQZ5; A0A146UU29; Q90337; C4TIP1; A0A0S7GL70; A0A0R4I…	623.331	1245.66	-1.56782	-0.000976482	100	61.8532
High	DIDDLELTIAK		W5KA98; I3JT54	623.333	1245.66	0.392116	0.000244221	100	61.8933
High	DLDDLEITLAK		E9QF07; E7F5L1	623.333	1245.66	0.392116	0.000244221	100	61.8933
High	DIDDLEITLAK		A0A0N8JYG6; H3CE06; Q4T6M5; E7FD18; A0A0F8ANR8; E6ZFS0; A0A060WLI0; H3CPD1; H2TTI0; R4GDZ5; H2TTH9; I3KWT8	623.333	1245.66	0.392116	0.000244221	100	61.8933
High	AADAESDVASLNR	Q8AV86	Q8AV86	659.815	1318.62	0.270567	0.000178388	24.8162	27.1152
High	DIDDLELTLAK	B1Q382; G9M5T1; A0A087XQZ5; T2HFG0; B3DJM6; A0A060VYS1; Q8JIP5; P87344; Q05K06; B1Q385; A0A060Y971; A0A0F8CGF3; A0A146UU13; H3DR28	A0A146QK60; H3CDY9; A8R0Q2; Q05K05; H2LNV3; B1Q382; Q789E7; A0A0F8AH49; G3N9L2; F1R6C7; H3CNF0; H3CMX1; C4TIP2; Q05K11; C4TIP3; A0A146Q5H9; Q2PMW9; A0A0S7GRP3; A8R0Q7; Q4RXH7; B1PF34; H3DB42; I3KU01; A0A060YPQ8; A0A060YBV0; G3PQ58; H3BW93; A0A146W7Q2; H3BX59; G3NEX9; A0A0F8BDK2; A0A060WL78; G9M5T1; M3ZVQ6; G3PQ45; A0A0F8CX77; A0A060Y5W1; A0A087XQZ5; A0A146UU29; Q90337; C4TIP1; A0A0S7GL70; A0A0R4I…	623.333	1245.66	0.392116	0.000244221	100	61.8933
High	MEIGLWFK	P85292	P85292	512.27	1023.53	0.0494012	2.52819e-05	83.8299	69.338
High	MEIQEMQLK	A0A0F8AT58; A0A147AWH1; A0A087XSB4	G3PBG3; A0A0S7FPU0; Q805C4; A0A146YIJ7; A0A0R4INL7; A0A0R4IM99; A0A146P4T3; Q4TI88; B9ELP6; H2RS11; Q1LXM2; A0A0E9X8H8; I3KQJ0; Q805C7; Q4T142; A0A146VDU0; H3DDF1; H2TYG2; B5X1U5; H2RS10; H2MUU8; H3C7I0; Q7T3F0; A0A060WSI3; I3J232; Q805C5; H2TYG5; A0A096LSJ0; Q6IQD7; Q1LXM1; G3Q408; Q805C8; H2MRC9; H2RS09; A0A0F8AT58; A0A147A1D8; A0A0R4IMN8; W5L7Y3; H2TYG4; B9EMY1; B5X2S2; I3J233; G3PBG1; H3BZ06;…	575.286	1149.56	0.4373	0.000251352	100	51.5688
High	MELQEMQLK		W5KTD3; A0A0P7UUX9	575.286	1149.56	0.4373	0.000251352	100	51.5688
High	KLVIVEGELER	Q5SPK6; A0A087YF71; P13104; E3TFQ0	E3TC29; Q2I189; Q803M1; Q6P0W3; Q5SPK5; H2M5M4; F6NVA3; W5KS79; A0A147AVZ3; F6P435; E7FBZ3; A0A146NCI0; Q5SPK6; A0A0S7FXE9; I3JVV2; Q6NYQ0; M4AQP3; W5JYT8; A0A087YF71; A0A146YH85; A7E2K1; H2MYN6; P13104; I3ISQ1; Q7ZVK9; E3TFQ0; W5JZC9; H2MYN5	428.922	1284.75	-0.504343	-0.000215985	100	49.329
High	AGDSDGDGAIGVEEWVALVK	P02621	P02621	994.485	1987.96	1.4199	0.00141136	19.8872	74.5651
High	AADAESDVASLNR	Q8AV86	Q8AV86	659.814	1318.62	-1.67349	-0.00110335	100	36.6053
High	SGFLEEDELK		P86432	583.782	1166.56	-0.642674	-0.000374858	100	47.7426
High	SGFIEEDELK	A5I873; H2M0U7; A0A0P7XIM1; P02621; H3D5S1; P56503	B6UV98; Q7ZT36; Q8AYB3; P86742; P86758; A0A060YVV4; D3YPP4; E0WD92; D3YPP6; A0A060X5F1; E0WD99; W5ZLY7; P86740; Q6ITV0; P86775; Q3C2C4; B5TTU7; P86771; C3UVG3; I3J1U3; P86743; P05941; Q5IRB2; D3YPP1; Q8UUS2; E3TBW7; W5KKR2; A5YVT7; Q91483; P09227; I3KV10; C6GKU3; I3KV11; A5I873; C0LEL6; W5ZLY9; C0LEL8; H2M0U7; Q90YL0; C0LEL4; A0A0P7XIM1; P02621; W5KKQ1; R9R015; P86753; D2KQG1; G8GWA2; Q4S4I4; Q6B…	583.782	1166.56	-1.16588	-0.000680034	100	47.8315
High	LTDEEVDEMIR	A0A0F8AUE5	A0A146X7J1; B5XCM2; C1BHV5; Q4T6D9; H3DI88; A0A146R5I5; G3PGF2; A0A0P7ULQ0; G3P4Z6; Q20AK9; A0A060WZJ2; A0A147AAY6; A0A0F8ANM6; A0A060WVU0; A0A147A285; I3IXY6; A0A060Y0G1; A0A0P7XGF1; F1C7D1; E3TFE6; C1BXP0; A0A060W7T8; A0A0P7XV73; A0A0P7UK75; H3CDX1; A0A060XPD1; A0A0P7UM01; A0A060WIX3; A0A060XT19; Q3ZLF2; C1BIJ2; G3NDL7; Q7T3T2; A0A146TMD7; P62150; A0A146NRJ8; Q4RN51; A2Q0R2; C0H8K4; A0A0N8K0M2;…	675.318	1349.63	1.87705	0.00126666	100	54.271
High	SGFLEEDELK		P86432	583.782	1166.56	-1.16588	-0.000680034	100	47.8315
High	LDEAENLAMK	B1Q382; A0A087XQZ5; T2HFG0; B3DJM6; W5L2L4; H2UN88; Q8JIP5; A0A0F8C3K6; P87344; Q05K06; B1Q385; D6PVQ0; A0A060Y971; Q98TQ5; H3DR28	A7M6P0; H3CMS0; Q05K05; H2LNV3; B1Q382; G3N9L2; F1R6C7; F4ZQR5; C0STL4; H3CMX1; Q90YF6; C4TIP2; A0A147A0M4; Q05K11; A0A087YKG8; H2UKT9; C4TIP3; A7M6P1; A0A146Q5H9; Q2PMW9; A0A060XH29; M3ZPQ1; A8R0Q7; Q4RXH7; A0A146RH13; H2SKR3; H3DB42; A0A060YBV0; A0A060YS70; H3CNI4; H3BX59; A0A146W4J3; A0A0S7JAN2; A7M6P2; Q91208; A0A060Y5W1; A0A087XQZ5; A0A146Y740; A0A146Y8S1; C4TIP1; A0A060XRS6; A0A146Y712; H2S…	567.279	1133.55	-0.317562	-0.000179986	100	28.5773
High	EAFSLFDKDGDGTITTK	A0A0F8AUE5	A0A0S7GI55; B5XCM2; Q6R520; A0A0B4ZZW5; C1BHV5; H3DI88; A0A146R5I5; G3PGF2; A0A0P7ULQ0; V5TGZ4; G3P4Z6; A0A060WZJ2; A0A147AAY6; A0A0F8ANM6; A0A060WVU0; A0A147A285; I3IXY6; A0A060Y0G1; C1BLP2; A0A0P7XGF1; F1C7D1; E3TFE6; C1BXP0; A0A060W7T8; A0A0P7XV73; A0A0S7GIA7; H3CDX1; A0A060XPD1; A0A0P7UM01; A0A060WIX3; A0A060XT19; C1BIJ2; G3NDL7; Q7T3T2; A0A146TMD7; P62150; A0A146NRJ8; Q4RN51; C0H8K4; A0A0N8K…	615.634	1844.89	-1.90793	-0.00117331	87.8028	61.1705
High	VGLLHSQNTSLLNSK	P87344	I3KU01; A0A060YNF5; P87344; B7SVK2; Q8JIV4	537.633	1610.89	-0.318341	-0.000170937	100	49.3176
High	NMWSAFPPDVAGNVDYK	I4BZJ0	Q90W42; Q8JH57; Q9IB28; Q9IB25; I6U9W3; I4BZJ0; Q90W47	955.941	1910.88	0.464692	0.000443984	81.4959	75.1258
High	MEIQEIQLK	A0A146W5Y8; A0A0S7K258; E3TFQ0	A0A0S7K1B6; A0A146MW79; A0A146ZYU7; A0A146W5S1; E2FWP5; A0A146W5R6; F6NVA3; A7WTZ1; F6P435; E7FBZ3; Q6NYQ0; A0A146W5Y8; A0A146W2Z9; A0A0S7K258; A7E2K1; G8JCI4; Q7SXW1; E2IJC8; A0A146MYM3; A0A087XA45; Q7ZVK9; A0A146P5S8; G8JCL1; A0A146W620; Q66LG2; A0A146MVQ5; E3TFQ0; W5JZC9	566.307	1131.61	-0.311103	-0.000176023	100	56.7506
High	LLALYETISQAMKA	B5XFF2	B5XFF2	776.426	1551.84	-0.440463	-0.000341765	19.2102	76.0192
High	IEELEEEIEAER	B1Q382; G9M5T1; A0A087XQZ5; T2HFG0; B3DJM6; W5L2L4; H2UN88; Q8JIP5; C0STL2; P87344; Q05K06; B1Q385; A0A060Y971; Q98TQ5; H3DR28	A0A146QK60; A8R0Q2; Q05K05; H2LNV3; G3N9L7; B1Q382; Q789E7; G3N9L2; F1R6C7; H3CNF0; H3CMX1; Q90YF6; C4TIP2; A0A147A0M4; Q05K11; A0A087YKG8; C4TIP3; A0A0S7LIY8; A0A146Q5H9; Q2PMW9; A0A060XH29; M3ZPQ1; A8R0Q7; Q4RXH7; A0A146RH13; B1PF34; H3DB42; A0A146RQV8; A0A060YBV0; A0A146W7Q2; H3BX59; A0A0F8BDK2; A0A146W4J3; G9M5T1; A0A0F8CX77; A0A060Y5W1; A0A087XQZ5; A0A146Y740; Q90337; A0A146Y8S1; C4TIP1; A0A…	744.858	1488.71	1.10602	0.000823271	100	54.3828
High	IGVDEFGAMIK	A5I874	E1UIZ8; A5I874	590.308	1179.61	0.322459	0.000190188	100	63.0855
High	AGDSDGDGAIGVEEWVALVK	P02621	P02621	994.485	1987.96	0.928667	0.000923076	15.9008	74.6101
High	AGDSDGDGAIGVEEWAVLVK	A5I873	A5I873	994.485	1987.96	0.928667	0.000923076	15.9008	74.6101
High	VGLLHSQNTSLINSK		Q789E7; Q90337	537.633	1610.89	-0.318341	-0.000170937	100	49.3176
High	IEELEEELEAER	A0A060VYS1; A0A146UU13	A0A0S7G0W1; A0A0N8JYG6; A0A146TVH6; A0A146YAN3; A0A146UU32; A0A146UV76; A0A0S7I064; A0A0S7FZ99; A0A060YPQ8; G3PQ58; M3ZVQ6; A0A146UU29; A0A146UU23; E9QF07; A0A146UU19; A0A0R4IVW7; A0A146UUA7; A0A060WTP0; A0A0P7YUT3; A0A0F8C5Q7; A0A0F8AU90; A0A146UVS4; W5KRZ6; W5L0R5; A0A146PH08; Q508P8; H2MDC8; E6ZIC7; Q4T6T1; A0A146UUJ4; H3C1R4; A0A0R4INI3; A0A0G2L354; A0A146UV67; W5U761; A8WBZ8; A0A0S7I061; A0A…	744.858	1488.71	1.10602	0.000823271	100	54.3828
High	TIDDLEDELYAQK	D6PVP3; Q8AV86; Q8JIM7; Q5SPK6; H2SQV9; A0A087YEU9; A0A087YF71; P13104; A0A0F8CF82	K4PEK4; A0A060WJN0; D6PVP3; H2SQW0; A0A060WLJ6; H3DQ99; G1FCF2; Q6P0W3; Q8AV86; Q5SPK5; W5K5N7; Q8JIM7; H2M5M4; X2J4M2; I3J2Q1; A0A0P7TWT7; W5KS79; A0A147AVZ3; Q4RB49; A0A146NCI0; Q5SPK6; A0A060WRJ2; Q4SAI3; A0A0S7FXE9; Q91490; I3JVV2; W5JYT8; H2SQV9; A0A087YEU9; A0A087YF71; A0A146WFT2; A0A146YH85; A0A060W8G0; P13104; Q91472; Q805C6; Q76CT4; Q9DEB7; G3PVL1; B9V2W9; A0A060X9W2; A0A0F8CF82; F2WR17;…	776.873	1552.74	0.870901	0.00067614	100	57.2784
High	VEIVAINDPFIDLEYMVYMFK	Q8AWX8	C6FGX0; B5B301; C6FGU8; Q5I1Z5; A0A146RLE8; G9J5R6; F5BZT5; B7U6G4; Q8AWX8; I3K556; Q4SND7; S4SRW0; Q3S910; B5SXM1; Q9PTW5; H3CRI0; B8Y1B3; Q98TL7; Q155W8; G3P7L3; G8G8Z6; B5AAJ5; H2S8H3; F6KMK4; A0A142K3N8; A9JPH9; D7RF66; A0A141GF44	850.429	2549.27	0.730727	0.00062094	100	108.992
High	DLDDLEITLAK		E9QF07; E7F5L1	623.332	1245.66	-0.0978673	-6.09545e-05	83.7034	61.9956
High	LDKENAIDR	A0A0F8AT58; A0A147AWH1; A0A087XSB4	G3PBG3; A0A0S7FPU0; A0A146YIJ7; A0A0R4INL7; A0A0R4IM99; A0A146P4T3; Q805C3; B9ELP6; H2RS11; Q805C7; Q4T142; H3DDF1; H2TYG2; B5X1U5; H2RS10; I3J232; Q805C5; A0A087X6Z2; H2TYG5; A0A096LSJ0; Q6IQD7; A0A0F8BET2; A0A146WA78; Q805C8; H2MRC9; H2RS09; A0A0F8AT58; Q91489; W5L7Y3; H2TYG4; B9EMY1; A0A146WD86; Q4RWQ5; B9EPX8; G3PBG1; A0A146QSH5; A0A147AWH1; M3ZMF1; I3K0E5; H2RS08; A0A087XSB4; Q5U3J6; F1R412;…	537.283	1073.56	-0.154544	-8.29559e-05	49.919	26.5896
High	KDIDDLELTLAK	B1Q382; G9M5T1; A0A087XQZ5; T2HFG0; B3DJM6; A0A060VYS1; Q8JIP5; P87344; Q05K06; B1Q385; A0A060Y971; A0A0F8CGF3; A0A146UU13; H3DR28	A0A146QK60; H3CDY9; A8R0Q2; Q05K05; H2LNV3; B1Q382; Q789E7; A0A0F8AH49; G3N9L2; F1R6C7; H3CNF0; H3CMX1; C4TIP2; Q05K11; C4TIP3; A0A146Q5H9; Q2PMW9; A0A0S7GRP3; A8R0Q7; Q4RXH7; B1PF34; H3DB42; I3KU01; A0A060YPQ8; A0A060YBV0; G3PQ58; H3BW93; A0A146W7Q2; H3BX59; G3NEX9; A0A0F8BDK2; A0A060WL78; G9M5T1; M3ZVQ6; G3PQ45; A0A0F8CX77; A0A060Y5W1; A0A087XQZ5; A0A146UU29; Q90337; C4TIP1; A0A0S7GL70; A0A0R4I…	458.588	1373.75	-1.6035	-0.000734269	100	55.6377
High	DIDDLELTIAK		W5KA98; I3JT54	623.332	1245.66	-0.0978673	-6.09545e-05	83.7034	61.9956
High	LDKENALDR	D6PVP3; H2LUJ8; Q5SPK6; A0A146W5Y8; A0A0S7K258; A0A147A2G3; A0A087YEU9; A0A087YF71; P13104; E3TFQ0; H2MA79; A0A0F8CF82	H3CSI6; A0A0S7K1B6; K4PEK4; D6PVP3; E3TC29; H2LUJ8; A0A096M4B0; G1FCF2; H3C901; H3C382; G3P8Z9; F8U085; A0A146ZYU7; A0A146W5S1; Q805D2; I3J2Q1; A0A0P7TWT7; A0A146W5R6; F6NVA3; I3KDN0; A0A147AVZ3; F6P435; E7FBZ3; G3P8Z5; Q8JIM8; Q5SPK6; H2MA80; A0A0P7UPE5; A0A060X1U2; A0A0E9XQC4; Q6NYQ0; A0A146W5Y8; A0A146W2Z9; A0A0S7K258; M4AQP3; W5JYT8; A0A147A2G3; A0A087YEU9; A0A087YF71; A0A0S7MHR3; A0A060W8G0;…	537.283	1073.56	-0.154544	-8.29559e-05	49.919	26.5896
High	LDEAENLAMK	B1Q382; A0A087XQZ5; T2HFG0; B3DJM6; W5L2L4; H2UN88; Q8JIP5; A0A0F8C3K6; P87344; Q05K06; B1Q385; D6PVQ0; A0A060Y971; Q98TQ5; H3DR28	A7M6P0; H3CMS0; Q05K05; H2LNV3; B1Q382; G3N9L2; F1R6C7; F4ZQR5; C0STL4; H3CMX1; Q90YF6; C4TIP2; A0A147A0M4; Q05K11; A0A087YKG8; H2UKT9; C4TIP3; A7M6P1; A0A146Q5H9; Q2PMW9; A0A060XH29; M3ZPQ1; A8R0Q7; Q4RXH7; A0A146RH13; H2SKR3; H3DB42; A0A060YBV0; A0A060YS70; H3CNI4; H3BX59; A0A146W4J3; A0A0S7JAN2; A7M6P2; Q91208; A0A060Y5W1; A0A087XQZ5; A0A146Y740; A0A146Y8S1; C4TIP1; A0A060XRS6; A0A146Y712; H2S…	567.279	1133.55	-0.748316	-0.000424127	100	35.0459
High	KDIDDLEITLAK		A0A0N8JYG6; H3CE06; Q4T6M5; E7FD18; A0A0F8ANR8; E6ZFS0; A0A060WLI0; H3CPD1; H2TTI0; R4GDZ5; H2TTH9; I3KWT8	458.588	1373.75	-1.6035	-0.000734269	100	55.6377
High	DIDDLEITLAK		A0A0N8JYG6; H3CE06; Q4T6M5; E7FD18; A0A0F8ANR8; E6ZFS0; A0A060WLI0; H3CPD1; H2TTI0; R4GDZ5; H2TTH9; I3KWT8	623.332	1245.66	-0.0978673	-6.09545e-05	83.7034	61.9956
High	DIDDLELTLAK	B1Q382; G9M5T1; A0A087XQZ5; T2HFG0; B3DJM6; A0A060VYS1; Q8JIP5; P87344; Q05K06; B1Q385; A0A060Y971; A0A0F8CGF3; A0A146UU13; H3DR28	A0A146QK60; H3CDY9; A8R0Q2; Q05K05; H2LNV3; B1Q382; Q789E7; A0A0F8AH49; G3N9L2; F1R6C7; H3CNF0; H3CMX1; C4TIP2; Q05K11; C4TIP3; A0A146Q5H9; Q2PMW9; A0A0S7GRP3; A8R0Q7; Q4RXH7; B1PF34; H3DB42; I3KU01; A0A060YPQ8; A0A060YBV0; G3PQ58; H3BW93; A0A146W7Q2; H3BX59; G3NEX9; A0A0F8BDK2; A0A060WL78; G9M5T1; M3ZVQ6; G3PQ45; A0A0F8CX77; A0A060Y5W1; A0A087XQZ5; A0A146UU29; Q90337; C4TIP1; A0A0S7GL70; A0A0R4I…	623.332	1245.66	-0.0978673	-6.09545e-05	83.7034	61.9956
High	LFLQNFASGAR	A0A0P7XIM1	A0A0P7XIM1	612.33	1223.65	-1.00449	-0.000614576	58.9674	58.8428
High	LMPIVEIVR	B5XFF2	B5XFF2; O57523; A9Z0V6; P27007	535.326	1069.64	0.259327	0.000138694	98.4479	62.5722
High	VAEQELVDASER	G9M5T1; A0A087XQZ5; T2HFG0; B3DJM6; W5L2L4; H2UN88; C0STL2; A0A0F8C3K6; P87344; Q05K06; D6PVQ0; A0A0F8CGF3; H3DR28; Q33BP2	H3CMS0; A0A146QK60; M3ZV86; A8R0Q2; Q05K05; H2LNV3; Q789E7; G3N9L2; F1R6C7; C0STL4; H3CMX1; Q90YF6; A0A147A0M4; Q05K11; A0A087YKG8; A0A146Q5H9; A0A0F8C274; M3ZPQ1; Q4RXH7; H3DB42; A0A146RQV8; H3CNI4; H3BX59; A0A146W4J3; A0A0S7JAN2; G9M5T1; A0A087XQZ5; A0A0S7K7R5; A0A146Y740; Q90337; Q91520; C4TIP1; Q98TQ4; A0A146U920; Q508P7; A0A146SGF7; A4GWV4; H2ULB1; T2HFG0; I3IZY8; Q90339; Q4RXH2; Q9IBD7; Q05…	673.334	1345.66	0.779387	0.000524395	100	37.6077
High	AISEELDHALNDMTSL	A0A087XSB4	G3PBG3; H2RS11; A0A146VDU0; H2RS10; I3J232; Q805C5; Q1LXM1; H2MRC9; H2RS09; Q91489; H2RS08; A0A087XSB4; A0A060WIN1; A0A0F8D2I6; A0A146VDT9; F1QKG7	879.914	1758.82	-0.622696	-0.000547606	21.915	68.8623
High	AISEELDHALNDMTSI	D6PVP3; Q8AV86; Q8JIM7; A0A087YEU9; A0A087YF71; P13104; E3TFQ0; H2MA79	H3CSI6; A0A0S7K1B6; K4PEK4; D6PVP3; E3TC29; G1FCF2; Q6P0W3; Q8AV86; Q8JIM7; H2M5M4; X2J4M2; Q805D2; I3J2Q1; A0A146W5R6; F6NVA3; W5KS79; Q8JIM8; A0A146NCI0; A0A0S7FXE9; Q91490; I3JVV2; W5JYT8; A0A087YEU9; A0A087YF71; A0A146WFT2; A0A146YH85; P13104; W5UMT9; A0A087XA45; Q76CT4; Q7ZVK9; Q9DEB7; B9V2W9; E3TFQ0; H2MA79; H2TF14; F2WR17; W5JZC9; H3C493	879.914	1758.82	-0.622696	-0.000547606	21.915	68.8623
High	RINFDAFLPMLK		A0A0F8AVT1; Q9IB29	732.904	1464.8	-1.26302	-0.00092504	41.5048	76.7495
High	KDLDDLEITLAK		E9QF07; E7F5L1	458.588	1373.75	-1.6035	-0.000734269	100	55.6377
High	AALNMYIAQVK	B5XFF2	B5XFF2; P27007	611.336	1221.66	-1.55116	-0.000947501	100	57.8474
High	RLNFDAFLPMLK	B9V2Y1	B6VCB3; H2TBH9; A0A146SAL6; Q4SMB6; I3K6V3; A0A0S7MDP0; B7U3X5; B9V2Y1; F2WR27; A0A147A177; H2LAV5; H3CSC1; A0A146P771; A0A087Y5E6; A0A147A2F8; P82160; A0A096MH75; Q90W40	732.904	1464.8	-1.26302	-0.00092504	41.5048	76.7495
High	AAAGDSGSSNVFSMFEQSQIQEYK	F8U029	F8U029	861.053	2581.14	-3.10766	-0.00267378	19.4467	75.2041
High	AGDSDGDGAIGVEEWVALVK	P02621	P02621	994.482	1987.96	-2.01876	-0.00200661	27.9563	77.8846
High	AADAESDVASLNR	Q8AV86	Q8AV86	659.815	1318.62	-0.192304	-0.000126788	100	39.755
High	AADAESDVASLNR	Q8AV86	Q8AV86	659.815	1318.62	-0.377452	-0.000248858	100	43.1362
High	AGDSDGDGAIGVEEWAVLVK	A5I873	A5I873	994.482	1987.96	-2.01876	-0.00200661	27.9563	77.8846
High	SVVLDQANNFQAMTQLVIPEGDHFVDDPKQK	A0A060W1F1; A0A060ZDQ0	A0A060W1F1; A0A060ZDQ0	871.688	3483.73	2.53457	0.00220743	19.5936	79.3194
High	MLGQNPTREELDEIIEEVDEDGSGTIDFEEFLVMMVR	A0A060WZV7	F5BZS8; B9EP57; H2SBN2; B9VJM4; H2L8Q7; A0A146V9Q1; A0A146P9L9; I3IZI3; H2L8Q9; A0A060WZV7; Q4RB38; A0A060YT85; H2L8R0; A0A146ZN37; G3NJM6	1429.33	4285.98	-1.68356	-0.00240523	100	189.557
High	VFEIIDQDK	A5I874	E1UIZ8; A5I874	553.789	1106.57	-1.11643	-0.000617704	100	47.9505
High	LDEAENLAMK	B1Q382; A0A087XQZ5; T2HFG0; B3DJM6; W5L2L4; H2UN88; Q8JIP5; A0A0F8C3K6; P87344; Q05K06; B1Q385; D6PVQ0; A0A060Y971; Q98TQ5; H3DR28	A7M6P0; H3CMS0; Q05K05; H2LNV3; B1Q382; G3N9L2; F1R6C7; F4ZQR5; C0STL4; H3CMX1; Q90YF6; C4TIP2; A0A147A0M4; Q05K11; A0A087YKG8; H2UKT9; C4TIP3; A7M6P1; A0A146Q5H9; Q2PMW9; A0A060XH29; M3ZPQ1; A8R0Q7; Q4RXH7; A0A146RH13; H2SKR3; H3DB42; A0A060YBV0; A0A060YS70; H3CNI4; H3BX59; A0A146W4J3; A0A0S7JAN2; A7M6P2; Q91208; A0A060Y5W1; A0A087XQZ5; A0A146Y740; A0A146Y8S1; C4TIP1; A0A060XRS6; A0A146Y712; H2S…	567.279	1133.55	0.00550345	3.11922e-06	100	28.4336
High	LDEAENLAMK	B1Q382; A0A087XQZ5; T2HFG0; B3DJM6; W5L2L4; H2UN88; Q8JIP5; A0A0F8C3K6; P87344; Q05K06; B1Q385; D6PVQ0; A0A060Y971; Q98TQ5; H3DR28	A7M6P0; H3CMS0; Q05K05; H2LNV3; B1Q382; G3N9L2; F1R6C7; F4ZQR5; C0STL4; H3CMX1; Q90YF6; C4TIP2; A0A147A0M4; Q05K11; A0A087YKG8; H2UKT9; C4TIP3; A7M6P1; A0A146Q5H9; Q2PMW9; A0A060XH29; M3ZPQ1; A8R0Q7; Q4RXH7; A0A146RH13; H2SKR3; H3DB42; A0A060YBV0; A0A060YS70; H3CNI4; H3BX59; A0A146W4J3; A0A0S7JAN2; A7M6P2; Q91208; A0A060Y5W1; A0A087XQZ5; A0A146Y740; A0A146Y8S1; C4TIP1; A0A060XRS6; A0A146Y712; H2S…	567.279	1133.55	0.00550345	3.11922e-06	100	28.6319
High	VFEIIDQDK	A5I874	E1UIZ8; A5I874	553.79	1106.57	-0.0132888	-7.3525e-06	100	47.7481
High	VQLELNQLK		A0A0F8CAB4; A0A087XCJ1; M3ZEU5	542.821	1084.64	-0.384898	-0.000208737	100	48.6418
High	VHLDAITSDDAGNIYAFR	A0A087YCT1	I1SRH7; P79825; A0A087YCT1; Q8JIP9; A0A0S7IE29; Q6PHG2	659.994	1977.97	0.516902	0.000340805	74.5054	66.3652
High	VQLELNQIK	B1Q382; G9M5T1; H2UN88; Q8JIP5; C0STL2; A0A0F8C3K6; P87344; B1Q385; D6PVQ0; A0A060Y971; Q98TQ5; A0A0F8CGF3; A0A146UU13; H3DR28	A0A0S7KB19; B1Q382; H3CMX1; Q90YF6; C4TIP2; C4TIP3; A0A060ZE46; A0A0F8C274; Q2PMW9; H3BX59; G9M5T1; Q91208; A0A146UU29; Q91520; A4GWV4; H3DB41; G0YU48; Q6SNT2; A0A060YNF5; A0A060YKV8; A0A146UUJ4; G3NES6; G3NEV3; A0A060XTA3; A0A060XSP7; H2UN88; Q4SSC7; A0A060YK07; Q4SSC6; H2S271; Q6QUR8; B1Q383; G0YU50; G3NF36; Q8JIP5; C0STL2; A0A0F8CAS0; A0A0F8C3K6; A4PDX4; A0A060YSX7; G3NEW0; P87344; A0A087XBW6;…	542.821	1084.64	-0.384898	-0.000208737	100	48.6418
High	IWHHTFYNELR	Q4SVI6	F4Y565; A0A146S6Z1; A9QUS4; M3ZZR9; A0A0G4AKU0; A0A0P7V8D8; C0LJU8; A3F5U9; D0V739; A0A166T9B6; Q9DDW1; B5U150; P53486; B5SU07; Q0PVE1; Q9PTU4; I3K9Y0; A0A060YV63; Q3B727; F2YI31; D6BL53; H9CDH1; Q6S3E8; H3DJ95; Q7T2J3; S4SF00; M4Q1U6; Q8UVT9; G5CBT1; Q5IGP9; A0A024DD09; A0A0P7ZAK3; Q9PSV5; W5KBE9; F1QC15; H2MSI7; Q4RG96; G0XNZ1; D6NLA5; E6Y295; A0SIJ6; Q8JIZ5; Q9DF40; S4SF40; A0A0P7UGX4; A0A060W…	505.921	1515.75	-1.39492	-0.000704783	100	52.1563
High	NLEVTVKDLQHRLDEAENLAMK	A0A087XQZ5; T2HFG0; B3DJM6; W5L2L4; H2UN88; Q8JIP5; A0A0F8C3K6; P87344; Q05K06; D6PVQ0; A0A060Y971; H3DR28	H3CMS0; Q05K05; H2LNV3; G3N9L2; F4ZQR5; C0STL4; H3CMX1; Q90YF6; A0A147A0M4; Q05K11; A0A087YKG8; H2UKT9; A0A146Q5H9; Q2PMW9; M3ZPQ1; A8R0Q7; Q4RXH7; A0A146RH13; H3DB42; A0A060YBV0; A0A060YS70; H3CNI4; H3BX59; A0A0S7JAN2; A0A060Y5W1; A0A087XQZ5; A0A146Y740; A0A146Y8S1; C4TIP1; A0A060XRS6; A0A146Y712; A0A146U9E3; Q90ZP0; A0A146U920; A0A146SGF7; A4GWV4; H2ULB1; T2HFG0; H3C1A0; I3IZY8; Q4RXH2; Q9IBD7;…	642.337	2566.33	-1.18707	-0.000761602	59.2063	73.3539
High	AADAESDVASLNR	Q8AV86	Q8AV86	659.815	1318.62	-1.02547	-0.000676105	100	39.8067
High	VFEIIDQDK	A5I874	E1UIZ8; A5I874	553.79	1106.57	-0.454544	-0.000251493	100	47.9961
High	LFLQNFSASAR	H3D5S1	D3YPP4; D3YPP6; A0A087Y0Y7; E0WD99; H3D320; H2TLP9; A9ZTF2; Q5IRB2; C0LEK0; P86432; Q91483; I3KV10; I3KV11; Q4S885; G3PES6; W5KKQ1; Q4S4I4; M4AK77; W5ZMY4; Q6B4H7; D3YPP3; A0A060X840; H3D5S1; A0A0P7Y0D7; B5WX08; A0A096M2G1; A0A060WYV9; Q90YK7; C0LEK7; H2V1I8; G3P4E3; C0LEL5	627.335	1253.66	-0.741471	-0.000464777	100	59.0592
High	TIDDLEDELYAQK	D6PVP3; Q8AV86; Q8JIM7; Q5SPK6; H2SQV9; A0A087YEU9; A0A087YF71; P13104; A0A0F8CF82	K4PEK4; A0A060WJN0; D6PVP3; H2SQW0; A0A060WLJ6; H3DQ99; G1FCF2; Q6P0W3; Q8AV86; Q5SPK5; W5K5N7; Q8JIM7; H2M5M4; X2J4M2; I3J2Q1; A0A0P7TWT7; W5KS79; A0A147AVZ3; Q4RB49; A0A146NCI0; Q5SPK6; A0A060WRJ2; Q4SAI3; A0A0S7FXE9; Q91490; I3JVV2; W5JYT8; H2SQV9; A0A087YEU9; A0A087YF71; A0A146WFT2; A0A146YH85; A0A060W8G0; P13104; Q91472; Q805C6; Q76CT4; Q9DEB7; G3PVL1; B9V2W9; A0A060X9W2; A0A0F8CF82; F2WR17;…	776.873	1552.74	0.949517	0.000737175	99.8575	63.7455
High	AADAESDVASLNR	Q8AV86	Q8AV86	659.816	1318.62	0.733437	0.000483563	24.4786	27.0759
High	ALSEELDLALNDMTTL	A0A147AWH1; A0A0S7K258	Q4TI88; B9ELP6; Q4T142; H3C7I0; A0A060WSI3; H2TYG5; Q6IQD7; Q805C8; A0A147AWH1; A0A0S7K258; I3K0E5; A0A146YIN5; H2MCV5; M3ZZE4; G3Q402; H3DQ51; W5KTD3; G3Q3Z9	874.936	1748.86	1.0314	0.00090189	77.0179	86.2863
High	AISEELDHALNDMTSL	A0A087XSB4	G3PBG3; H2RS11; A0A146VDU0; H2RS10; I3J232; Q805C5; Q1LXM1; H2MRC9; H2RS09; Q91489; H2RS08; A0A087XSB4; A0A060WIN1; A0A0F8D2I6; A0A146VDT9; F1QKG7	879.914	1758.82	-0.0674592	-5.93244e-05	34.7178	75.6062
High	TFSSDFEVKEYVLPSFEVSLTPAK	A0A060VZH2	B5AJV0; A0A060VZH2	907.461	2720.37	-0.232741	-0.000211047	100	84.0411
High	AGDSDGDGAIGVEEWVALVK	P02621	P02621	994.487	1987.97	3.13924	0.00312034	31.6969	74.5232
High	LVIIEGDLER	D6PVP3; A0A146W5Y8; A0A0F8CF82	H3CSI6; A0A0S7K1B6; A0A0P7V399; K4PEK4; A0A060WJN0; D6PVP3; W5UML0; A0A146MW79; G1FCF2; A0A0P7WSD3; G3P8Z9; F8U085; C0H9C0; X2J4M2; A0A146ZYU7; A0A146W5S1; Q805D2; I3J2Q1; A0A0P7TWT7; A0A146W5R6; I3KDN0; G3P8Z5; Q8JIM8; Q91490; A0A146W5Y8; A0A146W2Z9; H3CEU1; W5KAS6; A0A146MYM3; A0A087XA45; Q805D1; Q76CT4; A0A146P5S8; Q9DEB7; A0A146W620; A0A146MVQ5; B9V2W9; A0A0F8CF82; H2TF14; Q4SM36; H3C493	578.832	1156.66	-0.898262	-0.000519491	100	55.3854
High	LVILEGDLER	A0A147AWH1; A0A0S7K258; A0A087XSB4	A0A0S7FPU0; A0A146YIJ7; Q4TI88; B9ELP6; A0A0S7FL43; Q805C7; Q4T142; H2TYG2; B5X1U5; H3C7I0; A0A060WSI3; A0A087X6Z2; H2TYG5; A0A096LSJ0; G3Q408; A0A146WA78; Q805C8; H2MRC9; A0A146WCY3; A0A147A1D8; H2TYG4; A0A146WD86; A0A096M9U2; A0A147AWH1; A0A096MBU4; A0A0S7K258; M3ZMF1; A0A087XSB4; A0A146YIN5; H2MCV5; H3CHP2; M3ZEK9; M3ZZE4; G3Q407; G8G913; A0A146YII9; G3Q402; H3DQ51; W5KTD3; A0A146YIL1; G3Q3Z9;…	578.832	1156.66	-0.898262	-0.000519491	100	55.3854
High	LVYEISVRHPESSQQVILR	P21848	P21848; Q03156	564.063	2253.23	-1.83511	-0.00103373	100	61.1765
High	RPADPSSASSSGGPPEKR	Q4RZA9	Q4RZA9; Q4THB0; H3C7W2	594.962	1782.87	-1.27569	-0.00075813	49.2306	51.6616
High	QAITQQIEELKR	A0A0F8CGF3	A0A0F8CGF7; A0A0F8CGF3	486.275	1456.81	-0.576433	-0.000279918	100	49.1279
High	AISEELDHALNDMTSI	D6PVP3; Q8AV86; Q8JIM7; A0A087YEU9; A0A087YF71; P13104; E3TFQ0; H2MA79	H3CSI6; A0A0S7K1B6; K4PEK4; D6PVP3; E3TC29; G1FCF2; Q6P0W3; Q8AV86; Q8JIM7; H2M5M4; X2J4M2; Q805D2; I3J2Q1; A0A146W5R6; F6NVA3; W5KS79; Q8JIM8; A0A146NCI0; A0A0S7FXE9; Q91490; I3JVV2; W5JYT8; A0A087YEU9; A0A087YF71; A0A146WFT2; A0A146YH85; P13104; W5UMT9; A0A087XA45; Q76CT4; Q7ZVK9; Q9DEB7; B9V2W9; E3TFQ0; H2MA79; H2TF14; F2WR17; W5JZC9; H3C493	879.914	1758.82	-0.0674592	-5.93244e-05	34.7178	75.6062
High	AADAESDVASLNR	Q8AV86	Q8AV86	659.816	1318.62	0.363141	0.000239423	100	43.1821
High	LISWYDNEFGYSNR	A0A0N8K1A8	A0A0N8K1A8	882.407	1763.81	2.0994	0.00185147	42.2639	67.8809
High	TFSSDFEVKEYVLPSFEVSLTPAK	A0A060VZH2	B5AJV0; A0A060VZH2	907.464	2720.38	2.59424	0.00235243	63.8156	83.9065
High	AISEELDHALNDMTSL	A0A087XSB4	G3PBG3; H2RS11; A0A146VDU0; H2RS10; I3J232; Q805C5; Q1LXM1; H2MRC9; H2RS09; Q91489; H2RS08; A0A087XSB4; A0A060WIN1; A0A0F8D2I6; A0A146VDT9; F1QKG7	879.914	1758.82	-0.136864	-0.00012036	18.0155	72.4818
High	IWHHTFYNELR	Q4SVI6	F4Y565; A0A146S6Z1; A9QUS4; M3ZZR9; A0A0G4AKU0; A0A0P7V8D8; C0LJU8; A3F5U9; D0V739; A0A166T9B6; Q9DDW1; B5U150; P53486; B5SU07; Q0PVE1; Q9PTU4; I3K9Y0; A0A060YV63; Q3B727; F2YI31; D6BL53; H9CDH1; Q6S3E8; H3DJ95; Q7T2J3; S4SF00; M4Q1U6; Q8UVT9; G5CBT1; Q5IGP9; A0A024DD09; A0A0P7ZAK3; Q9PSV5; W5KBE9; F1QC15; H2MSI7; Q4RG96; G0XNZ1; D6NLA5; E6Y295; A0SIJ6; Q8JIZ5; Q9DF40; S4SF40; A0A0P7UGX4; A0A060W…	505.92	1515.75	-1.57612	-0.000796336	100	52.1222
High	LDEAENLAMK	B1Q382; A0A087XQZ5; T2HFG0; B3DJM6; W5L2L4; H2UN88; Q8JIP5; A0A0F8C3K6; P87344; Q05K06; B1Q385; D6PVQ0; A0A060Y971; Q98TQ5; H3DR28	A7M6P0; H3CMS0; Q05K05; H2LNV3; B1Q382; G3N9L2; F1R6C7; F4ZQR5; C0STL4; H3CMX1; Q90YF6; C4TIP2; A0A147A0M4; Q05K11; A0A087YKG8; H2UKT9; C4TIP3; A7M6P1; A0A146Q5H9; Q2PMW9; A0A060XH29; M3ZPQ1; A8R0Q7; Q4RXH7; A0A146RH13; H2SKR3; H3DB42; A0A060YBV0; A0A060YS70; H3CNI4; H3BX59; A0A146W4J3; A0A0S7JAN2; A7M6P2; Q91208; A0A060Y5W1; A0A087XQZ5; A0A146Y740; A0A146Y8S1; C4TIP1; A0A060XRS6; A0A146Y712; H2S…	567.278	1133.55	-1.50213	-0.000851373	100	38.2067
High	LFLQNFSAGAR	H2M0U7; A5I874	C0LEK8; Q7ZT36; P86742; E0WD92; D3YPP5; I3J1U5; P86740; C3UVG3; D3YPP2; F8U037; P86749; C0LEK3; C0LEL7; E1UIZ8; P86764; C0LEL1; W5KKR2; P09227; C6GKU3; A0A0F8C4S0; C0LEL6; C0LEL8; H2M0U7; C0LEK5; P86768; C0LEL4; G8GWA2; A0A087Y5E9; D2KQG3; C0LEK6; P86778; G8GWA4; A0A0S7MHI2; D3YPN9; P86745; C0LEL3; Q8UUS3; Q1XAN4; D5LIS2; B9VJM3; Q9I8V0; P86765; E3TGD0; H2M0U0; Q0R3Z9; P86752; P86774; Q0PWR5; A5I…	612.33	1223.65	-1.00449	-0.000614576	58.9674	58.8428
High	VGDSQVAFNQVADIMR	B9V2Y1	B6VCB3; C7EP37; H2TBH9; A0A0F8AVT1; Q9PUT0; B7U3X5; B9V2Y1; Q9IB32; F2WR27; H2LAV5; Q90W40	875.435	1749.86	2.00493	0.00175417	54.5858	67.2137
High	SVVLDQANNFQAMTQLVIPEGDHFVDDPKQK	A0A060W1F1; A0A060ZDQ0	A0A060W1F1; A0A060ZDQ0	871.685	3483.72	-0.82929	-0.000722254	26.7639	79.3683
High	AISEELDHALNDMTSI	D6PVP3; Q8AV86; Q8JIM7; A0A087YEU9; A0A087YF71; P13104; E3TFQ0; H2MA79	H3CSI6; A0A0S7K1B6; K4PEK4; D6PVP3; E3TC29; G1FCF2; Q6P0W3; Q8AV86; Q8JIM7; H2M5M4; X2J4M2; Q805D2; I3J2Q1; A0A146W5R6; F6NVA3; W5KS79; Q8JIM8; A0A146NCI0; A0A0S7FXE9; Q91490; I3JVV2; W5JYT8; A0A087YEU9; A0A087YF71; A0A146WFT2; A0A146YH85; P13104; W5UMT9; A0A087XA45; Q76CT4; Q7ZVK9; Q9DEB7; B9V2W9; E3TFQ0; H2MA79; H2TF14; F2WR17; W5JZC9; H3C493	879.914	1758.82	-0.136864	-0.00012036	18.0155	72.4818
High	INFDAFLPMLK		A0A0F8AVT1; Q9IB29	654.855	1308.7	0.759744	0.000497139	36.8222	82.1874
High	IEELEEELEAER	A0A060VYS1; A0A146UU13	A0A0S7G0W1; A0A0N8JYG6; A0A146TVH6; A0A146YAN3; A0A146UU32; A0A146UV76; A0A0S7I064; A0A0S7FZ99; A0A060YPQ8; G3PQ58; M3ZVQ6; A0A146UU29; A0A146UU23; E9QF07; A0A146UU19; A0A0R4IVW7; A0A146UUA7; A0A060WTP0; A0A0P7YUT3; A0A0F8C5Q7; A0A0F8AU90; A0A146UVS4; W5KRZ6; W5L0R5; A0A146PH08; Q508P8; H2MDC8; E6ZIC7; Q4T6T1; A0A146UUJ4; H3C1R4; A0A0R4INI3; A0A0G2L354; A0A146UV67; W5U761; A8WBZ8; A0A0S7I061; A0A…	744.856	1488.7	-1.5179	-0.00112985	100	54.4724
High	IEELEEEIEAER	B1Q382; G9M5T1; A0A087XQZ5; T2HFG0; B3DJM6; W5L2L4; H2UN88; Q8JIP5; C0STL2; P87344; Q05K06; B1Q385; A0A060Y971; Q98TQ5; H3DR28	A0A146QK60; A8R0Q2; Q05K05; H2LNV3; G3N9L7; B1Q382; Q789E7; G3N9L2; F1R6C7; H3CNF0; H3CMX1; Q90YF6; C4TIP2; A0A147A0M4; Q05K11; A0A087YKG8; C4TIP3; A0A0S7LIY8; A0A146Q5H9; Q2PMW9; A0A060XH29; M3ZPQ1; A8R0Q7; Q4RXH7; A0A146RH13; B1PF34; H3DB42; A0A146RQV8; A0A060YBV0; A0A146W7Q2; H3BX59; A0A0F8BDK2; A0A146W4J3; G9M5T1; A0A0F8CX77; A0A060Y5W1; A0A087XQZ5; A0A146Y740; Q90337; A0A146Y8S1; C4TIP1; A0A…	744.856	1488.7	-1.5179	-0.00112985	100	54.4724
High	LNFDAFLPMLK	B9V2Y1	B6VCB3; H2TBH9; A0A146SAL6; Q4SMB6; I3K6V3; A0A0S7MDP0; B7U3X5; B9V2Y1; F2WR27; A0A147A177; H2LAV5; H3CSC1; A0A146P771; A0A087Y5E6; A0A147A2F8; P82160; A0A096MH75; Q90W40	654.855	1308.7	0.759744	0.000497139	36.8222	82.1874
High	GIQIVTSPYTILFK	A0A060W1F1; A0A060XSW8; A0A060VZH2	A0A060W1F1; A0A060XSW8; A0A060VZH2	790.46	1579.91	1.97282	0.00155844	68.2492	77.8955
High	SLDDSELESPTDEVFYPGR	G3Q767	G3Q767; G3Q768	719.326	2155.96	-1.56265	-0.00112301	48.0975	56.5454
High	VHLDAITSDDAGNIYAFR	A0A087YCT1	I1SRH7; P79825; A0A087YCT1; Q8JIP9; A0A0S7IE29; Q6PHG2	659.993	1977.96	-1.61227	-0.001063	85.8564	66.4419
High	MEIQEIQLK	A0A146W5Y8; A0A0S7K258; E3TFQ0	A0A0S7K1B6; A0A146MW79; A0A146ZYU7; A0A146W5S1; E2FWP5; A0A146W5R6; F6NVA3; A7WTZ1; F6P435; E7FBZ3; Q6NYQ0; A0A146W5Y8; A0A146W2Z9; A0A0S7K258; A7E2K1; G8JCI4; Q7SXW1; E2IJC8; A0A146MYM3; A0A087XA45; Q7ZVK9; A0A146P5S8; G8JCL1; A0A146W620; Q66LG2; A0A146MVQ5; E3TFQ0; W5JZC9	566.307	1131.61	-0.203229	-0.000114988	80.1119	56.7997
High	LKGTEDELDKYSEALK	D6PVP3; H2LUJ8; Q8AV86; A0A0F8AT58; A0A146W5Y8; A0A0S7K258; A0A147A2G3; A0A087YF71; E3TFQ0; A0A0F8CF82	A0A0S7K1B6; K4PEK4; D6PVP3; H2LUJ8; G1FCF2; Q6P0W3; A0A060WR17; Q8AV86; G3P8Z9; F8U085; G3N8Q3; X2J4M2; A0A146ZYU7; A0A146W5S1; A0A146W5R6; F6NVA3; A5WW36; A0A0F8AT58; I3KDN0; A0A147AVZ3; E7FBZ3; G3P8Z5; B9EMY1; A0A146NCI0; Q91490; A0A146W5Y8; A0A146W2Z9; A0A0S7K258; M4AQP3; A0A147A2G3; A0A087YF71; A0A0S7MHR3; I3ISQ1; A0A087XA45; Q805C6; A0A0P7WKP3; Q76CT4; Q7ZVK9; A0A0P7YL18; Q9DEB7; A0A146W620;…	460.489	1838.94	-1.56402	-0.000719032	100	52.9369
High	QLEDDLVALQK	D6PVP3; Q8AV86; Q8JIM7; Q5SPK6; A0A146W5Y8; A0A0S7K258; A0A147A2G3; H2SQV9; A0A087YEU9; P13104; E3TFQ0; H2MA79	H3CSI6; A0A0S7K1B6; K4PEK4; D6PVP3; H2SQW0; A0A096M4B0; G1FCF2; H3C382; Q8AV86; F8U085; Q8JIM7; X2J4M2; A0A146ZYU7; A0A146W5S1; I3J2Q1; A0A146W5R6; Q805D0; H2SQV7; G3P8Z5; Q8JIM8; Q5SPK6; H2MA80; Q4SAI3; A0A146W5Y8; A0A146W2Z9; A0A0S7K258; W5JYT8; A0A147A2G3; H2SQV9; A0A087YEU9; P13104; B5X4E8; Q91472; A0A087XA45; M4AS27; H3BYP9; Q9DEB7; A0A146W620; E3TFQ0; H2MA79; Q4SM36; W5JZC9; A0A146WDB4	636.346	1271.68	-0.0218844	-1.3915e-05	100	56.2942
High	MELQEIQLK	D6PVP3; Q8AV86; Q8JIM7; Q5SPK6; A0A147A2G3; H2SQV9; A0A087YF71; P13104; H2MA79; A0A0F8CF82	H3CSI6; A0A060X0I2; K4PEK4; D6PVP3; H2SQW0; Q805C9; Q803M1; A0A060WLJ6; G1FCF2; A0A0P7WSD3; Q6P0W3; Q8AV86; G3P8Z9; Q5SPK5; F8U085; G3N8Q3; Q8JIM7; H2M5M4; G3PVL2; X2J4M2; Q805D2; I3J2Q1; A5HDK1; Q805D0; W5KS79; I3KDN0; A0A147AVZ3; F5A824; Q5YDG9; H2SQV7; G3P8Z5; H9A6B0; Q8JIM8; A0A146NCI0; Q5SPK6; H2MA80; A0A060WRJ2; H9A690; Q4SAI3; A0A0S7FXE9; I3JVV2; M4AQP3; W5JYT8; H3CEU1; A0A147A2G3; H2SQV9;…	566.307	1131.61	-0.203229	-0.000114988	80.1119	56.7997
High	MEIQELQLK		Q805C3; A0A0S7FL43; A0A087X6Z2; A0A146WA78; A0A146WCY3; Q91489; A0A146WD86; H3BWT4; A0A096M9U2; Q4RWQ5; H2TMU3; Q805C2; A0A096MBU4; M3ZEK9; A0A0S7FMG7	566.307	1131.61	-0.203229	-0.000114988	80.1119	56.7997
High	LKGTEDELDKYSEALK	D6PVP3; H2LUJ8; Q8AV86; A0A0F8AT58; A0A146W5Y8; A0A0S7K258; A0A147A2G3; A0A087YF71; E3TFQ0; A0A0F8CF82	A0A0S7K1B6; K4PEK4; D6PVP3; H2LUJ8; G1FCF2; Q6P0W3; A0A060WR17; Q8AV86; G3P8Z9; F8U085; G3N8Q3; X2J4M2; A0A146ZYU7; A0A146W5S1; A0A146W5R6; F6NVA3; A5WW36; A0A0F8AT58; I3KDN0; A0A147AVZ3; E7FBZ3; G3P8Z5; B9EMY1; A0A146NCI0; Q91490; A0A146W5Y8; A0A146W2Z9; A0A0S7K258; M4AQP3; A0A147A2G3; A0A087YF71; A0A0S7MHR3; I3ISQ1; A0A087XA45; Q805C6; A0A0P7WKP3; Q76CT4; Q7ZVK9; A0A0P7YL18; Q9DEB7; A0A146W620;…	460.489	1838.94	-1.36487	-0.00062748	100	52.8879
High	LDKENAIDR	A0A0F8AT58; A0A147AWH1; A0A087XSB4	G3PBG3; A0A0S7FPU0; A0A146YIJ7; A0A0R4INL7; A0A0R4IM99; A0A146P4T3; Q805C3; B9ELP6; H2RS11; Q805C7; Q4T142; H3DDF1; H2TYG2; B5X1U5; H2RS10; I3J232; Q805C5; A0A087X6Z2; H2TYG5; A0A096LSJ0; Q6IQD7; A0A0F8BET2; A0A146WA78; Q805C8; H2MRC9; H2RS09; A0A0F8AT58; Q91489; W5L7Y3; H2TYG4; B9EMY1; A0A146WD86; Q4RWQ5; B9EPX8; G3PBG1; A0A146QSH5; A0A147AWH1; M3ZMF1; I3K0E5; H2RS08; A0A087XSB4; Q5U3J6; F1R412;…	537.282	1073.56	-1.06419	-0.000571237	91.0465	26.3625
High	LDKENALDR	D6PVP3; H2LUJ8; Q5SPK6; A0A146W5Y8; A0A0S7K258; A0A147A2G3; A0A087YEU9; A0A087YF71; P13104; E3TFQ0; H2MA79; A0A0F8CF82	H3CSI6; A0A0S7K1B6; K4PEK4; D6PVP3; E3TC29; H2LUJ8; A0A096M4B0; G1FCF2; H3C901; H3C382; G3P8Z9; F8U085; A0A146ZYU7; A0A146W5S1; Q805D2; I3J2Q1; A0A0P7TWT7; A0A146W5R6; F6NVA3; I3KDN0; A0A147AVZ3; F6P435; E7FBZ3; G3P8Z5; Q8JIM8; Q5SPK6; H2MA80; A0A0P7UPE5; A0A060X1U2; A0A0E9XQC4; Q6NYQ0; A0A146W5Y8; A0A146W2Z9; A0A0S7K258; M4AQP3; W5JYT8; A0A147A2G3; A0A087YEU9; A0A087YF71; A0A0S7MHR3; A0A060W8G0;…	537.282	1073.56	-1.06419	-0.000571237	91.0465	26.3625
High	LFLQNFSAGAR	H2M0U7; A5I874	C0LEK8; Q7ZT36; P86742; E0WD92; D3YPP5; I3J1U5; P86740; C3UVG3; D3YPP2; F8U037; P86749; C0LEK3; C0LEL7; E1UIZ8; P86764; C0LEL1; W5KKR2; P09227; C6GKU3; A0A0F8C4S0; C0LEL6; C0LEL8; H2M0U7; C0LEK5; P86768; C0LEL4; G8GWA2; A0A087Y5E9; D2KQG3; C0LEK6; P86778; G8GWA4; A0A0S7MHI2; D3YPN9; P86745; C0LEL3; Q8UUS3; Q1XAN4; D5LIS2; B9VJM3; Q9I8V0; P86765; E3TGD0; H2M0U0; Q0R3Z9; P86752; P86774; Q0PWR5; A5I…	612.329	1223.65	-1.50329	-0.000919752	100	58.7914
High	AITDAAMMSEELK	W5L2L4; A0A0F8C3K6; Q05K06	Q05K07; W5L2L4; A0A0F8C3K6; Q05K06; Q05K12	705.336	1409.67	0.00597394	4.21063e-06	100	57.8529
High	QLEDDLVALQK	D6PVP3; Q8AV86; Q8JIM7; Q5SPK6; A0A146W5Y8; A0A0S7K258; A0A147A2G3; H2SQV9; A0A087YEU9; P13104; E3TFQ0; H2MA79	H3CSI6; A0A0S7K1B6; K4PEK4; D6PVP3; H2SQW0; A0A096M4B0; G1FCF2; H3C382; Q8AV86; F8U085; Q8JIM7; X2J4M2; A0A146ZYU7; A0A146W5S1; I3J2Q1; A0A146W5R6; Q805D0; H2SQV7; G3P8Z5; Q8JIM8; Q5SPK6; H2MA80; Q4SAI3; A0A146W5Y8; A0A146W2Z9; A0A0S7K258; W5JYT8; A0A147A2G3; H2SQV9; A0A087YEU9; P13104; B5X4E8; Q91472; A0A087XA45; M4AS27; H3BYP9; Q9DEB7; A0A146W620; E3TFQ0; H2MA79; Q4SM36; W5JZC9; A0A146WDB4	636.346	1271.68	-0.309858	-0.00019702	100	53.0699
High	VGDSQVAFNQVADIMR	B9V2Y1	B6VCB3; C7EP37; H2TBH9; A0A0F8AVT1; Q9PUT0; B7U3X5; B9V2Y1; Q9IB32; F2WR27; H2LAV5; Q90W40	875.433	1749.86	-0.0878717	-7.68816e-05	27.7227	67.3091
High	NLTEEMASQDESVAK	B1Q382; P87344; B1Q385	B1Q382; O93498; B1Q383; P87344; B1Q385; B1Q384; A0A060XZG1	826.376	1651.74	-2.2072	-0.00182287	100	46.8556
High	AISEELDHALNDMTSL	A0A087XSB4	G3PBG3; H2RS11; A0A146VDU0; H2RS10; I3J232; Q805C5; Q1LXM1; H2MRC9; H2RS09; Q91489; H2RS08; A0A087XSB4; A0A060WIN1; A0A0F8D2I6; A0A146VDT9; F1QKG7	879.915	1758.82	0.487778	0.000428957	21.5883	68.9904
High	AADAESDVASLNR	Q8AV86	Q8AV86	659.816	1318.62	0.455715	0.000300458	100	46.9013
High	AISEELDHALNDMTSI	D6PVP3; Q8AV86; Q8JIM7; A0A087YEU9; A0A087YF71; P13104; E3TFQ0; H2MA79	H3CSI6; A0A0S7K1B6; K4PEK4; D6PVP3; E3TC29; G1FCF2; Q6P0W3; Q8AV86; Q8JIM7; H2M5M4; X2J4M2; Q805D2; I3J2Q1; A0A146W5R6; F6NVA3; W5KS79; Q8JIM8; A0A146NCI0; A0A0S7FXE9; Q91490; I3JVV2; W5JYT8; A0A087YEU9; A0A087YF71; A0A146WFT2; A0A146YH85; P13104; W5UMT9; A0A087XA45; Q76CT4; Q7ZVK9; Q9DEB7; B9V2W9; E3TFQ0; H2MA79; H2TF14; F2WR17; W5JZC9; H3C493	879.915	1758.82	0.487778	0.000428957	21.5883	68.9904
High	LFLQNFASGAR	A0A0P7XIM1	A0A0P7XIM1	612.329	1223.65	-1.50329	-0.000919752	100	58.7914
High	VSPLLPCDQGSEGHSSASETESTGSR	A0A0P7Z802	A0A0P7Z802	873.393	2618.16	0.0267195	2.33186e-05	100	45.8983
High	LFLQVFSAGAR	P56503	P86758; P86744; P86775; P86771; P86753; P86762; P56503; P86757; P86769	604.842	1208.68	-1.19725	-0.000723544	100	65.8516
High	LFLQNFSASAR	H3D5S1	D3YPP4; D3YPP6; A0A087Y0Y7; E0WD99; H3D320; H2TLP9; A9ZTF2; Q5IRB2; C0LEK0; P86432; Q91483; I3KV10; I3KV11; Q4S885; G3PES6; W5KKQ1; Q4S4I4; M4AK77; W5ZMY4; Q6B4H7; D3YPP3; A0A060X840; H3D5S1; A0A0P7Y0D7; B5WX08; A0A096M2G1; A0A060WYV9; Q90YK7; C0LEK7; H2V1I8; G3P4E3; C0LEL5	627.335	1253.66	-0.254616	-0.000159602	100	59.105
High	EELNEIIEEVDEDGSGTIDFEEFLVMMVR	W5UMX1	W5UMX1	1129.85	3387.53	-4.80247	-0.00542287	100	129.702
High	AITDAAMMSEELK	W5L2L4; A0A0F8C3K6; Q05K06	Q05K07; W5L2L4; A0A0F8C3K6; Q05K06; Q05K12	705.335	1409.66	-1.29295	-0.000911317	100	57.9034
High	AGEDLKEQAAMVER	B1Q382	B1Q382; B1Q383	516.257	1546.76	1.44832	0.00074673	100	41.9504
High	QLEDDLVALQK	D6PVP3; Q8AV86; Q8JIM7; Q5SPK6; A0A146W5Y8; A0A0S7K258; A0A147A2G3; H2SQV9; A0A087YEU9; P13104; E3TFQ0; H2MA79	H3CSI6; A0A0S7K1B6; K4PEK4; D6PVP3; H2SQW0; A0A096M4B0; G1FCF2; H3C382; Q8AV86; F8U085; Q8JIM7; X2J4M2; A0A146ZYU7; A0A146W5S1; I3J2Q1; A0A146W5R6; Q805D0; H2SQV7; G3P8Z5; Q8JIM8; Q5SPK6; H2MA80; Q4SAI3; A0A146W5Y8; A0A146W2Z9; A0A0S7K258; W5JYT8; A0A147A2G3; H2SQV9; A0A087YEU9; P13104; B5X4E8; Q91472; A0A087XA45; M4AS27; H3BYP9; Q9DEB7; A0A146W620; E3TFQ0; H2MA79; Q4SM36; W5JZC9; A0A146WDB4	636.346	1271.68	-0.213866	-0.000135985	76.534	53.0207
High	HIAEEADRK	D6PVP3; Q8AV86; Q8JIM7; A0A0F8AT58; Q5SPK6; A0A146W5Y8; A0A147AWH1; A0A0S7K258; A0A087XSB4; A0A147A2G3; H2SQV9; A0A087YEU9; A0A087YF71; P13104; E3TFQ0; H2MA79; A0A0F8CF82	H3CSI6; G3PBG3; A0A0S7FPU0; Q805C4; A0A146YIJ7; A0A0S7K1B6; A0A0R4INL7; A0A0R4IM99; A0A146P4T3; A0A0P7V399; A0A060X0I2; Q4TI88; B9ELP6; K4PEK4; A0A060WJN0; H2RS11; D6PVP3; H2SQW0; Q1LXM2; W5UML0; A0A0S7FL43; A0A0E9X8H8; A0A146MW79; I3KQJ0; Q805C7; Q805C9; Q4T142; Q803M1; A0A060WLJ6; A0A096M4B0; A0A146VDU0; G1FCF2; H3DDF1; A0A0P7WSD3; H2TYG2; B5X1U5; Q6P0W3; A0A060VSE4; H2RS10; H2MUU8; H3C7I0; Q8A…	356.853	1068.54	0.170998	6.09061e-05	100	25.5878
High	VAEQELVDASER	G9M5T1; A0A087XQZ5; T2HFG0; B3DJM6; W5L2L4; H2UN88; C0STL2; A0A0F8C3K6; P87344; Q05K06; D6PVQ0; A0A0F8CGF3; H3DR28; Q33BP2	H3CMS0; A0A146QK60; M3ZV86; A8R0Q2; Q05K05; H2LNV3; Q789E7; G3N9L2; F1R6C7; C0STL4; H3CMX1; Q90YF6; A0A147A0M4; Q05K11; A0A087YKG8; A0A146Q5H9; A0A0F8C274; M3ZPQ1; Q4RXH7; H3DB42; A0A146RQV8; H3CNI4; H3BX59; A0A146W4J3; A0A0S7JAN2; G9M5T1; A0A087XQZ5; A0A0S7K7R5; A0A146Y740; Q90337; Q91520; C4TIP1; Q98TQ4; A0A146U920; Q508P7; A0A146SGF7; A4GWV4; H2ULB1; T2HFG0; I3IZY8; Q90339; Q4RXH2; Q9IBD7; Q05…	673.333	1345.66	-0.309183	-0.000208027	100	31.3507
High	SSPPASQQAAAATCPR	A0A060XRV1	A0A060XRV1	771.868	1542.73	-2.97922	-0.00229807	100	31.2945
High	AITDAAMMSEELK	W5L2L4; A0A0F8C3K6; Q05K06	Q05K07; W5L2L4; A0A0F8C3K6; Q05K06; Q05K12	705.335	1409.66	-1.46615	-0.00103339	100	57.7909
